# Supplementary material
Source: publisher site journal article supplement (https://www.dovepress.com/article/346097)
Supplement: Supplementary file 1 [file get_supplementary_file.php]

| Supplementary Table ST1: Deregulated microRNAs in diabetic retinopathy |                                                                            |           |                                                            |                                             |                                                                                                                                                                       |            |
|------------------------------------------------------------------------|----------------------------------------------------------------------------|-----------|------------------------------------------------------------|---------------------------------------------|-----------------------------------------------------------------------------------------------------------------------------------------------------------------------|------------|
| MicroRNA                                                               | Detected in                                                                | Altered   | In                                                         | Compared with                               | Comment                                                                                                                                                               | References |
| let-7a-5p                                                              | serum                                                                      | Increased | DR                                                         | T2DM patients with noDR                     |                                                                                                                                                                       | [1]        |
| let-7b                                                                 | Aqueous and vitreous humor or plasma                                       | Increased | DR/NPDR/PDR (mixed)                                        | Normal (without diabetic retinopathy)       | Result in GSE140959 (Aqueous and vitreous humor, plasma from DR/NPDR/PDR and compared with macular pucker or macular hole patients as normal, Ref. N6) was reanalysed | [2, 3]     |
| let-7b-5p                                                              | Retina during vasodegenerative phases of oxygen-induced retinopathy (OIR)  | Decreased | Model for PDR                                              | Control animal                              |                                                                                                                                                                       | [4]        |
| let-7b-5p                                                              | Choroid during vasodegenerative phases of oxygen-induced retinopathy (OIR) | Decreased | Model for PDR                                              | Control animal                              |                                                                                                                                                                       | [4]        |
| let-7c                                                                 | Vitreous humor                                                             | Decreased | PDR                                                        | MH patients                                 |                                                                                                                                                                       | [1]        |
| let-7c-5p                                                              | Aqueous humor                                                              | Decreased | diabetic macular edema (DME)                               | non-diabetic patients (CTR)                 |                                                                                                                                                                       | [5]        |
| let-7f-5p                                                              | Choroid during vasodegenerative phases of oxygen-induced retinopathy (OIR) | Decreased | Model for PDR                                              | Control animal                              |                                                                                                                                                                       | [4]        |
| let-7g                                                                 | Aqueous and vitreous humor or plasma                                       | Decreased | DR/NPDR/PDR (mixed)                                        | Normal (without diabetic retinopathy)       | Result in GSE140959 (Aqueous and vitreous humor, plasma from DR/NPDR/PDR and compared with macular pucker or macular hole patients as normal, Ref. N6) was reanalysed | [2, 3]     |
| let7g-5p                                                               | Choroid during vasodegenerative phases of oxygen-induced retinopathy (OIR) | Increased | Model for PDR                                              | Control animal                              |                                                                                                                                                                       | [4]        |
| let-7i                                                                 | Aqueous and vitreous humor or plasma                                       | Decreased | DR/NPDR/PDR (mixed)                                        | Normal (without diabetic retinopathy)       | Result in GSE140959 (Aqueous and vitreous humor, plasma from DR/NPDR/PDR and compared with macular pucker or macular hole patients as normal, Ref. N6) was reanalysed | [2, 3]     |
| miR-100-5p                                                             | Aqueous humor                                                              | Decreased | diabetic macular edema (DME)                               | non-diabetic patients (CTR)                 |                                                                                                                                                                       | [5]        |
| miR-101a-3p                                                            | Choroid during vasodegenerative phases of oxygen-induced retinopathy (OIR) | Increased | Model for PDR                                              | Control animal                              |                                                                                                                                                                       | [4]        |
| miR-102                                                                | Choroid during vasodegenerative phases of oxygen-induced retinopathy (OIR) | Increased | Model for PDR                                              | Control animal                              |                                                                                                                                                                       | [4]        |
| miR-106a                                                               | Aqueous and vitreous humor or plasma                                       | Decreased | DR/NPDR/PDR (mixed)                                        | Normal (without diabetic retinopathy)       | Result in GSE140959 (Aqueous and vitreous humor, plasma from DR/NPDR/PDR and compared with macular pucker or macular hole patients as normal, Ref. N6) was reanalysed | [2, 3]     |
| miR-106a                                                               | Retina and serum of animal                                                 | Decreased | diabetic C57BL/6J mice                                     | Control mice                                |                                                                                                                                                                       | [6]        |
| miR-106a-5p                                                            | Cells treated with high glucose                                            | Decreased | Cell model for diabetic retinopathy                        | Control cells (-treatemt with high glucose) | Involves in angiogenesis                                                                                                                                              | [7]        |
| miR-106b                                                               | Aqueous and vitreous humor or plasma                                       | Decreased | DR/NPDR/PDR (mixed)                                        | Normal (without diabetic retinopathy)       | Result in GSE140959 (Aqueous and vitreous humor, plasma from DR/NPDR/PDR and compared with macular pucker or macular hole patients as normal, Ref. N6) was reanalysed | [2, 3]     |
| miR-1179                                                               | serum                                                                      | Increased | PDR                                                        | NPDR                                        |                                                                                                                                                                       | [1]        |
| miR-122                                                                | serum                                                                      | Increased | NDR and from NDR to NPDR                                   | Healthy control                             |                                                                                                                                                                       | [8]        |
| miR-122                                                                | retinal pigment epithelial cells treated with high glucose                 | Increased | retinal pigment epithelial cells treated with high glucose | Control cells (-treatemt with high glucose) | miR-122 targets metalloproteinases-3 (TIMP3) and modulates cell viability and apoptosis                                                                               | [9]        |
| miR-124-3p                                                             | Retina during vasodegenerative phases of oxygen-induced retinopathy (OIR)  | Decreased | Model for PDR                                              | Control animal                              |                                                                                                                                                                       | [4]        |
| miR-125a-5p                                                            | Choroid during vasodegenerative phases of oxygen-induced retinopathy (OIR) | Increased | Model for PDR                                              | Control animal                              |                                                                                                                                                                       | [4]        |
| miR-126                                                                | Aqueous and vitreous humor or plasma                                       | Decreased | DR/NPDR/PDR (mixed)                                        | Normal (without diabetic retinopathy)       | Result in GSE140959 (Aqueous and vitreous humor, plasma from DR/NPDR/PDR and compared with macular pucker or macular hole patients as normal, Ref. N6) was reanalysed | [2, 3]     |
| miR-126                                                                | serum                                                                      | Decreased | DR/NPDR                                                    | DM patients with no DR.                     | The level of expression of miR-126 in the PDR group was significantly lower than that in the combined NDR and NPDR group.                                             | [1]        |

|             |                                                                                                                      |           |                                                                       |                                           |                                                                                                                                                                           |        |
|-------------|----------------------------------------------------------------------------------------------------------------------|-----------|-----------------------------------------------------------------------|-------------------------------------------|---------------------------------------------------------------------------------------------------------------------------------------------------------------------------|--------|
| miR-126     | Rat model and Retina of diabetic rat, serum                                                                          | Decreased | Retina of diabetic rat, serum                                         | Nondiabetic rat                           | miR-126 targets PLK4 and the intravitreal delivery of miR-126 alleviated retinopathy, suppresses endothelial cell proliferation and migration                             | [10]   |
| miR-126a-5p | Choroid during vasodegenerative phases of oxygen-induced retinopathy (OIR)                                           | Decreased | Model for PDR                                                         | Control animal                            | Involves in angiogenesis, apoptosis, inflammation                                                                                                                         | [4]    |
| miR-130a    | Aqueous and vitreous humor or plasma                                                                                 | Decreased | DR/NPDR/PDR (mixed)                                                   | Normal (without diabetic retinopathy)     | Result in GSE140959 (Aqueous and vitreous humor, plasma from DR/NPDR/PDR and compared with macular pucker or macular hole patients as normal, Ref. N6) was reanalysed     | [2, 3] |
| miR-135a-5p | Retina during vasodegenerative phases of oxygen-induced retinopathy (OIR)                                            | Decreased | Model for PDR                                                         | Control animal                            |                                                                                                                                                                           | [4]    |
| miR-142-3p  | Retina during vasodegenerative phases of oxygen-induced retinopathy (OIR)                                            | Increased | Model for PDR                                                         | Control animal                            |                                                                                                                                                                           | [4]    |
| miR-143-3p  | Choroid during vasodegenerative phases of oxygen-induced retinopathy (OIR)                                           | Increased | Model for PDR                                                         | Control animal                            | Involves in angiogenesis, apoptosis, inflammation                                                                                                                         | [4]    |
| miR-148-3p  | Human retinal microvascular endothelial cells (HRECs) treated with different concentration gradients of high glucose | Decreased | Retinal cells treated with high glucose                               | Cells without treatment with high glucose | miR-148a-3p targets TGFB2 and FGF2. Over expression of miR-148a-3p caused increased cell viability and decreased apoptosis, modulated angiogenesis mediated through TGFB2 | [11]   |
| miR-148a-3p | serum                                                                                                                | Decreased | DR                                                                    | T2DM-noDR                                 |                                                                                                                                                                           | [1]    |
| miR-150     | Aqueous and vitreous humor or plasma                                                                                 | Decreased | DR/NPDR/PDR (mixed)                                                   | Normal (without diabetic retinopathy)     | Result in GSE140959 (Aqueous and vitreous humor, plasma from DR/NPDR/PDR and compared with macular pucker or macular hole patients as normal, Ref. N6) was reanalysed     | [2, 3] |
| miR-151a-5p | serum                                                                                                                | Decreased | DR                                                                    | T2DM-noDR                                 |                                                                                                                                                                           | [1]    |
| miR-152-3p  | Retina during vasodegenerative phases of oxygen-induced retinopathy (OIR)                                            | Decreased | Model for PDR                                                         | Control animal                            |                                                                                                                                                                           | [4]    |
| miR-155     | PBMC                                                                                                                 | Increased | PDR and Background Retinopathy (BDR, early stage DR)                  | Nondiabetic retinopathy, healthy control  | Expression of miR-155 was negatively related to Treg cells ( $r = -0.835$ $p = 0.000$ ) and TGF- $\beta$ ( $r = -0.771$ , $p = 0.000$ ).                                  | [12]   |
| miR-155     | Plasma                                                                                                               | Increased | BDR and PDR                                                           | T2DM patients without DR                  |                                                                                                                                                                           | [1]    |
| miR-15a     | Aqueous and vitreous humor or plasma                                                                                 | Decreased | DR/NPDR/PDR (mixed)                                                   | Normal (without diabetic retinopathy)     | Result in GSE140959 (Aqueous and vitreous humor, plasma from DR/NPDR/PDR and compared with macular pucker or macular hole patients as normal, Ref. N6) was reanalysed     | [2, 3] |
| miR-15a     | Vitreous humor                                                                                                       | Increased | PDR                                                                   | MH eyes                                   |                                                                                                                                                                           | [1]    |
| miR-15b     | Aqueous and vitreous humor or plasma                                                                                 | Decreased | DR/NPDR/PDR (mixed)                                                   | Normal (without diabetic retinopathy)     | Result in GSE140959 (Aqueous and vitreous humor, plasma from DR/NPDR/PDR and compared with macular pucker or macular hole patients as normal, Ref. N6) was reanalysed     | [2, 3] |
| miR-15b     | Serum/plasma                                                                                                         | Decreased | PDR                                                                   | DM or NPDR                                | miR-15b targets VEGF and regulates vascular abnormalities in vivo in diabetic rats inhibiting endothelial tube formation                                                  | [13]   |
| miR-16-1    | Aqueous and vitreous humor or plasma                                                                                 | Decreased | DR/NPDR/PDR (mixed)                                                   | Normal (without diabetic retinopathy)     | Result in GSE140959 (Aqueous and vitreous humor, plasma from DR/NPDR/PDR and compared with macular pucker or macular hole patients as normal, Ref. N6) was reanalysed     | [2, 3] |
| miR-16-2    | Aqueous and vitreous humor or plasma                                                                                 | Decreased | DR/NPDR/PDR (mixed)                                                   | Normal (without diabetic retinopathy)     | Result in GSE140959 (Aqueous and vitreous humor, plasma from DR/NPDR/PDR and compared with macular pucker or macular hole patients as normal, Ref. N6) was reanalysed     | [2, 3] |
| miR-17      | Aqueous and vitreous humor or plasma                                                                                 | Decreased | DR/NPDR/PDR (mixed)                                                   | Normal (without diabetic retinopathy)     | Result in GSE140959 (Aqueous and vitreous humor, plasma from DR/NPDR/PDR and compared with macular pucker or macular hole patients as normal, Ref. N6) was reanalysed     | [2, 3] |
| miR-181C    | serum                                                                                                                | Increased | PDR                                                                   | NPDR                                      |                                                                                                                                                                           | [1]    |
| miR-18a     | Aqueous and vitreous humor or plasma                                                                                 | Decreased | DR/NPDR/PDR (mixed)                                                   | Normal (without diabetic retinopathy)     | Result in GSE140959 (Aqueous and vitreous humor, plasma from DR/NPDR/PDR and compared with macular pucker or macular hole patients as normal, Ref. N6) was reanalysed     | [2, 3] |
| miR-18a-5p  | Mouse model of oxygen-induced proliferative retinopathy (OIR)                                                        | Increased | Increased in pathologic neovascularization in the retinas of OIR mice | Control mice                              | miR-18a-5p directly decreased FGF1 and HIF1A                                                                                                                              | [14]   |
| miR-18b     | serum                                                                                                                | Increased | DR                                                                    | Nondiabetic retinopathy                   | AUC values with 95% CI calculated by ROC curves was 0.779                                                                                                                 | [1]    |
| miR-192     | Aqueous and vitreous humor or plasma                                                                                 | Decreased | DR/NPDR/PDR (mixed)                                                   | Normal (without diabetic retinopathy)     | Result in GSE140959 (Aqueous and vitreous humor, plasma from DR/NPDR/PDR and compared with macular pucker or macular hole patients as normal, Ref. N6) was reanalysed     | [2, 3] |
| miR-193a-5p | Aqueous humor                                                                                                        | Decreased | diabetic macular edema (DME)                                          | non-diabetic patients (CTR)               |                                                                                                                                                                           | [5]    |

|             |                                                                           |           |                                     |                                                                                                                    |                                                                                                                                                                                                                                                                                                         |        |
|-------------|---------------------------------------------------------------------------|-----------|-------------------------------------|--------------------------------------------------------------------------------------------------------------------|---------------------------------------------------------------------------------------------------------------------------------------------------------------------------------------------------------------------------------------------------------------------------------------------------------|--------|
| miR-194-1   | Aqueous and vitreous humor or plasma                                      | Decreased | DR/NPDR/PDR (mixed)                 | Normal (without diabetic retinopathy)                                                                              | Result in GSE140959 (Aqueous and vitreous humor, plasma from DR/NPDR/PDR and compared with macular pucker or macular hole patients as normal, Ref. N6) was reanalysed                                                                                                                                   | [2, 3] |
| miR-194-2   | Aqueous and vitreous humor or plasma                                      | Decreased | DR/NPDR/PDR (mixed)                 | Normal (without diabetic retinopathy)                                                                              | Result in GSE140959 (Aqueous and vitreous humor, plasma from DR/NPDR/PDR and compared with macular pucker or macular hole patients as normal, Ref. N6) was reanalysed                                                                                                                                   | [2, 3] |
| miR-199a-5p | Retina during vasodegenerative phases of oxygen-induced retinopathy (OIR) | Decreased | Model for PDR                       | Control animal                                                                                                     | Involves in angiogenesis, apoptosis, inflammation                                                                                                                                                                                                                                                       | [4]    |
| miR-19b     | serum                                                                     | Increased | DR                                  | Nondiabetic retinopathy                                                                                            | AUC values with 95% CI calculated by ROC curves was 0.744                                                                                                                                                                                                                                               | [1]    |
| miR-19b-3p  | Aqueous humor                                                             | Decreased | diabetic macular edema (DME)        | non-diabetic patients (CTR)                                                                                        |                                                                                                                                                                                                                                                                                                         | [5]    |
| miR-1b-5p   | Retina during vasodegenerative phases of oxygen-induced retinopathy (OIR) | Decreased | Model for PDR                       | Control animal                                                                                                     | Involves in angiogenesis, apoptosis, inflammation                                                                                                                                                                                                                                                       | [4]    |
| miR-200-3p  | Retina tissues of DR rats and cultured cells treated with high glucose    | Decreased | Retina                              | Control mice                                                                                                       | miR-200a-3p targets TGF- $\beta$ 2. overexpression of miR-200a-3p promoted cell proliferation, reduced apoptosis, as well as inhibited the levels of inflammatory cytokines secreted, matrix metalloproteinase 2/9 (MMP2/9), and vascular endothelial growth factor (VEGF) in HG-injured ARPE-19 cells. | [15]   |
| miR-200b    | serum                                                                     | Decreased | DR                                  | Healthy control                                                                                                    | VEGFA was confirmed as a target of miR-200b                                                                                                                                                                                                                                                             | [16]   |
| miR-200b    | Retinal tissue                                                            | Decreased | DR                                  | Decreased level was first identified in mouse model and confirmed in human retinal tissue by in situ hybridization | VEGFA was confirmed as a target of miR-200b                                                                                                                                                                                                                                                             | [17]   |
| miR-200b-3p | Aqueous humor                                                             | Decreased | diabetic macular edema (DME)        | non-diabetic patients (CTR)                                                                                        |                                                                                                                                                                                                                                                                                                         | [5]    |
| miR-204     | Vitreous humor                                                            | Decreased | PDR                                 | MH patients                                                                                                        |                                                                                                                                                                                                                                                                                                         | [1]    |
| miR-204-5p  | Aqueous humor                                                             | Decreased | diabetic macular edema (DME)        | non-diabetic patients (CTR)                                                                                        |                                                                                                                                                                                                                                                                                                         | [5]    |
| miR-206-3p  | Retina and serum of animal                                                | Increased | diabetic C57BL/6J mice              | Control mice                                                                                                       |                                                                                                                                                                                                                                                                                                         | [6]    |
| miR-20a     | Aqueous and vitreous humor or plasma                                      | Decreased | DR/NPDR/PDR (mixed)                 | Normal (without diabetic retinopathy)                                                                              | Result in GSE140959 (Aqueous and vitreous humor, plasma from DR/NPDR/PDR and compared with macular pucker or macular hole patients as normal, Ref. N6) was reanalysed                                                                                                                                   | [2, 3] |
| miR-20a-3p  | Retina and serum of animal                                                | Decreased | diabetic C57BL/6J mice              | Control mice                                                                                                       |                                                                                                                                                                                                                                                                                                         | [6]    |
| miR-20a-3p  | Cells treated with high glucose                                           | Decreased | Cell model for diabetic retinopathy | Control cells (-treatment with high glucose)                                                                       | Involves in angiogenesis                                                                                                                                                                                                                                                                                | [7]    |
| miR-20a-5p  | Cells treated with high glucose                                           | Decreased | Cell model for diabetic retinopathy | Control cells (-treatment with high glucose)                                                                       | Involves in angiogenesis                                                                                                                                                                                                                                                                                | [7]    |
| miR-20a-5p  | Retina and serum of animal                                                | Decreased | diabetic C57BL/6J mice              | Control mice                                                                                                       |                                                                                                                                                                                                                                                                                                         | [6]    |
| miR-20b     | Aqueous and vitreous humor or plasma                                      | Decreased | DR/NPDR/PDR (mixed)                 | Normal (without diabetic retinopathy)                                                                              | Result in GSE140959 (Aqueous and vitreous humor, plasma from DR/NPDR/PDR and compared with macular pucker or macular hole patients as normal, Ref. N6) was reanalysed                                                                                                                                   | [2, 3] |
| miR-20b     | Retina and serum of animal                                                | Decreased | diabetic C57BL/6J mice              | Control mice                                                                                                       |                                                                                                                                                                                                                                                                                                         | [6]    |
| miR-20b     | Cells treated with high glucose                                           | Decreased | Cell model for diabetic retinopathy | Control cells (-treatment with high glucose)                                                                       | Involves in angiogenesis                                                                                                                                                                                                                                                                                | [7]    |
| miR-21      | serum                                                                     | Increased | PDR                                 | NPDR                                                                                                               |                                                                                                                                                                                                                                                                                                         | [1]    |
| miR-21      | Plasma                                                                    | Increased | BDR and PDR                         | T2DM patients without DR                                                                                           | expression in the PDR group was significantly greater than in the BDR group                                                                                                                                                                                                                             | [1]    |
| miR-21      | Vitreous humor                                                            | Increased | PDR                                 | macular hole (MH) patients                                                                                         |                                                                                                                                                                                                                                                                                                         | [1]    |
| miR-210     | Serum                                                                     | Increased | DR                                  | DM without DR and healthy controls                                                                                 | overexpression of miR-210 promoted HUVEC proliferation, while the knockdown of miR-210 resulted in the opposite effect under a high-glucose condition                                                                                                                                                   | [18]   |
| miR-211     | serum                                                                     | Increased | DR                                  | Nondiabetic retinopathy                                                                                            | AUC values with 95% CI calculated by ROC curves was 0.864                                                                                                                                                                                                                                               | [1]    |
| miR-2116-5p | serum                                                                     | Increased | DR                                  | T2DM                                                                                                               | NOTCH2 was the target gene of miR-2116-5p                                                                                                                                                                                                                                                               | [19]   |
| miR-216a    | Retinal tissues of DR rats and cells treated with high glucose            | Decreased | DR rats                             | Control rat                                                                                                        | miR-216a targets NOS2 and played a protective role in the retina of DR rats. Moreover, in cell experiments, overexpression of miR-216a promoted the viability of HRMECs under d-glucose treatment, and inhibited NOS2 expression and the JAK/STAT signaling pathway activation.                         | [20]   |
| miR-221     | Serum                                                                     | Increased | T2DM, NDR,                          | Healthy control                                                                                                    | Serum miR-221 was positively correlated with metabolic parameters like glycated hemoglobin                                                                                                                                                                                                              | [21]   |

|               |                                                                            |           |                                                            |                                             |                                                                                                                                                                                                                                                                                                                                                                                                            |        |
|---------------|----------------------------------------------------------------------------|-----------|------------------------------------------------------------|---------------------------------------------|------------------------------------------------------------------------------------------------------------------------------------------------------------------------------------------------------------------------------------------------------------------------------------------------------------------------------------------------------------------------------------------------------------|--------|
|               |                                                                            |           | NPDR, PDR                                                  |                                             | ( $r=0.310$ , $P=0.002$ ) and homeostasis model assessment for insulin resistance ( $r=0.413$ , $P<0.001$ ), as well as serum markers for instance Ang II ( $r=0.667$ , $P<0.001$ ) and VEGF ( $r=0.499$ , $P<0.001$ ). Furthermore, serum miR-221 (AUC, 0.894; 95%CI, 0.833-0.955; $P<0.001$ ), Ang II (AUC, 0.888; 95%CI, 0.828-0.949; $P<0.001$ ) and VEGF (AUC, 0.785; 95%CI, 0.695-0.875; $P<0.001$ ) |        |
| miR-222       | Aqueous and vitreous humor or plasma                                       | Decreased | DR/NPDR/PDR (mixed)                                        | Normal (without diabetic retinopathy)       | Result in GSE140959 (Aqueous and vitreous humor, plasma from DR/NPDR/PDR and compared with macular pucker or macular hole patients as normal, Ref. N6) was reanalysed                                                                                                                                                                                                                                      | [2, 3] |
| miR-25        | Aqueous and vitreous humor or plasma                                       | Decreased | DR/NPDR/PDR (mixed)                                        | Normal (without diabetic retinopathy)       | Result in GSE140959 (Aqueous and vitreous humor, plasma from DR/NPDR/PDR and compared with macular pucker or macular hole patients as normal, Ref. N6) was reanalysed                                                                                                                                                                                                                                      | [2, 3] |
| miR-27a       | Aqueous and vitreous humor or plasma                                       | Decreased | DR/NPDR/PDR (mixed)                                        | Normal (without diabetic retinopathy)       | Result in GSE140959 (Aqueous and vitreous humor, plasma from DR/NPDR/PDR and compared with macular pucker or macular hole patients as normal, Ref. N6) was reanalysed                                                                                                                                                                                                                                      | [2, 3] |
| miR- 27a- 3 p | Retina and serum of animal                                                 | Increased | diabetic C57BL/6J mice                                     | Control mice                                |                                                                                                                                                                                                                                                                                                                                                                                                            | [6]    |
| miR- 27a- 5 p | Retina and serum of animal                                                 | Increased | diabetic C57BL/6J mice                                     | Control mice                                |                                                                                                                                                                                                                                                                                                                                                                                                            | [6]    |
| miR-27b       | serum                                                                      | Decreased | DR (T1DM)                                                  | T1D-noDR                                    |                                                                                                                                                                                                                                                                                                                                                                                                            | [1]    |
| miR-27b       | serum                                                                      | Decreased | DR (T1DM)                                                  | Healthy control                             | Odds ratios for higher miR-27b ranged from 0.570-78 in different cohorts, the miRNA was implicated in angiogenesis                                                                                                                                                                                                                                                                                         | [22]   |
| miR-28-3p     | serum                                                                      | Increased | DR                                                         | T2DM patients with noDR                     |                                                                                                                                                                                                                                                                                                                                                                                                            | [1]    |
| miR-29a       | Aqueous and vitreous humor or plasma                                       | Decreased | DR/NPDR/PDR (mixed)                                        | Normal (without diabetic retinopathy)       | Result in GSE140959 (Aqueous and vitreous humor, plasma from DR/NPDR/PDR and compared with macular pucker or macular hole patients as normal, Ref. N6) was reanalysed                                                                                                                                                                                                                                      | [2, 3] |
| miR-29a       | Vitreous humor                                                             | Increased | PDR                                                        | MH eyes                                     |                                                                                                                                                                                                                                                                                                                                                                                                            | [1]    |
| miR-29c-3p    | Plasma                                                                     | Decreased | diabetic patients with retinopathy and without retinopathy | Healthy control                             | Changes in plasma miR-29c-3p levels are an independent risk factor for the development of DR.                                                                                                                                                                                                                                                                                                              | [23]   |
| miR-30a-5p    | Choroid during vasodegenerative phases of oxygen-induced retinopathy (OIR) | Decreased | Model for PDR                                              | Control animal                              | Involves in angiogenesis, apoptosis, inflammation                                                                                                                                                                                                                                                                                                                                                          | [4]    |
| miR-30b-5p    | Retina during vasodegenerative phases of oxygen-induced retinopathy (OIR)  | Increased | Model for PDR                                              | Control animal                              |                                                                                                                                                                                                                                                                                                                                                                                                            | [4]    |
| miR-30d       | Aqueous and vitreous humor or plasma                                       | Decreased | DR/NPDR/PDR (mixed)                                        | Normal (without diabetic retinopathy)       | Result in GSE140959 (Aqueous and vitreous humor, plasma from DR/NPDR/PDR and compared with macular pucker or macular hole patients as normal, Ref. N6) was reanalysed                                                                                                                                                                                                                                      | [2, 3] |
| miR-30e       | Aqueous and vitreous humor or plasma                                       | Decreased | DR/NPDR/PDR (mixed)                                        | Normal (without diabetic retinopathy)       | Result in GSE140959 (Aqueous and vitreous humor, plasma from DR/NPDR/PDR and compared with macular pucker or macular hole patients as normal, Ref. N6) was reanalysed                                                                                                                                                                                                                                      | [2, 3] |
| miR-30e-3p    | Choroid during vasodegenerative phases of oxygen-induced retinopathy (OIR) | Increased | Model for PDR                                              | Control animal                              |                                                                                                                                                                                                                                                                                                                                                                                                            | [4]    |
| miR-3197      | serum                                                                      | Increased | DR                                                         | T2DM                                        |                                                                                                                                                                                                                                                                                                                                                                                                            | [24]   |
| miR-320a      | serum                                                                      | Increased | DR (T1DM)                                                  | T1D-noDR                                    |                                                                                                                                                                                                                                                                                                                                                                                                            | [1]    |
| miR-320a      | Vitreous humor                                                             | Increased | DR (T1DM)                                                  | T1D-noDR                                    |                                                                                                                                                                                                                                                                                                                                                                                                            | [1]    |
| miR-320a      | serum                                                                      | Increased | DR (T1DM)                                                  | Healthy control                             | Odds ratios for higher miR-320a ranged from 1.43-1.57 in different cohorts, the miRNA was implicated in angiogenesis                                                                                                                                                                                                                                                                                       | [22]   |
| miR-320a      | Aqueous and vitreous humor or plasma                                       | Increased | DR/NPDR/PDR (mixed)                                        | Normal (without diabetic retinopathy)       | Result in GSE140959 (Aqueous and vitreous humor, plasma from DR/NPDR/PDR and compared with macular pucker or macular hole patients as normal, Ref. N6) was reanalysed                                                                                                                                                                                                                                      | [2, 3] |
| miR-320a      | Plasma                                                                     | Decreased | DR                                                         | DM patients without DR and healthy subjects |                                                                                                                                                                                                                                                                                                                                                                                                            | [25]   |
| miR-320d-1    | Aqueous and vitreous humor or plasma                                       | Increased | DR/NPDR/PDR (mixed)                                        | Normal (without diabetic retinopathy)       | Result in GSE140959 (Aqueous and vitreous humor, plasma from DR/NPDR/PDR and compared with macular pucker or macular hole patients as normal, Ref. N6) was reanalysed                                                                                                                                                                                                                                      | [2, 3] |
| miR-320d-2    | Aqueous and vitreous humor or plasma                                       | Increased | DR/NPDR/PDR (mixed)                                        | Normal (without diabetic retinopathy)       | Result in GSE140959 (Aqueous and vitreous humor, plasma from DR/NPDR/PDR and compared with macular pucker or macular hole patients as normal, Ref. N6) was reanalysed                                                                                                                                                                                                                                      | [2, 3] |
| miR-335       | Retina during vasodegenerative phases of oxygen-induced retinopathy (OIR)  | Increased | Model for PDR                                              | Control animal                              |                                                                                                                                                                                                                                                                                                                                                                                                            | [4]    |
| miR-335       | Choroid during vasodegenerative phases of oxygen-induced retinopathy (OIR) | Increased | Model for PDR                                              | Control animal                              | Involves in angiogenesis , apoptosis, inflammation                                                                                                                                                                                                                                                                                                                                                         | [4]    |
| miR-34a       | Retinal tissues of DR rats and rat retinal vascular endothelial cells      | Increased | Retinal tissues of DR rats                                 | Untreated control                           | miR-34a promotes apoptosis of RVECs by targeting SIRT1 in DR rats                                                                                                                                                                                                                                                                                                                                          | [26]   |

|                   |                                                                                                                                                                                                                                  |           |                              |                                                        |                                                                                                                                                                                                    |        |
|-------------------|----------------------------------------------------------------------------------------------------------------------------------------------------------------------------------------------------------------------------------|-----------|------------------------------|--------------------------------------------------------|----------------------------------------------------------------------------------------------------------------------------------------------------------------------------------------------------|--------|
|                   | treated with high glucose                                                                                                                                                                                                        |           |                              |                                                        |                                                                                                                                                                                                    |        |
| miR-34a-5p        | Aqueous humor                                                                                                                                                                                                                    | Increased | diabetic macular edema (DME) | non-diabetic patients (CTR)                            |                                                                                                                                                                                                    | [5]    |
| miR-363           | Aqueous and vitreous humor or plasma                                                                                                                                                                                             | Decreased | DR/NPDR/PDR (mixed)          | Normal (without diabetic retinopathy)                  | Result in GSE140959 (Aqueous and vitreous humor, plasma from DR/NPDR/PDR and compared with macular pucker or macular hole patients as normal, Ref. N6) was reanalysed                              | [2, 3] |
| miR-365           | retinal tissues of DR mice                                                                                                                                                                                                       | Increased | retinal tissues of DR mice   | Control mice                                           | miR-365 targeted SIRT1, results in increased $\beta$ -catenin and GLUT1 expression and subsequent enhancement of Retinal microvascular endothelial cells proliferation and tube formation in vitro | [27]   |
| miR-365-3p        | Aqueous humor                                                                                                                                                                                                                    | Decreased | diabetic macular edema (DME) | non-diabetic patients (CTR)                            |                                                                                                                                                                                                    | [5]    |
| miR-374-5p        | Aqueous humor                                                                                                                                                                                                                    | Increased | diabetic macular edema (DME) | non-diabetic patients (CTR)                            |                                                                                                                                                                                                    | [5]    |
| miR-381-3p        | Retina and serum of animal                                                                                                                                                                                                       | Increased | diabetic C57BL/6J mice       | Control mice                                           |                                                                                                                                                                                                    | [6]    |
| miR-411           | Rat model and Retina of diabetic rat                                                                                                                                                                                             | Decreased | Retina of diabetic rat       | Nondiabetic rat                                        | ROBO4 is a target of miR-411. ROBO4 and could partially reverse the effects of high glucose and hypoxia on ARPE-19 cell viability and monolayer cell permeability                                  | [28]   |
| miR-423           | Plasma                                                                                                                                                                                                                           | Decreased | PDR                          | Healthy control                                        | Lowered miR-423 levels in diabetic patients showed a correlation with VEGF and an inverse correlation between NO and eNOS expression                                                               | [29]   |
| miR-423-5p        | Vitreous humor                                                                                                                                                                                                                   | Increased | PDR                          | MH eyes                                                |                                                                                                                                                                                                    | [1]    |
| miR-429           | Aqueous humor                                                                                                                                                                                                                    | Decreased | diabetic macular edema (DME) | non-diabetic patients (CTR)                            |                                                                                                                                                                                                    | [5]    |
| miR-451           | Aqueous and vitreous humor or plasma                                                                                                                                                                                             | Decreased | DR/NPDR/PDR (mixed)          | Normal (without diabetic retinopathy)                  | Result in GSE140959 (Aqueous and vitreous humor, plasma from DR/NPDR/PDR and compared with macular pucker or macular hole patients as normal, Ref. N6) was reanalysed                              | [2, 3] |
| miR-455           | Aqueous and vitreous humor or plasma                                                                                                                                                                                             | Increased | DR/NPDR/PDR (mixed)          | Normal (without diabetic retinopathy)                  | Result in GSE140959 (Aqueous and vitreous humor, plasma from DR/NPDR/PDR and compared with macular pucker or macular hole patients as normal, Ref. N6) was reanalysed                              | [2, 3] |
| miR-486           | Aqueous and vitreous humor or plasma                                                                                                                                                                                             | Decreased | DR/NPDR/PDR (mixed)          | Normal (without diabetic retinopathy)                  | Result in GSE140959 (Aqueous and vitreous humor, plasma from DR/NPDR/PDR and compared with macular pucker or macular hole patients as normal, Ref. N6) was reanalysed                              | [2, 3] |
| miR-502           | Aqueous and vitreous humor or plasma                                                                                                                                                                                             | Decreased | DR/NPDR/PDR (mixed)          | Normal (without diabetic retinopathy)                  | Result in GSE140959 (Aqueous and vitreous humor, plasma from DR/NPDR/PDR and compared with macular pucker or macular hole patients as normal, Ref. N6) was reanalysed                              | [2, 3] |
| miR-532           | Aqueous and vitreous humor or plasma                                                                                                                                                                                             | Decreased | DR/NPDR/PDR (mixed)          | Normal (without diabetic retinopathy)                  | Result in GSE140959 (Aqueous and vitreous humor, plasma from DR/NPDR/PDR and compared with macular pucker or macular hole patients as normal, Ref. N6) was reanalysed                              | [2, 3] |
| miR-660           | Aqueous and vitreous humor or plasma                                                                                                                                                                                             | Decreased | DR/NPDR/PDR (mixed)          | Normal (without diabetic retinopathy)                  | Result in GSE140959 (Aqueous and vitreous humor, plasma from DR/NPDR/PDR and compared with macular pucker or macular hole patients as normal, Ref. N6) was reanalysed                              | [2, 3] |
| miR-92a           | CD34+ cells from individuals with DR                                                                                                                                                                                             | Decreased | DR                           | control subjects and patients with diabetes with no DR |                                                                                                                                                                                                    | [30]   |
| miR-93            | Plasma                                                                                                                                                                                                                           | Increased | DR                           | T2DM patients without DR                               |                                                                                                                                                                                                    | [1]    |
| miR-93            | Vitreous humor                                                                                                                                                                                                                   | Increased | PDR                          | MH eyes                                                |                                                                                                                                                                                                    | [1]    |
| miR-96-5p         | Retina during vasodegenerative phases of oxygen-induced retinopathy (OIR)                                                                                                                                                        | Decreased | Model for PDR                | Control animal                                         | Involves in angiogenesis, apoptosis, inflammation                                                                                                                                                  | [4]    |
| miR-9a-5p         | Retina during vasodegenerative phases of oxygen-induced retinopathy (OIR)                                                                                                                                                        | Decreased | Model for PDR                | Control animal                                         |                                                                                                                                                                                                    | [4]    |
| miR-9a-5p         | Choroid during vasodegenerative phases of oxygen-induced retinopathy (OIR)                                                                                                                                                       | Increased | Model for PDR                | Control animal                                         |                                                                                                                                                                                                    | [4]    |
|                   |                                                                                                                                                                                                                                  |           |                              |                                                        |                                                                                                                                                                                                    |        |
|                   |                                                                                                                                                                                                                                  |           |                              |                                                        |                                                                                                                                                                                                    |        |
|                   |                                                                                                                                                                                                                                  |           |                              |                                                        |                                                                                                                                                                                                    |        |
|                   |                                                                                                                                                                                                                                  |           |                              |                                                        |                                                                                                                                                                                                    |        |
|                   |                                                                                                                                                                                                                                  |           |                              |                                                        |                                                                                                                                                                                                    |        |
|                   |                                                                                                                                                                                                                                  |           |                              |                                                        |                                                                                                                                                                                                    |        |
|                   |                                                                                                                                                                                                                                  |           |                              |                                                        |                                                                                                                                                                                                    |        |
| <b>References</b> |                                                                                                                                                                                                                                  |           |                              |                                                        |                                                                                                                                                                                                    |        |
| 1                 | Martinez B, Peplow P. MicroRNAs as biomarkers of diabetic retinopathy and disease progression. <i>Neural Regeneration Research</i> 2019; 14(11):1858-69.                                                                         |           |                              |                                                        |                                                                                                                                                                                                    |        |
| 2                 | Smit-McBride Z, Nguyen AT, Yu AK, Modjtahedi SP, Hunter AA, Rashid S, Moisseiev E, Morse LS. Unique molecular signatures of microRNAs in ocular fluids and plasma in diabetic retinopathy. <i>PLoS One</i> 2020; 15(7):e0235541. |           |                              |                                                        |                                                                                                                                                                                                    |        |
| 3                 | Kumari N, Karmakar A, Chakrabarti S, Ganesan SK. Integrative Computational Approach Revealed Crucial Genes Associated With Different Stages of Diabetic Retinopathy. <i>Front Genet</i> 2020; 11:576442.                         |           |                              |                                                        |                                                                                                                                                                                                    |        |
| 4                 | Desjarlais M, Rivera JC, Lahaie I, Cagnone G, Wirt M, Omri S, Chemtob S. MicroRNA expression profile in retina and choroid in oxygen-induced retinopathy model. <i>PLoS one</i> 2019; 14(6):e0218282-e.                          |           |                              |                                                        |                                                                                                                                                                                                    |        |

|    |                                                                                                                                                                                                                                                                                                                          |
|----|--------------------------------------------------------------------------------------------------------------------------------------------------------------------------------------------------------------------------------------------------------------------------------------------------------------------------|
| 5  | Grieco GE, Sebastiani G, Eandi CM, Neri G, Nigi L, Brusco N, D'Aurizio R, Posarelli M, Bacci T, Benedetto E, Fruschelli M, Orlandini M, Galvagni F, Dotta F, Tosi GM. MicroRNA Expression in the Aqueous Humor of Patients with Diabetic Macular Edema. <i>International journal of molecular sciences</i> 2020; 21(19). |
| 6  | Platania CBM, Maisto R, Trotta MC, D'Amico M, Rossi S, Gesualdo C, D'Amico G, Balta C, Herman H, Hermenean A, Ferraraccio F, Panarese I, Drago F, Bucolo C. Retinal and circulating miRNA expression patterns in diabetic retinopathy: An in silico and in vivo approach. <i>Br J Pharmacol</i> 2019; 176(13):2179-94.   |
| 7  | Maisto R, Trotta MC, Petrillo F, Izzo S, Cuomo G, Alfano R, Hermenean A, Barcia JM, Galdiero M, Platania CBM, Bucolo C, D'Amico M. Resolvin D1 Modulates the Intracellular VEGF-Related miRNAs of Retinal Photoreceptors Challenged With High Glucose. <i>Front Pharmacol</i> 2020; 11:235.                              |
| 8  | Pastukh N, Meerson A, Kalish D, Jabaly H, Blum A. Serum miR-122 levels correlate with diabetic retinopathy. <i>Clinical and Experimental Medicine</i> 2019; 19(2):255-60.                                                                                                                                                |
| 9  | Wang M, Zheng H, Zhou X, Zhang J, Shao G. miR-122 promotes diabetic retinopathy through targeting TIMP3. <i>Animal Cells and Systems</i> 2020; 24(5):275-81.                                                                                                                                                             |
| 10 | Zheng Y, Liu Y, Wang L, Xu H, Lu Z, Xuan Y, Meng W, Ye L, Fang D, Zhou Y, Ke K, Liu Y, An M. MicroRNA126 suppresses the proliferation and migration of endothelial cells in experimental diabetic retinopathy by targeting pololike kinase 4. <i>Int J Mol Med</i> 2021; 47(1):151-60.                                   |
| 11 | Wang J, Yao Y, Wang K, Li J, Chu T, Shen H. MicroRNA-148a-3p alleviates high glucose-induced diabetic retinopathy by targeting TGFB2 and FGF2. <i>Acta diabetologica</i> 2020; 57(12):1435-43.                                                                                                                           |
| 12 | Yang TT, Song SJ, Xue HB, Shi DF, Liu CM, Liu H. Regulatory T cells in the pathogenesis of type 2 diabetes mellitus retinopathy by miR-155. <i>Eur Rev Med Pharmacol Sci</i> 2015; 19(11):2010-5.                                                                                                                        |
| 13 | Yang Y, Liu Y, Li Y, Chen Z, Xiong Y, Zhou T, Tao W, Xu F, Yang H, Yla-Herttuala S, Chaurasia SS, Adam WC, Yang K. MicroRNA-15b Targets VEGF and Inhibits Angiogenesis in Proliferative Diabetic Retinopathy. <i>The Journal of clinical endocrinology and metabolism</i> 2020; 105(11).                                 |
| 14 | Guan JT, Li XX, Peng DW, Zhang WM, Qu J, Lu F, D'Amato RJ, Chi ZL. MicroRNA-18a-5p Administration Suppresses Retinal Neovascularization by Targeting FGF1 and HIF1A. <i>Front Pharmacol</i> 2020; 11:276.                                                                                                                |
| 15 | Xue L, Xiong C, Li J, Ren Y, Zhang L, Jiao K, Chen C, Ding P. miR-200-3p suppresses cell proliferation and reduces apoptosis in diabetic retinopathy via blocking the TGF-beta2/Smad pathway. <i>Biosci Rep</i> 2020; 40(11).                                                                                            |
| 16 | Li EH, Huang QZ, Li GC, Xiang ZY, Zhang X. Effects of miRNA-200b on the development of diabetic retinopathy by targeting VEGFA gene. <i>Biosci Rep</i> 2017; 37(2).                                                                                                                                                      |
| 17 | McArthur K, Feng B, Wu Y, Chen S, Chakrabarti S. MicroRNA-200b regulates vascular endothelial growth factor-mediated alterations in diabetic retinopathy. <i>Diabetes</i> 2011; 60(4):1314-23.                                                                                                                           |
| 18 | Yin C, Lin X, Sun Y, Ji X. Dysregulation of miR-210 is involved in the development of diabetic retinopathy and serves a regulatory role in retinal vascular endothelial cell proliferation. <i>Eur J Med Res</i> 2020; 25(1):20.                                                                                         |
| 19 | Ji H, Yi Q, Chen L, Wong L, Liu Y, Xu G, Zhao J, Huang T, Li B, Yang Y, Li W, Han L, Duan S. Circulating miR-3197 and miR-2116-5p as novel biomarkers for diabetic retinopathy. <i>Clinica chimica acta; international journal of clinical chemistry</i> 2020; 501:147-53.                                               |
| 20 | Liu Y, Xiao J, Zhao Y, Zhao C, Yang Q, Du X, Wang X. microRNA-216a protects against human retinal microvascular endothelial cell injury in diabetic retinopathy by suppressing the NOS2/JAK/STAT axis. <i>Experimental and Molecular Pathology</i> 2020; 115:104445.                                                     |
| 21 | Liu HN, Li X, Wu N, Tong MM, Chen S, Zhu SS, Qian W, Chen XL. Serum microRNA-221 as a biomarker for diabetic retinopathy in patients associated with type 2 diabetes. <i>Int J Ophthalmol</i> 2018; 11(12):1889-94.                                                                                                      |
| 22 | Zampetaki A, Willeit P, Burr S, Yin X, Langley SR, Kiechl S, Klein R, Rossing P, Chaturvedi N, Mayr M. Angiogenic microRNAs Linked to Incidence and Progression of Diabetic Retinopathy in Type 1 Diabetes. <i>Diabetes</i> 2016; 65(1):216.                                                                             |
| 23 | Torus B, Korkmaz H, Ozturk KH, FB SI, Argun M, Sevi KS, L TO. Downregulation of plasma microRNA-29c-3p expression may be a new risk factor for diabetic retinopathy. <i>Minerva Endocrinol</i> 2020.                                                                                                                     |
| 24 | Ji H, Yi Q, Chen L, Wong L, Liu Y, Xu G, Zhao J, Huang T, Li B, Yang Y, Li W, Han L, Duan S. Circulating miR-3197 and miR-2116-5p as novel biomarkers for diabetic retinopathy. <i>Clinica Chimica Acta</i> 2019.                                                                                                        |
| 25 | Prado MSG, de Jesus ML, de Goes TC, Mendonca LSO, Kaneto CM. Downregulation of circulating miR-320a and target gene prediction in patients with diabetic retinopathy. <i>BMC Res Notes</i> 2020; 13(1):155.                                                                                                              |
| 26 | Ji Q, Han J, Wang L, Liu J, Dong Y, Zhu K, Shi L. MicroRNA-34a promotes apoptosis of retinal vascular endothelial cells by targeting SIRT1 in rats with diabetic retinopathy. <i>Cell cycle</i> 2020; 19(21):2886-96.                                                                                                    |
| 27 | Wang J, Liang S, Guangming W, Zhao D, Qian C, Dong Y, Minghang P. A novel microRNA-365/SIRT1/beta-catenin/GLUT1 signaling axis affects the initiation of diabetic retinopathy. <i>Diabetes Metab Res Rev</i> 2020:e3428.                                                                                                 |
| 28 | Hu K, Li JL, Yuan XW. MicroRNA-45xUdHPiFHQ7xbKh19G45saF1raB2ot5pag8p1Hnk4yrfXRJZskr8TMbFpVfC5tDk8eQQg63TqkW9gKhwagx6HePTaK2yXbMed <i>Pharmacol Sci</i> 2019; 23(21):9171-9.                                                                                                                                              |
| 29 | Blum A, Meerson A, Rohana H, Jabaly H, Nahul N, Celesh D, Romanenko O, Tamir S. MicroRNA-423 may regulate diabetic vasculopathy. <i>Clinical and Experimental Medicine</i> 2019; 19(4):469-77.                                                                                                                           |
| 30 | Bhatwadekar AD, Yan Y, Stepps V, Hazra S, Korah M, Bartelmez S, Chaqour B, Grant MB. miR-92a Corrects CD34+ Cell Dysfunction in Diabetes by Modulating Core Circadian Genes Involved in Progenitor Differentiation. <i>Diabetes</i> 2015; 64(12):4226-37.                                                                |

**Supplementary Table ST2: PCR primer sequence used in the study**

| Primer name                 | Sequence (5' to 3')                                                            | References |
|-----------------------------|--------------------------------------------------------------------------------|------------|
| Universal stem-loop primer: | 5'GAAAGAAGGCGAGGAGCAGATCGAGGAAGAAGACGGAAGAAT<br>GTGCGTCTCGCCTTCTTTCNNNNNNNNN3' | [1]        |
| U6 RT primer:               | 5'CGCTTCACGAATTTGCGTGTCAB3'                                                    | [1]        |
| U6 qRT-PCR Forward primer:  | 5'GCTTCGGCAGCACATATACTAAAAT3'                                                  | [1]        |
| U6 qRT-PCR Reverse Primer:  | 5'CGCTTCACGAATTTGCGTGTCAT3'                                                    | [1]        |
| Universal Reverse Primer:   | 5'CGAGGAAGAAGACGGAAGAAT3'                                                      | [1]        |
| miR-126 Forward primer:     | 5'ACACTCCAGCTGGGTCGTACCGTGAGTAA3'                                              | [2]        |
| miR132 Forward primer#:     | 5'ACACTCCAGCTGGGTAACAGTCTACAGCCA3'                                             | [2].       |

#Sequence of miR-132 was taken from miRBase (<https://www.mirbase.org/index.shtml>). miR132 forward primer is self-designed but concept was adopted from Chen et al 2008 [2].

<sup>[1]</sup>Yang L-h, Wang S-l, Tang L-l, Liu B, Ye W-l, Wang L-l, et al. (2014) Universal Stem-Loop Primer Method for Screening and Quantification of MicroRNA. PLoS ONE 9: e115293. <https://doi.org/10.1371/journal.pone.0115293>

<sup>[2]</sup>Chen, X., Ba, Y., Ma, L. *et al.* (2008) Characterization of microRNAs in serum: a novel class of biomarkers for diagnosis of cancer and other diseases. *Cell Res* 18, 997–1006. <https://doi.org/10.1038/cr.2008.282>

**Supplementary Table ST3A Validated targets of miR-132 collected from miRTarBase (<http://mirtarbase.mbc.nctu.edu.tw/>)**

| miRTarBase ID | miRNA          | Target Gene    | Target Gene (Entrez Gene ID) | Experiments                                                                                 | References (PMID) |
|---------------|----------------|----------------|------------------------------|---------------------------------------------------------------------------------------------|-------------------|
| MIRT000333    | hsa-miR-132-3p | SIRT1          | 23411                        | Luciferase reporter assay//Western blot                                                     | 19819989          |
| MIRT000333    | hsa-miR-132-3p | SIRT1          | 23411                        | ChIP-seq//Immunoprecipitation//Luciferase reporter assay//Microarray//qRT-PCR//Western blot | 28383763          |
| MIRT000601    | hsa-miR-132-3p | CDKN1A         | 1026                         | qRT-PCR//Luciferase reporter assay//Western blot                                            | 20190813          |
| MIRT000601    | hsa-miR-132-3p | CDKN1A         | 1026                         | PAR-CLIP                                                                                    | 26701625          |
| MIRT000601    | hsa-miR-132-3p | CDKN1A         | 1026                         | PAR-CLIP                                                                                    | 27292025          |
| MIRT003926    | hsa-miR-132-3p | ARHGAP32       | 9743                         | qRT-PCR                                                                                     | 18082412          |
| MIRT003926    | hsa-miR-132-3p | ARHGAP32       | 9743                         | Luciferase reporter assay//Western blot                                                     | 18577589          |
| MIRT003926    | hsa-miR-132-3p | ARHGAP32       | 9743                         | Luciferase reporter assay                                                                   | 19850129          |
| MIRT006503    | hsa-miR-132-3p | RB1            | 5925                         | Luciferase reporter assay//Western blot//Reporter assay;Western blot;qRT-PCR                | 21329664          |
| MIRT006659    | hsa-miR-132-3p | HBEGF          | 1839                         | Luciferase reporter assay//Microarray//qRT-PCR//Western blot                                | 21853268          |
| MIRT006659    | hsa-miR-132-3p | HBEGF          | 1839                         | Luciferase reporter assay                                                                   | 22310291          |
| MIRT006659    | hsa-miR-132-3p | HBEGF          | 1839                         | Microarray                                                                                  | 17612493          |
| MIRT007010    | hsa-miR-132-3p | RASA1          | 5921                         | Immunoblot//Western blot                                                                    | 21868695          |
| MIRT007166    | hsa-miR-132-3p | CRK            | 1398                         | Luciferase reporter assay                                                                   | 23184980          |
| MIRT007166    | hsa-miR-132-3p | CRK            | 1398                         | Microarray                                                                                  | 17612493          |
| MIRT007167    | hsa-miR-132-3p | TJAP1          | 93643                        | Luciferase reporter assay                                                                   | 23184980          |
| MIRT007167    | hsa-miR-132-3p | TJAP1          | 93643                        | PAR-CLIP                                                                                    | 21572407          |
| MIRT007167    | hsa-miR-132-3p | TJAP1          | 93643                        | PAR-CLIP                                                                                    | 26701625          |
| MIRT007253    | hsa-miR-132-3p | TLN2           | 83660                        | Luciferase reporter assay                                                                   | 22310291          |
| MIRT007253    | hsa-miR-132-3p | TLN2           | 83660                        | Luciferase reporter assay                                                                   | 22330136          |
| MIRT021716    | hsa-miR-132-3p | ARL6IP6        | 151188                       | Microarray                                                                                  | 17612493          |
| MIRT021717    | hsa-miR-132-3p | COX8C          | 341947                       | Microarray                                                                                  | 17612493          |
| MIRT021718    | hsa-miR-132-3p | PIP5K1A        | 8394                         | Microarray                                                                                  | 17612493          |
| MIRT021719    | hsa-miR-132-3p | CDH3           | 1001                         | Microarray                                                                                  | 17612493          |
| MIRT021720    | hsa-miR-132-3p | LOXL1          | 4016                         | Microarray                                                                                  | 17612493          |
| MIRT021721    | hsa-miR-132-3p | TNFRSF17       | 608                          | Microarray                                                                                  | 17612493          |
| MIRT021722    | hsa-miR-132-3p | ADH1A          | 124                          | Microarray                                                                                  | 17612493          |
| MIRT021723    | hsa-miR-132-3p | KCTD4          | 386618                       | Microarray                                                                                  | 17612493          |
| MIRT021724    | hsa-miR-132-3p | PLPBP          | 11212                        | Microarray                                                                                  | 17612493          |
| MIRT021725    | hsa-miR-132-3p | WNT3A          | 89780                        | Microarray                                                                                  | 17612493          |
| MIRT021726    | hsa-miR-132-3p | KCNJ9          | 3765                         | Microarray                                                                                  | 17612493          |
| MIRT021727    | hsa-miR-132-3p | SMCHD1         | 23347                        | Microarray                                                                                  | 17612493          |
| MIRT021728    | hsa-miR-132-3p | KIR3DL1        | 3811                         | Microarray                                                                                  | 17612493          |
| MIRT021729    | hsa-miR-132-3p | ARF6           | 382                          | Microarray                                                                                  | 17612493          |
| MIRT021730    | hsa-miR-132-3p | PLSCR1         | 5359                         | Microarray                                                                                  | 17612493          |
| MIRT021731    | hsa-miR-132-3p | CSTF2T         | 23283                        | Microarray                                                                                  | 17612493          |
| MIRT021732    | hsa-miR-132-3p | TAF15          | 8148                         | Microarray                                                                                  | 17612493          |
| MIRT021733    | hsa-miR-132-3p | NR1D2          | 9975                         | Microarray                                                                                  | 17612493          |
| MIRT021734    | hsa-miR-132-3p | EPHA4          | 2043                         | Microarray                                                                                  | 17612493          |
| MIRT021735    | hsa-miR-132-3p | RTEL1-TNFRSF6B | 100533107                    | Microarray                                                                                  | 17612493          |



|            |                |          |        |            |          |
|------------|----------------|----------|--------|------------|----------|
| MIRT021736 | hsa-miR-132-3p | MUC17    | 140453 | Microarray | 17612493 |
| MIRT021737 | hsa-miR-132-3p | CA1      | 759    | Microarray | 17612493 |
| MIRT021738 | hsa-miR-132-3p | S100A1   | 6271   | Microarray | 17612493 |
| MIRT021739 | hsa-miR-132-3p | FKBP10   | 60681  | Microarray | 17612493 |
| MIRT021740 | hsa-miR-132-3p | PLA2G4C  | 8605   | Microarray | 17612493 |
| MIRT021741 | hsa-miR-132-3p | GSTCD    | 79807  | Microarray | 17612493 |
| MIRT021742 | hsa-miR-132-3p | LIG4     | 3981   | Microarray | 17612493 |
| MIRT021743 | hsa-miR-132-3p | POLK     | 51426  | Microarray | 17612493 |
| MIRT021744 | hsa-miR-132-3p | STMN1    | 3925   | Microarray | 17612493 |
| MIRT021745 | hsa-miR-132-3p | DMGDH    | 29958  | Microarray | 17612493 |
| MIRT021746 | hsa-miR-132-3p | MLLT10   | 8028   | Microarray | 17612493 |
| MIRT021747 | hsa-miR-132-3p | TRIM36   | 55521  | Microarray | 17612493 |
| MIRT021748 | hsa-miR-132-3p | EOGT     | 285203 | Microarray | 17612493 |
| MIRT021749 | hsa-miR-132-3p | ANKRD28  | 23243  | Microarray | 17612493 |
| MIRT021750 | hsa-miR-132-3p | GCNT1    | 2650   | Microarray | 17612493 |
| MIRT021751 | hsa-miR-132-3p | HACD3    | 51495  | Microarray | 17612493 |
| MIRT021752 | hsa-miR-132-3p | SSR3     | 6747   | Microarray | 17612493 |
| MIRT021753 | hsa-miR-132-3p | KBTBD3   | 143879 | Microarray | 17612493 |
| MIRT021754 | hsa-miR-132-3p | SYT14    | 255928 | Microarray | 17612493 |
| MIRT021755 | hsa-miR-132-3p | MAP1B    | 4131   | Microarray | 17612493 |
| MIRT021756 | hsa-miR-132-3p | YKT6     | 10652  | Microarray | 17612493 |
| MIRT021757 | hsa-miR-132-3p | CD55     | 1604   | Microarray | 17612493 |
| MIRT021758 | hsa-miR-132-3p | AASDHPPT | 60496  | Microarray | 17612493 |
| MIRT021759 | hsa-miR-132-3p | UBE2W    | 55284  | Microarray | 17612493 |
| MIRT021760 | hsa-miR-132-3p | NIPSNAP2 | 2631   | Microarray | 17612493 |
| MIRT021761 | hsa-miR-132-3p | TMEM47   | 83604  | Microarray | 17612493 |
| MIRT021762 | hsa-miR-132-3p | BNIP2    | 663    | Microarray | 17612493 |
| MIRT021763 | hsa-miR-132-3p | ZNF652   | 22834  | Microarray | 17612493 |
| MIRT021764 | hsa-miR-132-3p | FAM199X  | 139231 | Microarray | 17612493 |
| MIRT021765 | hsa-miR-132-3p | FAM81A   | 145773 | Microarray | 17612493 |
| MIRT021766 | hsa-miR-132-3p | CHRNA5   | 1138   | Microarray | 17612493 |
| MIRT021767 | hsa-miR-132-3p | FRY      | 10129  | Microarray | 17612493 |
| MIRT021768 | hsa-miR-132-3p | PTGS2    | 5743   | Microarray | 17612493 |
| MIRT021769 | hsa-miR-132-3p | TUSC2    | 11334  | Microarray | 17612493 |
| MIRT021770 | hsa-miR-132-3p | OSBPL8   | 114882 | Microarray | 17612493 |
| MIRT021771 | hsa-miR-132-3p | CTDSPL2  | 51496  | Microarray | 17612493 |
| MIRT021772 | hsa-miR-132-3p | MEF2A    | 4205   | Microarray | 17612493 |
| MIRT021773 | hsa-miR-132-3p | PSMD12   | 5718   | Microarray | 17612493 |
| MIRT021774 | hsa-miR-132-3p | SPAST    | 6683   | Microarray | 17612493 |
| MIRT021775 | hsa-miR-132-3p | ATP6V0E1 | 8992   | Microarray | 17612493 |
| MIRT021776 | hsa-miR-132-3p | PRSS22   | 64063  | Microarray | 17612493 |
| MIRT021777 | hsa-miR-132-3p | SH3BGRL  | 6451   | Microarray | 17612493 |

|            |                |           |        |            |          |
|------------|----------------|-----------|--------|------------|----------|
| MIRT021778 | hsa-miR-132-3p | KRT6C     | 286887 | Microarray | 17612493 |
| MIRT021779 | hsa-miR-132-3p | CST9L     | 128821 | Microarray | 17612493 |
| MIRT021780 | hsa-miR-132-3p | EBPL      | 84650  | Microarray | 17612493 |
| MIRT021781 | hsa-miR-132-3p | SYNE3     | 161176 | Microarray | 17612493 |
| MIRT021782 | hsa-miR-132-3p | FAM221B   | 392307 | Microarray | 17612493 |
| MIRT021783 | hsa-miR-132-3p | GATA3     | 2625   | Microarray | 17612493 |
| MIRT021784 | hsa-miR-132-3p | EMILIN3   | 90187  | Microarray | 17612493 |
| MIRT021785 | hsa-miR-132-3p | ARL13B    | 200894 | Microarray | 17612493 |
| MIRT021786 | hsa-miR-132-3p | CYP26A1   | 1592   | Microarray | 17612493 |
| MIRT021787 | hsa-miR-132-3p | SAMSN1    | 64092  | Microarray | 17612493 |
| MIRT021788 | hsa-miR-132-3p | GNL3L     | 54552  | Microarray | 17612493 |
| MIRT021789 | hsa-miR-132-3p | ETNK2     | 55224  | Microarray | 17612493 |
| MIRT021790 | hsa-miR-132-3p | DEPDC7    | 91614  | Microarray | 17612493 |
| MIRT021791 | hsa-miR-132-3p | FGF22     | 27006  | Microarray | 17612493 |
| MIRT021792 | hsa-miR-132-3p | FUT1      | 2523   | Microarray | 17612493 |
| MIRT021793 | hsa-miR-132-3p | KRTAP4-11 | 653240 | Microarray | 17612493 |
| MIRT021794 | hsa-miR-132-3p | SEC61A1   | 29927  | Microarray | 17612493 |
| MIRT021795 | hsa-miR-132-3p | CR2       | 1380   | Microarray | 17612493 |
| MIRT021796 | hsa-miR-132-3p | MMP13     | 4322   | Microarray | 17612493 |
| MIRT021797 | hsa-miR-132-3p | SYNDIG1L  | 646658 | Microarray | 17612493 |
| MIRT021798 | hsa-miR-132-3p | TFPI      | 7035   | Microarray | 17612493 |
| MIRT021799 | hsa-miR-132-3p | RNF128    | 79589  | Microarray | 17612493 |
| MIRT021800 | hsa-miR-132-3p | SFXN2     | 118980 | Microarray | 17612493 |
| MIRT021801 | hsa-miR-132-3p | PSMA2     | 5683   | Microarray | 17612493 |
| MIRT021801 | hsa-miR-132-3p | PSMA2     | 5683   | PAR-CLIP   | 23446348 |
| MIRT021801 | hsa-miR-132-3p | PSMA2     | 5683   | PAR-CLIP   | 20371350 |
| MIRT021802 | hsa-miR-132-3p | FABP7     | 2173   | Microarray | 17612493 |
| MIRT021803 | hsa-miR-132-3p | CNTNAP1   | 8506   | Microarray | 17612493 |
| MIRT021804 | hsa-miR-132-3p | FBN3      | 84467  | Microarray | 17612493 |
| MIRT021805 | hsa-miR-132-3p | KIR3DL2   | 3812   | Microarray | 17612493 |
| MIRT021806 | hsa-miR-132-3p | LFNG      | 3955   | Microarray | 17612493 |
| MIRT021807 | hsa-miR-132-3p | B3GAT1    | 27087  | Microarray | 17612493 |
| MIRT021808 | hsa-miR-132-3p | ARR3      | 407    | Microarray | 17612493 |
| MIRT021809 | hsa-miR-132-3p | GK        | 2710   | Microarray | 17612493 |
| MIRT021810 | hsa-miR-132-3p | SMN1      | 6606   | Microarray | 17612493 |
| MIRT021811 | hsa-miR-132-3p | ALK       | 238    | Microarray | 17612493 |
| MIRT021812 | hsa-miR-132-3p | PRX       | 57716  | Microarray | 17612493 |
| MIRT021813 | hsa-miR-132-3p | CYP2E1    | 1571   | Microarray | 17612493 |
| MIRT021814 | hsa-miR-132-3p | ADAMTSL1  | 92949  | Microarray | 17612493 |
| MIRT021815 | hsa-miR-132-3p | NCS1      | 23413  | Microarray | 17612493 |
| MIRT021816 | hsa-miR-132-3p | CFTR      | 1080   | Microarray | 17612493 |
| MIRT021817 | hsa-miR-132-3p | OAS2      | 4939   | Microarray | 17612493 |

|            |                |         |           |                                         |          |
|------------|----------------|---------|-----------|-----------------------------------------|----------|
| MIRT021818 | hsa-miR-132-3p | C8orf33 | 65265     | Microarray                              | 17612493 |
| MIRT021819 | hsa-miR-132-3p | FAT4    | 79633     | Microarray                              | 17612493 |
| MIRT021820 | hsa-miR-132-3p | ADGRF4  | 221393    | Microarray                              | 17612493 |
| MIRT021821 | hsa-miR-132-3p | ZDHHC2  | 51201     | Microarray                              | 17612493 |
| MIRT021822 | hsa-miR-132-3p | INTS8   | 55656     | Microarray                              | 17612493 |
| MIRT021823 | hsa-miR-132-3p | IMPA1   | 3612      | Microarray                              | 17612493 |
| MIRT021824 | hsa-miR-132-3p | FAT3    | 120114    | Microarray                              | 17612493 |
| MIRT021825 | hsa-miR-132-3p | VPS13D  | 55187     | Microarray                              | 17612493 |
| MIRT021826 | hsa-miR-132-3p | DOCK10  | 55619     | Microarray                              | 17612493 |
| MIRT021827 | hsa-miR-132-3p | LCA5    | 167691    | Microarray                              | 17612493 |
| MIRT021828 | hsa-miR-132-3p | ARL14EP | 120534    | Microarray                              | 17612493 |
| MIRT021829 | hsa-miR-132-3p | MTMR10  | 54893     | Microarray                              | 17612493 |
| MIRT021830 | hsa-miR-132-3p | TRIM23  | 373       | Microarray                              | 17612493 |
| MIRT021831 | hsa-miR-132-3p | CHL1    | 10752     | Microarray                              | 17612493 |
| MIRT021832 | hsa-miR-132-3p | NDUFB10 | 4716      | Microarray                              | 17612493 |
| MIRT021833 | hsa-miR-132-3p | NBN     | 4683      | Microarray                              | 17612493 |
| MIRT021834 | hsa-miR-132-3p | THBS1   | 7057      | Microarray                              | 17612493 |
| MIRT021835 | hsa-miR-132-3p | GJE1    | 100126572 | Microarray                              | 17612493 |
| MIRT021836 | hsa-miR-132-3p | SNX7    | 51375     | Microarray                              | 17612493 |
| MIRT021837 | hsa-miR-132-3p | EYA4    | 2070      | Microarray                              | 17612493 |
| MIRT021838 | hsa-miR-132-3p | CASP7   | 840       | Microarray                              | 17612493 |
| MIRT021839 | hsa-miR-132-3p | ECT2    | 1894      | Microarray                              | 17612493 |
| MIRT021840 | hsa-miR-132-3p | EXOC5   | 10640     | Microarray                              | 17612493 |
| MIRT021841 | hsa-miR-132-3p | CD164   | 8763      | Microarray                              | 17612493 |
| MIRT021842 | hsa-miR-132-3p | STAU1   | 6780      | Microarray                              | 17612493 |
| MIRT021843 | hsa-miR-132-3p | ANKRD29 | 147463    | Microarray                              | 17612493 |
| MIRT021844 | hsa-miR-132-3p | CCSER2  | 54462     | Microarray                              | 17612493 |
| MIRT021845 | hsa-miR-132-3p | RTN4    | 57142     | Microarray                              | 17612493 |
| MIRT021846 | hsa-miR-132-3p | MDFIC   | 29969     | Microarray                              | 17612493 |
| MIRT021847 | hsa-miR-132-3p | ZNF236  | 7776      | Microarray                              | 17612493 |
| MIRT021848 | hsa-miR-132-3p | SDF2    | 6388      | Microarray                              | 17612493 |
| MIRT021849 | hsa-miR-132-3p | SPRED1  | 161742    | Microarray                              | 17612493 |
| MIRT021849 | hsa-miR-132-3p | SPRED1  | 161742    | Luciferase reporter assay//Western blot | 25945589 |
| MIRT021850 | hsa-miR-132-3p | CMTM3   | 123920    | Microarray                              | 17612493 |
| MIRT021851 | hsa-miR-132-3p | MAP3K3  | 4215      | Microarray                              | 17612493 |
| MIRT021852 | hsa-miR-132-3p | ACTR2   | 10097     | Microarray                              | 17612493 |
| MIRT021853 | hsa-miR-132-3p | NAP1L1  | 4673      | Microarray                              | 17612493 |
| MIRT021854 | hsa-miR-132-3p | FBXO28  | 23219     | Microarray                              | 17612493 |
| MIRT021855 | hsa-miR-132-3p | LGR4    | 55366     | Microarray                              | 17612493 |
| MIRT021856 | hsa-miR-132-3p | ZNF148  | 7707      | Microarray                              | 17612493 |
| MIRT021857 | hsa-miR-132-3p | TBC1D9  | 23158     | Microarray                              | 17612493 |
| MIRT021858 | hsa-miR-132-3p | VDAC2   | 7417      | Microarray                              | 17612493 |

|            |                |         |        |                                                                        |          |
|------------|----------------|---------|--------|------------------------------------------------------------------------|----------|
| MIRT021859 | hsa-miR-132-3p | CC2D1B  | 200014 | Microarray                                                             | 17612493 |
| MIRT021860 | hsa-miR-132-3p | MUC13   | 56667  | Microarray                                                             | 17612493 |
| MIRT021860 | hsa-miR-132-3p | MUC13   | 56667  | Immunohistochemistry//Luciferase reporter assay//qRT-PCR//Western blot | 28339011 |
| MIRT021861 | hsa-miR-132-3p | TSPAN6  | 7105   | Microarray                                                             | 17612493 |
| MIRT021862 | hsa-miR-132-3p | GTF2H1  | 2965   | Microarray                                                             | 17612493 |
| MIRT021863 | hsa-miR-132-3p | CALU    | 813    | Microarray                                                             | 17612493 |
| MIRT021864 | hsa-miR-132-3p | CAMSAP2 | 23271  | Microarray                                                             | 17612493 |
| MIRT021865 | hsa-miR-132-3p | CCNA2   | 890    | Western blot;qRT-PCR                                                   | 21329664 |
| MIRT021866 | hsa-miR-132-3p | CCNB1   | 891    | Western blot;qRT-PCR                                                   | 21329664 |
| MIRT045838 | hsa-miR-132-3p | PARP10  | 84875  | CLASH                                                                  | 23622248 |
| MIRT045839 | hsa-miR-132-3p | RPL7    | 6129   | CLASH                                                                  | 23622248 |
| MIRT045840 | hsa-miR-132-3p | FOXO1   | 2308   | CLASH                                                                  | 23622248 |
| MIRT045840 | hsa-miR-132-3p | FOXO1   | 2308   | Luciferase reporter assay//qRT-PCR//Western blot                       | 26298723 |
| MIRT045840 | hsa-miR-132-3p | FOXO1   | 2308   | Luciferase reporter assay//Western blot                                | 27556448 |
| MIRT045841 | hsa-miR-132-3p | RACK1   | 10399  | CLASH                                                                  | 23622248 |
| MIRT045842 | hsa-miR-132-3p | CSTF3   | 1479   | CLASH                                                                  | 23622248 |
| MIRT045843 | hsa-miR-132-3p | RPSA    | 3921   | CLASH                                                                  | 23622248 |
| MIRT045844 | hsa-miR-132-3p | ANXA2   | 302    | CLASH                                                                  | 23622248 |
| MIRT045845 | hsa-miR-132-3p | NCKAP1  | 10787  | CLASH                                                                  | 23622248 |
| MIRT045846 | hsa-miR-132-3p | RPS5    | 6193   | CLASH                                                                  | 23622248 |
| MIRT045847 | hsa-miR-132-3p | IRAK1   | 3654   | CLASH                                                                  | 23622248 |
| MIRT045848 | hsa-miR-132-3p | PDLIM7  | 9260   | CLASH                                                                  | 23622248 |
| MIRT054502 | hsa-miR-132-3p | BDNF    | 627    | qRT-PCR//Western blotting                                              | 23704927 |
| MIRT054835 | hsa-miR-132-3p | JPT1    | 51155  | Luciferase reporter assay//QRTPCR//Microarray//Western blot            | 25538559 |
| MIRT054836 | hsa-miR-132-3p | KLHL11  | 55175  | Luciferase reporter assay//QRTPCR//Microarray//Western blot            | 25538559 |
| MIRT054837 | hsa-miR-132-3p | MAPK1   | 5594   | Luciferase reporter assay//QRTPCR//Microarray//Western blot            | 25538559 |
| MIRT054894 | hsa-miR-132-3p | SOX5    | 6660   | Luciferase reporter assay//Western blot                                | 25305446 |
| MIRT091255 | hsa-miR-132-3p | FXR1    | 8087   | PAR-CLIP                                                               | 23446348 |
| MIRT091255 | hsa-miR-132-3p | FXR1    | 8087   | PAR-CLIP                                                               | 20371350 |
| MIRT091255 | hsa-miR-132-3p | FXR1    | 8087   | PAR-CLIP                                                               | 26701625 |
| MIRT100367 | hsa-miR-132-3p | HSPA1B  | 3304   | PAR-CLIP                                                               | 21572407 |
| MIRT106174 | hsa-miR-132-3p | RRS1    | 23212  | PAR-CLIP                                                               | 21572407 |
| MIRT149855 | hsa-miR-132-3p | LDLR    | 3949   | PAR-CLIP                                                               | 21572407 |
| MIRT217679 | hsa-miR-132-3p | ASF1A   | 25842  | PAR-CLIP                                                               | 21572407 |
| MIRT259587 | hsa-miR-132-3p | EIF2S3  | 1968   | PAR-CLIP                                                               | 20371350 |
| MIRT289307 | hsa-miR-132-3p | TNRC6C  | 57690  | HITS-CLIP                                                              | 19536157 |
| MIRT368374 | hsa-miR-132-3p | ARID2   | 196528 | PAR-CLIP                                                               | 23592263 |
| MIRT438882 | hsa-miR-132-3p | IRAK4   | 51135  | Luciferase reporter assay                                              | 23264652 |
| MIRT442189 | hsa-miR-132-3p | HOOK3   | 84376  | PAR-CLIP                                                               | 22100165 |
| MIRT449483 | hsa-miR-132-3p | STAG1   | 10274  | PAR-CLIP                                                               | 22100165 |
| MIRT453131 | hsa-miR-132-3p | HOXC4   | 3221   | PAR-CLIP                                                               | 23592263 |
| MIRT455372 | hsa-miR-132-3p | KDM5C   | 8242   | PAR-CLIP                                                               | 23592263 |

|            |                |          |        |                     |          |
|------------|----------------|----------|--------|---------------------|----------|
| MIRT455526 | hsa-miR-132-3p | C6orf106 | 64771  | PAR-CLIP            | 23592263 |
| MIRT458882 | hsa-miR-132-3p | PFAS     | 5198   | PAR-CLIP            | 23592263 |
| MIRT464180 | hsa-miR-132-3p | VMP1     | 81671  | PAR-CLIP            | 23592263 |
| MIRT464180 | hsa-miR-132-3p | VMP1     | 81671  | PAR-CLIP            | 23446348 |
| MIRT464180 | hsa-miR-132-3p | VMP1     | 81671  | PAR-CLIP//HITS-CLIP | 21572407 |
| MIRT464180 | hsa-miR-132-3p | VMP1     | 81671  | PAR-CLIP            | 20371350 |
| MIRT464180 | hsa-miR-132-3p | VMP1     | 81671  | HITS-CLIP           | 24906430 |
| MIRT464180 | hsa-miR-132-3p | VMP1     | 81671  | HITS-CLIP           | 23824327 |
| MIRT464180 | hsa-miR-132-3p | VMP1     | 81671  | HITS-CLIP           | 23706177 |
| MIRT464180 | hsa-miR-132-3p | VMP1     | 81671  | HITS-CLIP           | 23313552 |
| MIRT464180 | hsa-miR-132-3p | VMP1     | 81671  | HITS-CLIP           | 22927820 |
| MIRT464180 | hsa-miR-132-3p | VMP1     | 81671  | HITS-CLIP           | 19536157 |
| MIRT464180 | hsa-miR-132-3p | VMP1     | 81671  | PAR-CLIP            | 26701625 |
| MIRT464180 | hsa-miR-132-3p | VMP1     | 81671  | PAR-CLIP            | 27292025 |
| MIRT464180 | hsa-miR-132-3p | VMP1     | 81671  | HITS-CLIP           | 27418678 |
| MIRT464180 | hsa-miR-132-3p | VMP1     | 81671  | HITS-CLIP           | 28735896 |
| MIRT467690 | hsa-miR-132-3p | SLC38A2  | 54407  | PAR-CLIP            | 23592263 |
| MIRT467690 | hsa-miR-132-3p | SLC38A2  | 54407  | PAR-CLIP            | 21572407 |
| MIRT476656 | hsa-miR-132-3p | FZD6     | 8323   | PAR-CLIP            | 23592263 |
| MIRT476656 | hsa-miR-132-3p | FZD6     | 8323   | PAR-CLIP            | 21572407 |
| MIRT477439 | hsa-miR-132-3p | EML4     | 27436  | PAR-CLIP            | 23592263 |
| MIRT477439 | hsa-miR-132-3p | EML4     | 27436  | PAR-CLIP            | 21572407 |
| MIRT479294 | hsa-miR-132-3p | CHAC1    | 79094  | PAR-CLIP            | 23592263 |
| MIRT485291 | hsa-miR-132-3p | PLAGL2   | 5326   | PAR-CLIP            | 23592263 |
| MIRT485291 | hsa-miR-132-3p | PLAGL2   | 5326   | PAR-CLIP            | 26701625 |
| MIRT495258 | hsa-miR-132-3p | BMPER    | 168667 | PAR-CLIP            | 23708386 |
| MIRT497153 | hsa-miR-132-3p | PRDM15   | 63977  | PAR-CLIP            | 22291592 |
| MIRT500830 | hsa-miR-132-3p | ELOC     | 6921   | PAR-CLIP            | 24398324 |
| MIRT500830 | hsa-miR-132-3p | ELOC     | 6921   | PAR-CLIP            | 26701625 |
| MIRT500830 | hsa-miR-132-3p | ELOC     | 6921   | PAR-CLIP            | 27292025 |
| MIRT506948 | hsa-miR-132-3p | HS3ST3B1 | 9953   | PAR-CLIP            | 23446348 |
| MIRT506948 | hsa-miR-132-3p | HS3ST3B1 | 9953   | PAR-CLIP            | 22012620 |
| MIRT506948 | hsa-miR-132-3p | HS3ST3B1 | 9953   | PAR-CLIP            | 26701625 |
| MIRT506948 | hsa-miR-132-3p | HS3ST3B1 | 9953   | PAR-CLIP            | 27292025 |
| MIRT507623 | hsa-miR-132-3p | CRTC1    | 23373  | PAR-CLIP            | 23446348 |
| MIRT508137 | hsa-miR-132-3p | AMD1     | 262    | PAR-CLIP            | 23446348 |
| MIRT508137 | hsa-miR-132-3p | AMD1     | 262    | PAR-CLIP            | 27292025 |
| MIRT526271 | hsa-miR-132-3p | CCDC169  | 728591 | PAR-CLIP            | 22012620 |
| MIRT526867 | hsa-miR-132-3p | PARP11   | 57097  | PAR-CLIP            | 22012620 |
| MIRT532420 | hsa-miR-132-3p | ART4     | 420    | PAR-CLIP            | 22012620 |
| MIRT532508 | hsa-miR-132-3p | TWISTNB  | 221830 | PAR-CLIP            | 22012620 |
| MIRT532508 | hsa-miR-132-3p | TWISTNB  | 221830 | PAR-CLIP            | 20371350 |

|            |                |          |           |                                                                        |          |
|------------|----------------|----------|-----------|------------------------------------------------------------------------|----------|
| MIRT534833 | hsa-miR-132-3p | RAB18    | 22931     | PAR-CLIP                                                               | 22012620 |
| MIRT542577 | hsa-miR-132-3p | ZNF280B  | 140883    | PAR-CLIP                                                               | 21572407 |
| MIRT546160 | hsa-miR-132-3p | TSPAN12  | 23554     | PAR-CLIP                                                               | 21572407 |
| MIRT547255 | hsa-miR-132-3p | NUP50    | 10762     | PAR-CLIP                                                               | 21572407 |
| MIRT547255 | hsa-miR-132-3p | NUP50    | 10762     | PAR-CLIP                                                               | 20371350 |
| MIRT547614 | hsa-miR-132-3p | LIFR     | 3977      | PAR-CLIP                                                               | 21572407 |
| MIRT547705 | hsa-miR-132-3p | KPNA1    | 3836      | PAR-CLIP                                                               | 21572407 |
| MIRT547705 | hsa-miR-132-3p | KPNA1    | 3836      | PAR-CLIP                                                               | 20371350 |
| MIRT549141 | hsa-miR-132-3p | BRWD1    | 54014     | PAR-CLIP                                                               | 21572407 |
| MIRT549455 | hsa-miR-132-3p | ACSL4    | 2182      | PAR-CLIP//HITS-CLIP                                                    | 21572407 |
| MIRT551640 | hsa-miR-132-3p | TRUB1    | 142940    | PAR-CLIP                                                               | 21572407 |
| MIRT551640 | hsa-miR-132-3p | TRUB1    | 142940    | PAR-CLIP                                                               | 20371350 |
| MIRT554985 | hsa-miR-132-3p | RAB5B    | 5869      | PAR-CLIP                                                               | 21572407 |
| MIRT554985 | hsa-miR-132-3p | RAB5B    | 5869      | PAR-CLIP                                                               | 26701625 |
| MIRT555924 | hsa-miR-132-3p | OCLN     | 100506658 | PAR-CLIP                                                               | 21572407 |
| MIRT555924 | hsa-miR-132-3p | OCLN     | 100506658 | PAR-CLIP                                                               | 20371350 |
| MIRT557610 | hsa-miR-132-3p | GNB1     | 2782      | PAR-CLIP                                                               | 21572407 |
| MIRT571512 | hsa-miR-132-3p | ZNF711   | 7552      | PAR-CLIP                                                               | 20371350 |
| MIRT572928 | hsa-miR-132-3p | PRAMEF1  | 65121     | PAR-CLIP                                                               | 20371350 |
| MIRT573617 | hsa-miR-132-3p | ZNF724   | 440519    | PAR-CLIP                                                               | 20371350 |
| MIRT614465 | hsa-miR-132-3p | ALKBH4   | 54784     | HITS-CLIP                                                              | 23824327 |
| MIRT623025 | hsa-miR-132-3p | OLFML2A  | 169611    | HITS-CLIP                                                              | 23824327 |
| MIRT639080 | hsa-miR-132-3p | CD226    | 10666     | HITS-CLIP                                                              | 23824327 |
| MIRT642134 | hsa-miR-132-3p | CYP20A1  | 57404     | HITS-CLIP                                                              | 23824327 |
| MIRT653734 | hsa-miR-132-3p | SLC25A32 | 81034     | HITS-CLIP                                                              | 23824327 |
| MIRT655167 | hsa-miR-132-3p | PHF20L1  | 51105     | HITS-CLIP                                                              | 23824327 |
| MIRT680989 | hsa-miR-132-3p | DCAF17   | 80067     | HITS-CLIP                                                              | 23706177 |
| MIRT681564 | hsa-miR-132-3p | UBXN2A   | 165324    | HITS-CLIP                                                              | 23706177 |
| MIRT681564 | hsa-miR-132-3p | UBXN2A   | 165324    | PAR-CLIP                                                               | 27292025 |
| MIRT696294 | hsa-miR-132-3p | IER3IP1  | 51124     | HITS-CLIP                                                              | 23313552 |
| MIRT697724 | hsa-miR-132-3p | USP8     | 9101      | HITS-CLIP                                                              | 23313552 |
| MIRT703296 | hsa-miR-132-3p | GID4     | 79018     | HITS-CLIP                                                              | 23313552 |
| MIRT718422 | hsa-miR-132-3p | CALN1    | 83698     | HITS-CLIP                                                              | 19536157 |
| MIRT719460 | hsa-miR-132-3p | APBA1    | 320       | HITS-CLIP                                                              | 19536157 |
| MIRT731713 | hsa-miR-132-3p | EGFR     | 1956      | Immunohistochemistry//Luciferase reporter assay//qRT-PCR//Western blot | 26452132 |
| MIRT731714 | hsa-miR-132-3p | RAF1     | 5894      | Immunohistochemistry//Luciferase reporter assay//qRT-PCR//Western blot | 26452132 |
| MIRT732559 | hsa-miR-132-3p | SOX4     | 6659      | Immunoprecipitaion//Luciferase reporter assay//qRT-PCR//Western blot   | 26377202 |
| MIRT732595 | hsa-miR-132-3p | FGF2     | 2247      | qRT-PCR                                                                | 25864118 |
| MIRT733351 | hsa-miR-132-3p | SPRY1    | 10252     | Luciferase reporter assay//Western blot                                | 25945589 |
| MIRT733764 | hsa-miR-132-3p | MMP9     | 4318      | Luciferase reporter assay                                              | 26319558 |
| MIRT733928 | hsa-miR-132-3p | YY1AP1   | 55249     | Luciferase reporter assay//qRT-PCR//Western blot                       | 26096363 |
| MIRT734062 | hsa-miR-132-3p | AGO2     | 27161     | Immunoblot//Luciferase reporter assay//qRT-PCR                         | 26475020 |

|            |                |         |       |                                                  |          |
|------------|----------------|---------|-------|--------------------------------------------------|----------|
| MIRT734812 | hsa-miR-132-3p | SOX6    | 55553 | Luciferase reporter assay//Western blot          | 27556448 |
| MIRT734813 | hsa-miR-132-3p | GDF5    | 8200  | Luciferase reporter assay//Western blot          | 27556448 |
| MIRT734832 | hsa-miR-132-3p | PIK3R3  | 8503  | Luciferase reporter assay//qRT-PCR//Western blot | 26252738 |
| MIRT735158 | hsa-miR-132-3p | SMAD2   | 4087  | GFP reporter assay//qRT-PCR//Western blot        | 25988335 |
| MIRT735435 | hsa-miR-132-3p | SLC2A1  | 6513  | Luciferase reporter assay//qRT-PCR//Western blot | 27398313 |
| MIRT737386 | hsa-miR-132-3p | DAZAP2  | 9802  | PAR-CLIP                                         | 26701625 |
| MIRT737386 | hsa-miR-132-3p | DAZAP2  | 9802  | PAR-CLIP                                         | 27292025 |
| MIRT737387 | hsa-miR-132-3p | SETD5   | 55209 | PAR-CLIP                                         | 26701625 |
| MIRT762535 | hsa-miR-132-3p | GMNN    | 51053 | PAR-CLIP                                         | 27292025 |
| MIRT762536 | hsa-miR-132-3p | MTO1    | 25821 | PAR-CLIP                                         | 27292025 |
| MIRT762537 | hsa-miR-132-3p | OTUD3   | 23252 | PAR-CLIP                                         | 27292025 |
| MIRT762538 | hsa-miR-132-3p | SH3TC2  | 79628 | PAR-CLIP                                         | 27292025 |
| MIRT762539 | hsa-miR-132-3p | SLC10A7 | 84068 | PAR-CLIP                                         | 27292025 |

| Supplementary Table ST3B Validated targets of miR-126 collected from miRTarBase ( <a href="http://mirtarbase.mbc.nctu.edu.tw/">http://mirtarbase.mbc.nctu.edu.tw/</a> ) |                |             |                              |                                                                                                    |                   |
|-------------------------------------------------------------------------------------------------------------------------------------------------------------------------|----------------|-------------|------------------------------|----------------------------------------------------------------------------------------------------|-------------------|
| miRTarBase ID                                                                                                                                                           | miRNA          | Target Gene | Target Gene (Entrez Gene ID) | Experiments                                                                                        | References (PMID) |
| MIRT613368                                                                                                                                                              | hsa-miR-126-3p | ACVR2B      | 93                           | HITS-CLIP                                                                                          | 23824327          |
| MIRT007266                                                                                                                                                              | hsa-miR-126-3p | ADAM9       | 8754                         | Luciferase reporter assay                                                                          | 23437250          |
| MIRT007266                                                                                                                                                              | hsa-miR-126-3p | ADAM9       | 8754                         | Immunohistochemistry//In situ hybridization//Microarray//qRT-PCR//Western blot                     | 22064652          |
| MIRT007266                                                                                                                                                              | hsa-miR-126-3p | ADAM9       | 8754                         | Western blot                                                                                       | 24823697          |
| MIRT007266                                                                                                                                                              | hsa-miR-126-3p | ADAM9       | 8754                         | In situ hybridization//Microarray//Luciferase reporter assay                                       | 25512445          |
| MIRT007266                                                                                                                                                              | hsa-miR-126-3p | ADAM9       | 8754                         | Luciferase reporter assay//Western blot                                                            | 26244545          |
| MIRT007266                                                                                                                                                              | hsa-miR-126-3p | ADAM9       | 8754                         | Luciferase reporter assay//qRT-PCR//Western blot                                                   | 28260063          |
| MIRT438175                                                                                                                                                              | hsa-miR-126-3p | ADGRE5      | 976                          | FACS//Flow//GFP reporter assay//Luciferase reporter assay//qRT-PCR                                 | 24274104          |
| MIRT438600                                                                                                                                                              | hsa-miR-126-3p | ADM         | 133                          | Luciferase reporter assay                                                                          | 24037526          |
| MIRT735543                                                                                                                                                              | hsa-miR-126-3p | AKT1        | 207                          | qRT-PCR//Western blot                                                                              | 26659078          |
| MIRT568554                                                                                                                                                              | hsa-miR-126-3p | AKT2        | 208                          | PAR-CLIP                                                                                           | 20371350          |
| MIRT053253                                                                                                                                                              | hsa-miR-126-3p | BCL2        | 596                          | In situ hybridization//Luciferase reporter assay//Microarray//Northern blot//qRT-PCR//Western blot | 23603512          |
| MIRT732065                                                                                                                                                              | hsa-miR-126-3p | CADM1       | 23705                        | Luciferase reporter assay//qRT-PCR//Western blot                                                   | 26464628          |
| MIRT000965                                                                                                                                                              | hsa-miR-126-3p | CCNE2       | 9134                         | Luciferase reporter assay                                                                          | 18834857          |
| MIRT438412                                                                                                                                                              | hsa-miR-126-3p | Cdkn1b      | 83571                        | Immunoblot//qRT-PCR                                                                                | 25133421          |
| MIRT002993                                                                                                                                                              | hsa-miR-126-3p | CRK         | 1398                         | Luciferase reporter assay//Western blot//qRT-PCR                                                   | 18602365          |
| MIRT002993                                                                                                                                                              | hsa-miR-126-3p | CRK         | 1398                         | Western blot                                                                                       | 19767772          |
| MIRT002993                                                                                                                                                              | hsa-miR-126-3p | CRK         | 1398                         | Immunohistochemistry//Luciferase reporter assay//Western blot                                      | 20619534          |
| MIRT002993                                                                                                                                                              | hsa-miR-126-3p | CRK         | 1398                         | Sequencing                                                                                         | 20371350          |
| MIRT002993                                                                                                                                                              | hsa-miR-126-3p | CRK         | 1398                         | qRT-PCR//Western blot                                                                              | 24969300          |
| MIRT002993                                                                                                                                                              | hsa-miR-126-3p | CRK         | 1398                         | qRT-PCR//Western blot                                                                              | 25027343          |
| MIRT002993                                                                                                                                                              | hsa-miR-126-3p | CRK         | 1398                         | qRT-PCR                                                                                            | 27785060          |
| MIRT021281                                                                                                                                                              | hsa-miR-126-3p | CRKL        | 1399                         | Immunohistochemistry//Luciferase reporter assay//qRT-PCR//Western blot                             | 24055140          |

|            |                |        |       |                                                                                                                      |          |
|------------|----------------|--------|-------|----------------------------------------------------------------------------------------------------------------------|----------|
| MIRT007381 | hsa-miR-126-3p | CXCL12 | 6387  | Luciferase reporter assay                                                                                            | 23396050 |
| MIRT054425 | hsa-miR-126-3p | CXCR4  | 7852  | qRT-PCR//Western blot                                                                                                | 24532280 |
| MIRT054425 | hsa-miR-126-3p | CXCR4  | 7852  | Luciferase reporter assay                                                                                            | 24189753 |
| MIRT054425 | hsa-miR-126-3p | CXCR4  | 7852  | Luciferase reporter assay//Western blot                                                                              | 23744532 |
| MIRT005729 | hsa-miR-126-3p | DNMT1  | 1786  | Flow//Luciferase reporter assay//Microarray//qRT-PCR//Western blot                                                   | 21538319 |
| MIRT005020 | hsa-miR-126-3p | E2F1   | 1869  | qRT-PCR                                                                                                              | 18521848 |
| MIRT006558 | hsa-miR-126-3p | EGFL7  | 51162 | Flow//Immunoblot//Immunohistochemistry//Luciferase reporter assay//qRT-PCR//Western blot//Western blot;qRT-PCR;Other | 20034472 |
| MIRT006558 | hsa-miR-126-3p | EGFL7  | 51162 | Reporter assay                                                                                                       | 21249429 |
| MIRT736681 | hsa-miR-126-3p | EVI5   | 7813  | PAR-CLIP                                                                                                             | 26701625 |
| MIRT733311 | hsa-miR-126-3p | EZH2   | 2146  | Luciferase reporter assay//qRT-PCR//Western blot                                                                     | 27622325 |
| MIRT053249 | hsa-miR-126-3p | FOXO3  | 2309  | In situ hybridization//Luciferase reporter assay//Northern blot//qRT-PCR//Western blot                               | 23603512 |
| MIRT623746 | hsa-miR-126-3p | GRIN2B | 2904  | HITS-CLIP                                                                                                            | 23824327 |
| MIRT001918 | hsa-miR-126-3p | HOXA9  | 3205  | GFP reporter assay//qRT-PCR//Western blot//Luciferase reporter assay                                                 | 18474618 |
| MIRT006543 | hsa-miR-126-3p | IGFBP2 | 3485  | ELISA//Flow//Immunohistochemistry//Luciferase reporter assay//Microarray//qRT-PCR//Western blot                      | 22170610 |
| MIRT004355 | hsa-miR-126-3p | IRS1   | 3667  | qRT-PCR//Luciferase reporter assay//Western blot                                                                     | 18834857 |
| MIRT004355 | hsa-miR-126-3p | IRS1   | 3667  | Luciferase reporter assay                                                                                            | 21464990 |
| MIRT004355 | hsa-miR-126-3p | IRS1   | 3667  | Luciferase reporter assay//Northern blot//qRT-PCR//Western blot                                                      | 23603512 |
| MIRT004355 | hsa-miR-126-3p | IRS1   | 3667  | Luciferase reporter assay//qRT-PCR//Western blot                                                                     | 23893300 |
| MIRT004355 | hsa-miR-126-3p | IRS1   | 3667  | Luciferase reporter assay                                                                                            | 26893711 |
| MIRT004355 | hsa-miR-126-3p | IRS1   | 3667  | Luciferase reporter assay//qRT-PCR//Western blot                                                                     | 26617742 |
| MIRT004355 | hsa-miR-126-3p | IRS1   | 3667  | Microarray//qRT-PCR//Western blot                                                                                    | 27119351 |
| MIRT527649 | hsa-miR-126-3p | KCNJ1  | 3758  | PAR-CLIP                                                                                                             | 22012620 |
| MIRT006450 | hsa-miR-126-3p | KRAS   | 3845  | Immunohistochemistry//Luciferase reporter assay//Microarray//qRT-PCR//Western blot                                   | 22384141 |
| MIRT761730 | hsa-miR-126-3p | L2HGDH | 79944 | PAR-CLIP                                                                                                             | 27292025 |
| MIRT438575 | hsa-miR-126-3p | LRP6   | 4040  | Luciferase reporter assay//qRT-PCR//Western blot                                                                     | 23811937 |
| MIRT438575 | hsa-miR-126-3p | LRP6   | 4040  | Luciferase reporter assay//qRT-PCR//Western blot                                                                     | 26239517 |
| MIRT006545 | hsa-miR-126-3p | MERTK  | 10461 | ELISA//Flow//Immunohistochemistry//Luciferase reporter assay//Microarray//qRT-PCR//Western blot                      | 22170610 |
| MIRT007269 | hsa-miR-126-3p | MMP7   | 4316  | Luciferase reporter assay                                                                                            | 23437250 |
| MIRT438759 | hsa-miR-126-3p | NFKBIA | 4792  | Immunofluorescence//Luciferase reporter assay//qRT-PCR//Western blot                                                 | 23285182 |
| MIRT021282 | hsa-miR-126-3p | PGR    | 5241  | Reporter assay;Western blot                                                                                          | 21526342 |
| MIRT006831 | hsa-miR-126-3p | PIK3CG | 5294  | Immunocytochemistry//Luciferase reporter assay//qRT-PCR//Western blot                                                | 22900072 |
| MIRT006831 | hsa-miR-126-3p | PIK3CG | 5294  | Microarray//qRT-PCR//Western blot//SILAC (Stable Isotope Labeling of Amino acids in Culture)                         | 23142521 |
| MIRT006831 | hsa-miR-126-3p | PIK3CG | 5294  | Luciferase reporter assay                                                                                            | 27729613 |
| MIRT006831 | hsa-miR-126-3p | PIK3CG | 5294  | qRT-PCR//Western blot                                                                                                | 26659078 |
| MIRT736682 | hsa-miR-126-3p | PIK3R1 | 5295  | PAR-CLIP                                                                                                             | 26701625 |
| MIRT003894 | hsa-miR-126-3p | PIK3R2 | 5296  | Luciferase reporter assay//Western blot                                                                              | 18987025 |
| MIRT003894 | hsa-miR-126-3p | PIK3R2 | 5296  | Western blot//qRT-PCR//Luciferase reporter assay                                                                     | 18663744 |
| MIRT003894 | hsa-miR-126-3p | PIK3R2 | 5296  | Luciferase reporter assay//Western blot//Reporter assay;Western blot                                                 | 21249429 |
| MIRT003894 | hsa-miR-126-3p | PIK3R2 | 5296  | qRT-PCR//Western blot                                                                                                | 24969300 |
| MIRT003894 | hsa-miR-126-3p | PIK3R2 | 5296  | Immunohistochemistry//In situ hybridization//qRT-PCR//Western blot                                                   | 26381870 |
| MIRT003894 | hsa-miR-126-3p | PIK3R2 | 5296  | Luciferase reporter assay//qRT-PCR//Western blot                                                                     | 27191494 |



|            |                |         |        |                                                                                                 |          |
|------------|----------------|---------|--------|-------------------------------------------------------------------------------------------------|----------|
| MIRT006544 | hsa-miR-126-3p | PITPNC1 | 26207  | ELISA//Flow//Immunohistochemistry//Luciferase reporter assay//Microarray//qRT-PCR//Western blot | 22170610 |
| MIRT761731 | hsa-miR-126-3p | PLAGL2  | 5326   | PAR-CLIP                                                                                        | 27292025 |
| MIRT000344 | hsa-miR-126-3p | PLK2    | 10769  | Luciferase reporter assay//qRT-PCR                                                              | 18832181 |
| MIRT000344 | hsa-miR-126-3p | PLK2    | 10769  | Luciferase reporter assay//qRT-PCR//Western blot                                                | 24969300 |
| MIRT005727 | hsa-miR-126-3p | PTPN7   | 5778   | Flow//Immunoprecipitation//Luciferase reporter assay//qRT-PCR//Western blot                     | 21163928 |
| MIRT045695 | hsa-miR-126-3p | RBMX    | 27316  | CLASH                                                                                           | 23622248 |
| MIRT000966 | hsa-miR-126-3p | RGS3    | 5998   | Luciferase reporter assay                                                                       | 18834857 |
| MIRT000966 | hsa-miR-126-3p | RGS3    | 5998   | Reporter assay                                                                                  | 21249429 |
| MIRT000966 | hsa-miR-126-3p | RGS3    | 5998   | Immunohistochemistry//Luciferase reporter assay//qRT-PCR//Western blot                          | 27754994 |
| MIRT438574 | hsa-miR-126-3p | RHOU    | 58480  | Luciferase reporter assay//qRT-PCR//Western blot                                                | 23811937 |
| MIRT734471 | hsa-miR-126-3p | ROCK1   | 6093   | Luciferase reporter assay//qRT-PCR//Western blot                                                | 27108693 |
| MIRT438651 | hsa-miR-126-3p | SIRT1   | 23411  | Luciferase reporter assay//qRT-PCR//Western blot                                                | 23877372 |
| MIRT545417 | hsa-miR-126-3p | SLC39A6 | 25800  | PAR-CLIP                                                                                        | 21572407 |
| MIRT614772 | hsa-miR-126-3p | SLC41A2 | 84102  | HITS-CLIP                                                                                       | 23824327 |
| MIRT614772 | hsa-miR-126-3p | SLC41A2 | 84102  | HITS-CLIP                                                                                       | 19536157 |
| MIRT614772 | hsa-miR-126-3p | SLC41A2 | 84102  | HITS-CLIP                                                                                       | 27418678 |
| MIRT000798 | hsa-miR-126-3p | SLC45A3 | 85414  | Western blot//Luciferase reporter assay//Reporter assay;Other                                   | 18193184 |
| MIRT006679 | hsa-miR-126-3p | SLC7A5  | 8140   | Immunohistochemistry//Luciferase reporter assay//qRT-PCR//Western blot                          | 21439283 |
| MIRT006679 | hsa-miR-126-3p | SLC7A5  | 8140   | PAR-CLIP                                                                                        | 20371350 |
| MIRT006679 | hsa-miR-126-3p | SLC7A5  | 8140   | Flow//Immunohistochemistry//Luciferase reporter assay//qRT-PCR//Western blot                    | 26054677 |
| MIRT006679 | hsa-miR-126-3p | SLC7A5  | 8140   | Luciferase reporter assay//Western blot                                                         | 26244545 |
| MIRT005370 | hsa-miR-126-3p | SOX2    | 6657   | Immunohistochemistry//Luciferase reporter assay//Microarray//qRT-PCR//Western blot              | 21304604 |
| MIRT005370 | hsa-miR-126-3p | SOX2    | 6657   | Luciferase reporter assay                                                                       | 24384842 |
| MIRT000343 | hsa-miR-126-3p | SPRED1  | 161742 | Luciferase reporter assay//Western blot                                                         | 18987025 |
| MIRT000343 | hsa-miR-126-3p | SPRED1  | 161742 | Luciferase reporter assay                                                                       | 18694566 |
| MIRT000343 | hsa-miR-126-3p | SPRED1  | 161742 | Luciferase reporter assay                                                                       | 18832181 |
| MIRT000343 | hsa-miR-126-3p | SPRED1  | 161742 | Flow//Luciferase reporter assay//qRT-PCR//Western blot                                          | 22525256 |
| MIRT000343 | hsa-miR-126-3p | SPRED1  | 161742 | qRT-PCR//Western blot                                                                           | 23811937 |
| MIRT000343 | hsa-miR-126-3p | SPRED1  | 161742 | Immunohistochemistry//In situ hybridization//qRT-PCR//Western blot                              | 26381870 |
| MIRT736683 | hsa-miR-126-3p | SZRD1   | 26099  | PAR-CLIP                                                                                        | 26701625 |
| MIRT438192 | hsa-miR-126-3p | TCF4    | 6925   | Luciferase reporter assay                                                                       | 24190507 |
| MIRT006883 | hsa-miR-126-3p | TEK     | 7010   | Luciferase reporter assay//qRT-PCR//Western blot                                                | 22867989 |
| MIRT000967 | hsa-miR-126-3p | TOM1    | 10043  | Luciferase reporter assay                                                                       | 18834857 |
| MIRT000967 | hsa-miR-126-3p | TOM1    | 10043  | Luciferase reporter assay//qRT-PCR//Western blot//Reporter assay;Western blot                   | 20083669 |
| MIRT000967 | hsa-miR-126-3p | TOM1    | 10043  | Microarray//qRT-PCR                                                                             | 22815788 |
| MIRT005538 | hsa-miR-126-3p | TWF1    | 5756   | Luciferase reporter assay//Microarray//Northern blot//qRT-PCR//Western blot                     | 20571053 |
| MIRT005540 | hsa-miR-126-3p | TWF2    | 11344  | Luciferase reporter assay//Microarray//Northern blot//qRT-PCR//Western blot                     | 20571053 |
| MIRT004081 | hsa-miR-126-3p | VCAM1   | 7412   | Luciferase reporter assay//Western blot//Reporter assay;Other                                   | 18227515 |
| MIRT003428 | hsa-miR-126-3p | VEGFA   | 7422   | Luciferase reporter assay//Reporter assay                                                       | 19223090 |
| MIRT003428 | hsa-miR-126-3p | VEGFA   | 7422   | Luciferase reporter assay//qRT-PCR//Western blot                                                | 22510476 |
| MIRT003428 | hsa-miR-126-3p | VEGFA   | 7422   | Luciferase reporter assay//Western blot//Reporter assay;Western blot                            | 21249429 |
| MIRT003428 | hsa-miR-126-3p | VEGFA   | 7422   | Luciferase reporter assay//qRT-PCR//Western blot                                                | 25428912 |

|            |                |       |      |                                                  |          |
|------------|----------------|-------|------|--------------------------------------------------|----------|
| MIRT003428 | hsa-miR-126-3p | VEGFA | 7422 | PAR-CLIP                                         | 21572407 |
| MIRT003428 | hsa-miR-126-3p | VEGFA | 7422 | Luciferase reporter assay                        | 24140635 |
| MIRT003428 | hsa-miR-126-3p | VEGFA | 7422 | Luciferase reporter assay//qRT-PCR//Western blot | 23900443 |

**Supplementary Table ST4A: Significantly enriched biological processes having at least 3 genes in a category (<https://genecodis.genyo.es/>)**

| Description                                                      | Anno tation_id      | Genes_f ound among validate d targets | Inp ut_size | No of genes with the GO term | Total number of genes in the genome (genes_univ erse) | Relative _enrich ment | pval              | pval _adj         | genes                                                                                                                                                                                                                                                                              |
|------------------------------------------------------------------|---------------------|---------------------------------------|-------------|------------------------------|-------------------------------------------------------|-----------------------|-------------------|-------------------|------------------------------------------------------------------------------------------------------------------------------------------------------------------------------------------------------------------------------------------------------------------------------------|
| signal transduction                                              | GO:0 0071 65        | 46                                    | 309         | 1540                         | 61686                                                 | 5.96300 593           | 3.25 E- 22        | 3.94 E- 19        | PITPNC1,CHRNA5,CHL1,CD226,ADGRE5,TOM1,ACVR2B,ARHGAP32,CD164,CNTNAP1,PIP5K1A,FZD6,CXCR4,VEGFA,TEK,BDNF,CXCL12,TN FRSF17,ROCK1,RGS3,RASA1,RAF1,MAPK1,PIK3R2,PIK3R1,PGR,ARR3,STMN1,KRAS,IRS1,IRAK1,IMPA1,IGFBP2,GNB1,GATA3,ADGRF4,ALK, FGF2,CMTM3,AKT2,AKT1,EGFR,HBEGF,LGR4,IRAK4,ADM |
| multicellular organism development                               | GO:0 0072 75        | 37                                    | 309         | 1102                         | 61686                                                 | 6.70267 651           | 1.18 E- 19        | 9.56 E- 17        | CADM1,SIRT1,RAB18,CHL1,MERTK,RACK1,SPRY1,PDLIM7,CD164,FZD6,FXR1,VEGFA,TEK,SPAST,SOX2,TNFRSF17,MEF2A,LRP6,LFNG,STM N1,HOXC4,HOXA9,GRIN2B,ALK,SPRED1,FGF2,AKT2,AKT1,FAT3,EYA4,WNT3A,EPHA4,EGFR,PRDM15,SOX6,LGR4,EGFL7                                                                |
| <b>positive regulation of transcription by RNA polymerase II</b> | <b>GO:0 0459 44</b> | <b>34</b>                             | <b>309</b>  | <b>1064</b>                  | <b>61686</b>                                          | <b>6.37918 826</b>    | <b>1.73 E- 17</b> | <b>1.05 E- 14</b> | <b>SIRT1,CRTC1,ACTR2,NR1D2,MLLT10,ZNF148,VEGFA,TCF4,SOX4,SOX2,RB1,RAF1,PLSCR1,PLAGL2,PIK3R2,PIK3R1,PGR,NFKBIA,MEF2A,S MAD2,LRP6,HOXC4,HOXA9,GATA3,FOXO3,FOXO1,FGF2,AKT1,WNT3A,EGFR,E2F1,PRDM15,RBMX,AGO2</b>                                                                       |
| viral process                                                    | GO:0 0160 32        | 31                                    | 309         | 576                          | 61686                                                 | 10.7440 332           | 1.91 E- 22        | 4.64 E- 19        | CADM1,SIRT1,CRTC1,RAB18,NCKAP1,NUP50,RACK1,CCNA2,PLA2G4C,CXCR4,ELOC,STAU1,CXCL12,RB1,MAPK1,PLSCR1,PIK3R1,NFKBIA,N BN,LDLR,RPSA,TRIM23,KPNA1,IRAK1,HSPA1B,ANXA2,EGFR,E2F1,CD55,MDFIC,CR2                                                                                            |
| cell differentiation                                             | GO:0 0301 54        | 31                                    | 309         | 940                          | 61686                                                 | 6.58357 777           | 2.08 E- 16        | 7.20 E- 14        | CADM1,SIRT1,CHL1,NR1D2,PDLIM7,FXR1,VEGFA,TCF4,SPAST,SOX5,SOX4,SOX2,RB1,RAF1,NAP1L1,MEF2A,SMAD2,ARF6,STMN1,FOXO1, FGF2,AKT1,EYA4,EGFR,ECT2,PARP11,SOX6,LGR4,YY1AP1,EGFL7,FGF22                                                                                                      |
| regulation of transcription by RNA polymerase II                 | GO:0 0063 57        | 29                                    | 309         | 1101                         | 61686                                                 | 5.25822 068           | 5.64 E- 13        | 1.05 E- 10        | ZNF652,CDKN1A,ZNF236,ZNF148,VEGFA,TCF4,ELOC,SOX5,RB1,PLAGL2,PGR,MEF2A,SMAD2,HOXC4,HOXA9,ZNF724,GATA3,CC2D1B,FOX O3,FOXO1,ZNF280B,EZH2,EGFR,E2F1,PRDM15,SOX6,BRWD1,PHF20L1,CRK                                                                                                      |
| regulation of transcription, DNA-templated                       | GO:0 0063 55        | 25                                    | 309         | 999                          | 61686                                                 | 4.99577 247           | 7.00 E- 11        | 7.38 E- 09        | NR1D2,ACVR2B,TAF15,ZNF711,SOX4,SOX2,RB1,PGR,MEF2A,SMAD2,LRP6,HOXC4,HOXA9,ZNF724,GATA3,ARID2,FOXO3,FOXO1,ZNF280 B,EZH2,E2F1,SOX6,YY1AP1,PHF20L1,AGO2                                                                                                                                |
| positive regulation of transcription, DNA-templated              | GO:0 0458 93        | 24                                    | 309         | 698                          | 61686                                                 | 6.86410 549           | 2.40 E- 13        | 4.84 E- 11        | NR1D2,CCNA2,TAF15,ZNF711,TCF4,SOX4,SOX2,MAPK1,NFKBIA,MEF2A,SMAD2,LRP6,GTF2H1,GATA3,FOXO3,FOXO1,FGF2,AKT1,WNT3A ,EGFR,E2F1,LGR4,MDFIC,RBMX                                                                                                                                          |
| nervous system development                                       | GO:0 0073 99        | 22                                    | 309         | 507                          | 61686                                                 | 8.66249 21            | 2.41 E- 14        | 6.48 E- 12        | CHL1,MERTK,VEGFA,TCF4,SPAST,SMN1,BDNF,NAP1L1,MEF2A,MAP1B,ARF6,STMN1,APBA1,GATA3,ALK,FGF2,AKT1,FABP7,EPHA4,ECT2, CHAC1,RTN4                                                                                                                                                         |
| positive regulation of cell population proliferation             | GO:0 0082 84        | 22                                    | 309         | 519                          | 61686                                                 | 8.46220 327           | 3.86 E- 14        | 9.35 E- 12        | SIRT1,VEGFA,THBS1,SOX4,CXCL12,BCL2,MAPK1,NAP1L1,LIFR,KRAS,IRS1,FGF2,AKT2,AKT1,EZH2,WNT3A,EGFR,HBEGF,PRAMEF1,CRKL,AD M,FGF22                                                                                                                                                        |
| <b>apoptotic process</b>                                         | <b>GO:0 0069 15</b> | <b>22</b>                             | <b>309</b>  | <b>674</b>                   | <b>61686</b>                                          | <b>6.51614 762</b>    | <b>6.72 E- 12</b> | <b>8.57 E- 10</b> | <b>CADM1,SIRT1,NCKAP1,RACK1,CASP7,FXR1,CXCR4,BNIP2,BCL2,ROCK1,RAF1,MAPK1,PLSCR1,NFKBIA,MEF2A,FOXO3,FOXO1,AKT2,AKT 1,E2F1,CHAC1,RTN4</b>                                                                                                                                            |
| positive regulation of gene expression                           | GO:0 0106 28        | 21                                    | 309         | 485                          | 61686                                                 | 8.64381 944           | 9.88 E- 14        | 2.18 E- 11        | CDH3,PIK3R3,VEGFA,ROCK1,MAPK1,PLSCR1,OCLN,MEF2A,SMAD2,KRAS,HSPA1B,GATA3,FGF2,AKT1,WNT3A,E2F1,DNMT1,TNRC6C,SLC3 8A2,AGO2,FGF22                                                                                                                                                      |
| phosphorylation                                                  | GO:0 0163 10        | 21                                    | 309         | 677                          | 61686                                                 | 6.19239 65            | 5.22 E- 11        | 5.75 E- 09        | CDKN1A,PLK2,MERTK,ACVR2B,PIK3R3,PIP5K1A,TEK,ROCK1,RAF1,MAPK1,PIK3CG,MAP3K3,IRAK1,GK,ALK,AKT2,AKT1,EPHA4,EGFR,ETNK 2,IRAK4                                                                                                                                                          |
| <b>cytokine-mediated signaling pathway</b>                       | <b>GO:0 0192 21</b> | <b>20</b>                             | <b>309</b>  | <b>283</b>                   | <b>61686</b>                                          | <b>14.1082 027</b>    | <b>3.66 E- 17</b> | <b>1.78 E- 14</b> | <b>CDKN1A,VEGFA,VCAM1,SOX2,BCL2,PTGS2,PIK3R1,MMP9,LIFR,KRAS,IRAK1,GATA3,FOXO3,FOXO1,FGF2,AKT1,RHOU,IRAK4,CRKL,CRK</b>                                                                                                                                                              |
| negative regulation of gene expression                           | GO:0 0106           | 20                                    | 309         | 289                          | 61686                                                 | 13.8152 988           | 5.50 E-           | 2.22 E-           | SIRT1,CDKN1A,RACK1,CCNB1,SLC7A5,ZNF148,VEGFA,RB1,PGR,OCLN,SMAD2,GATA3,FGF2,AKT1,EZH2,PARP10,DNMT1,TNRC6C,CRKL,AG O2                                                                                                                                                                |

|                                                           |                   |           |            |            |              |                   |                 |                 |                                                                                                                      |
|-----------------------------------------------------------|-------------------|-----------|------------|------------|--------------|-------------------|-----------------|-----------------|----------------------------------------------------------------------------------------------------------------------|
|                                                           | 29                |           |            |            |              |                   | 17              | 14              |                                                                                                                      |
| negative regulation of apoptotic process                  | GO:0043066        | 20        | 309        | 511        | 61686        | 7.81334904        | 2.44E-12        | 3.70E-10        | SIRT1,CDKN1A,PLK2,VEGFA,THBS1,TEK,BNIP2,BCL2,RASA1,RAF1,PIK3R1,NFKBIA,MMP9,IRAK1,HSPA1B,FOXO1,AKT2,AKT1,EGFR,PRAMEF1 |
| cell adhesion                                             | GO:0007155        | 20        | 309        | 579        | 61686        | 6.8957191         | 2.29E-11        | 2.78E-09        | CADM1,CHL1,CD226,CDH3,ADGRE5,CD164,ADAM9,CNTNAP1,VCAM1,THBS1,CXCL12,ARF6,RPSA,APBA1,FAT3,EPHA4,TLN2,VMP1,FAT4,EGFL7  |
| protein phosphorylation                                   | GO:0006468        | 19        | 309        | 588        | 61686        | 6.45066376        | 2.24E-10        | 2.17E-08        | PLK2,MERTK,ACVR2B,CCNB1,TEK,ROCK1,RAF1,MAPK1,PIK3R1,PIK3CG,MAP3K3,SMAD2,IRAK1,ALK,AKT2,AKT1,EPHA4,EGFR,IRAK4         |
| <b>cell cycle</b>                                         | <b>GO:0007049</b> | <b>18</b> | <b>309</b> | <b>626</b> | <b>61686</b> | <b>5.74019045</b> | <b>4.16E-09</b> | <b>3.25E-07</b> | <b>TUSC2,CDKN1A,RACK1,STAG1,CCNB1,CCNA2,CCNE2,USP8,EVI5,SPAST,RB1,MAPK1,NBN,LIG4,ARF6,ECT2,E2F1,GMNN</b>             |
| intracellular signal transduction                         | GO:0035556        | 17        | 309        | 426        | 61686        | 7.96649802        | 8.22E-11        | 8.30E-09        | PLA2G4C,S100A1,ROCK1,RASA1,RAF1,MAPK1,MAP3K3,SMAD2,STMN1,IRAK1,AKT2,AKT1,DEPDC7,EGFR,ECT2,IRAK4,CRKL                 |
| protein transport                                         | GO:0015031        | 17        | 309        | 613        | 61686        | 5.53626126        | 1.91E-08        | 1.29E-06        | RAB18,NUP50,YKT6,EXOC5,TOM1,RAB5B,PIK3R2,PIK3R1,ARF6,KPNA1,APBA1,LCA5,HOOK3,ECT2,PARP11,SNX7,SEC61A1                 |
| positive regulation of protein phosphorylation            | GO:0001934        | 16        | 309        | 202        | 61686        | 15.8123618        | 9.20E-15        | 2.79E-12        | SIRT1,RACK1,PIK3R3,FXR1,VEGFA,TEK,RAF1,MMP9,KRAS,FGF2,AKT2,AKT1,WNT3A,EGFR,CRKL,FGF22                                |
| MAPK cascade                                              | GO:0000165        | 16        | 309        | 276        | 61686        | 11.5728155        | 1.15E-12        | 1.86E-10        | TEK,RASA1,RAF1,PSMD12,PSMA2,MAPK1,MAP3K3,MEF2A,KRAS,IRS1,GRIN2B,SPRED1,FGF2,EGFR,HBEGF,FGF22                         |
| negative regulation of transcription, DNA-templated       | GO:0045892        | 16        | 309        | 549        | 61686        | 5.81802748        | 2.54E-08        | 1.67E-06        | SIRT1,NR1D2,KDM5C,ZNF148,RB1,SMAD2,GATA3,FOXO1,EZH2,PARP10,E2F1,PRAMEF1,SOX6,LGR4,GMNN,MDFIC                         |
| negative regulation of transcription by RNA polymerase II | GO:0000122        | 15        | 309        | 766        | 61686        | 3.90922457        | 9.47E-06        | 0.0001978       | SIRT1,NR1D2,ACVR2B,ZNF148,VEGFA,SOX2,RB1,MEF2A,SMAD2,GATA3,CC2D1B,FOXO3,EZH2,E2F1,DNMT1                              |
| positive regulation of protein kinase B signaling         | GO:0051897        | 14        | 309        | 181        | 61686        | 15.4410771        | 6.11E-13        | 1.06E-10        | VEGFA,THBS1,TEK,PIK3R2,PIK3R1,PIK3CG,IRS1,GATA3,FGF2,OSBPL8,EGFR,HBEGF,RTN4,FGF22                                    |
| positive regulation of cell migration                     | GO:0030335        | 14        | 309        | 250        | 61686        | 11.1793398        | 4.78E-11        | 5.51E-09        | RACK1,ADAM9,PIK3R3,CXCR4,VEGFA,THBS1,CXCL12,MAPK1,PIK3R1,MMP9,MMP7,AKT2,EGFR,HBEGF                                   |
| cellular response to DNA damage stimulus                  | GO:0006974        | 14        | 309        | 496        | 61686        | 5.63474789        | 2.81E-07        | 1.22E-05        | SIRT1,SMCHD1,CDKN1A,BCL2,MAPK1,NBN,LIG4,GTF2H1,FOXO1,AKT1,EYA4,PARP10,UBE2W,POLK                                     |
| transmembrane transport                                   | GO:0055085        | 14        | 309        | 558        | 61686        | 5.00866479        | 1.13E-06        | 3.39E-05        | SLC39A6,CFTR,ATP6V0E1,SLC7A5,VDAC2,SLC2A1,BCL2,PSMD12,PSMA2,GJE1,SFXN2,SLC45A3,SLC10A7,EIF2S3                        |
| G protein-coupled receptor signaling pathway              | GO:0007186        | 14        | 309        | 672        | 61686        | 4.15898058        | 9.46E-06        | 0.0001993       | ADGRE5,FZD6,CXCR4,CXCL12,ROCK1,RGS3,PIK3R1,PIK3CG,GNB1,ADGRF4,AKT1,ECT2,LGR4,ADM                                     |
| chromatin organization                                    | GO:0006325        | 13        | 309        | 322        | 61686        | 8.05963939        | 1.23E-08        | 8.75E-07        | ASF1A,SIRT1,SMCHD1,KDM5C,SOX2,RB1,ARID2,EZH2,EYA4,DNMT1,SETD5,ALKBH4,BRWD1                                           |
| negative regulation of cell population                    | GO:00082          | 13        | 309        | 438        | 61686        | 5.92512302        | 4.27E-          | 1.64E-          | CDKN1A,SPRY1,CD164,SOX4,BCL2,RB1,RAF1,SMAD2,HSPA1B,GATA3,ARID2,FABP7,ADM                                             |

|                                          |                   |           |            |            |              |                   |                 |                 |                                                                                     |
|------------------------------------------|-------------------|-----------|------------|------------|--------------|-------------------|-----------------|-----------------|-------------------------------------------------------------------------------------|
| proliferation                            | 85                |           |            |            |              |                   | 07              | 05              |                                                                                     |
| neutrophil degranulation                 | GO:0043312        | 13        | 309        | 476        | 61686        | 5.452109          | 1.08E-06        | 3.31E-05        | RAB18,ADGRE5,ACTR2,TOM1,ROCK1,RAB5B,PSMD12,PSMA2,MAPK1,MMP9,HSPA1B,ANXA2,CD55       |
| <b>cellular response to hypoxia</b>      | <b>GO:0071456</b> | <b>12</b> | <b>309</b> | <b>128</b> | <b>61686</b> | <b>18.7154126</b> | <b>2.85E-12</b> | <b>4.06E-10</b> | <b>SIRT1,CCNB1,CCNA2,VEGFA,BCL2,PTGS2,IRAK1,GNB1,AKT1,E2F1,RTN4,B3GAT1</b>          |
| immune system process                    | GO:0002376        | 12        | 309        | 541        | 61686        | 4.42804587        | 2.23E-05        | 0.0003923       | CADM1,TNFRSF17,PIK3CG,OAS2,TRIM23,IRAK1,GATA3,C6orf106,CD55,LGR4,IRAK4,CR2          |
| ion transport                            | GO:0006811        | 12        | 309        | 587        | 61686        | 4.08104398        | 4.90E-05        | 0.0007071       | SLC39A6,CHRNA5,CFTR,ATP6V0E1,VDAC2,KCNJ9,KCNJ1,GRIN2B,SFXN2,SLC41A2,SLC10A7,SLC38A2 |
| cell-cell adhesion                       | GO:0098609        | 11        | 309        | 164        | 61686        | 13.3898887        | 8.68E-10        | 7.79E-08        | CDH3,VCAM1,BCL2,LRP6,ANXA2,FAT3,TLN2,EGFR,TMEM47,VMP1,FAT4                          |
| heart development                        | GO:0007507        | 11        | 309        | 234        | 61686        | 9.38436644        | 3.53E-08        | 2.14E-06        | CDKN1A,PDLIM7,CASP7,TEK,SOX4,RAF1,MAPK1,MEF2A,SMAD2,CRKL,ADM                        |
| <b>Ras protein signal transduction</b>   | <b>GO:0007265</b> | <b>10</b> | <b>309</b> | <b>72</b>  | <b>61686</b> | <b>27.7265372</b> | <b>3.50E-12</b> | <b>4.72E-10</b> | <b>CDKN1A,PLK2,CCNA2,USP8,RB1,KRAS,GNB1,FGF2,DNMT1,CRKL</b>                         |
| in utero embryonic development           | GO:0001701        | 10        | 309        | 202        | 61686        | 9.88272614        | 9.16E-08        | 4.73E-06        | CCNB1,VEGFA,NBN,SMAD2,LIG4,APBA1,GATA3,WNT3A,FKBP10,ETNK2                           |
| axon guidance                            | GO:0007411        | 10        | 309        | 224        | 61686        | 8.91210125        | 2.39E-07        | 1.12E-05        | CHL1,PDLIM7,CXCR4,BDNF,CXCL12,MAPK1,PIK3R1,GATA3,WNT3A,EPHA4                        |
| protein deubiquitination                 | GO:0016579        | 10        | 309        | 236        | 61686        | 8.45894356        | 3.87E-07        | 1.54E-05        | OTUD3,CFTR,CCNA2,USP8,PSMD12,PSMA2,NFKBIA,SMAD2,GATA3,RNF128                        |
| extracellular matrix organization        | GO:0030198        | 10        | 309        | 245        | 61686        | 8.14820686        | 5.44E-07        | 1.94E-05        | VCAM1,THBS1,MMP13,MMP9,MMP7,LOXL1,OLFML2A,FGF2,ADAMTSL1,WNT3A                       |
| response to drug                         | GO:0042493        | 10        | 309        | 278        | 61686        | 7.18097367        | 1.70E-06        | 4.92E-05        | CDKN1A,CDH3,CCNB1,THBS1,BCL2,PFAS,MAP1B,IGFBP2,GATA3,CYP2E1                         |
| positive regulation of GTPase activity   | GO:0043547        | 10        | 309        | 303        | 61686        | 6.58848409        | 3.66E-06        | 9.24E-05        | RACK1,ARHGAP32,EVI5,BNIP2,RGS3,RASA1,EZH2,ECT2,DOCK10,HACD3                         |
| regulation of gene expression            | GO:0010468        | 10        | 309        | 313        | 61686        | 6.37798939        | 4.87E-06        | 0.0001146       | ZNF711,SOX2,BCL2,MAPK1,NFKBIA,APBA1,HOXA9,UBXN2A,EZH2,CRKL                          |
| positive regulation of apoptotic process | GO:0043065        | 10        | 309        | 370        | 61686        | 5.39543427        | 2.07E-05        | 0.0003687       | SIRT1,RACK1,SOX4,MMP9,FOXO3,FOXO1,AKT1,ECT2,E2F1,ADM                                |
| cell division                            | GO:00051301       | 10        | 309        | 385        | 61686        | 5.18522254        | 2.90E-05        | 0.0004559       | STAG1,CCNB1,CCNA2,CCNE2,EVI5,SPAST,RB1,LIG4,ARF6,ECT2                               |
| protein ubiquitination                   | GO:00165          | 10        | 309        | 503        | 61686        | 3.96880851        | 0.00025         | 0.00254         | SIRT1,RACK1,ELOC,TRIM23,AKT1,DCAF17,RNF128,GID4,TRIM36,UBE2W                        |

|                                                        |                   |          |            |            |              |                   |                 |                 |                                                             |
|--------------------------------------------------------|-------------------|----------|------------|------------|--------------|-------------------|-----------------|-----------------|-------------------------------------------------------------|
|                                                        | 67                |          |            |            |              |                   | 79              | 13              |                                                             |
| innate immune response                                 | GO:0045087        | 10       | 309        | 505        | 61686        | 3.95309045        | 0.0002661       | 0.0025802       | PIK3CG,OAS2,TRIM23,IRAK1,GATA3,C6orf106,CD55,LGR4,IRAK4,CR2 |
| lipid metabolic process                                | GO:0006629        | 10       | 309        | 578        | 61686        | 3.45382471        | 0.0007561       | 0.0055368       | PLA2G4C,PTGS2,PLAGL2,LDLR,ACSL4,CYP2E1,ETNK2,HACD3,CRKL,CRK |
| platelet activation                                    | GO:0030168        | 9        | 309        | 107        | 61686        | 16.7913982        | 4.12E-09        | 3.33E-07        | MERTK,FZD6,RAF1,MAPK1,PLSCR1,PIK3R1,PIK3CG,GNB1,WNT3A       |
| positive regulation of canonical Wnt signaling pathway | GO:0090263        | 9        | 309        | 144        | 61686        | 12.4769417        | 5.56E-08        | 3.21E-06        | CDH3,USP8,SOX4,PSMD12,PSMA2,WNT3A,EGFR,PRDM15,LGR4          |
| regulation of cell cycle                               | GO:0051726        | 9        | 309        | 149        | 61686        | 12.0582524        | 7.46E-08        | 4.21E-06        | CDKN1A,RACK1,CCNB1,CCNE2,BCL2,RB1,E2F1,TRIM36,YY1AP1        |
| <b>response to hypoxia</b>                             | <b>GO:0001666</b> | <b>9</b> | <b>309</b> | <b>170</b> | <b>61686</b> | <b>10.5687036</b> | <b>2.30E-07</b> | <b>1.09E-05</b> | <b>CXCR4,VEGFA,VCAM1,THBS1,TEK,SLC2A1,CXCL12,RAF1,ADM</b>   |
| cell migration                                         | GO:0016477        | 9        | 309        | 248        | 61686        | 7.24467585        | 5.25E-06        | 0.0001223       | NCKAP1,MERTK,ADAM9,PIP5K1A,CXCR4,THBS1,PIK3CG,HBEGF,RHOU    |
| DNA repair                                             | GO:0006281        | 9        | 309        | 380        | 61686        | 4.72810424        | 0.0001451       | 0.0017152       | ASF1A,SMCHD1,NBN,LIG4,GTF2H1,EYA4,PARP10,UBE2W,POLK         |
| inflammatory response                                  | GO:0006954        | 9        | 309        | 402        | 61686        | 4.46935227        | 0.00022         | 0.0023088       | TUSC2,ADGRE5,PLA2G4C,CXCR4,THBS1,PTGS2,PIK3CG,AKT1,ADM      |
| spermatogenesis                                        | GO:0007283        | 9        | 309        | 413        | 61686        | 4.35031383        | 0.0002681       | 0.0025896       | CADM1,SIRT1,MERTK,CCNB1,HOXA9,E2F1,PARP11,LGR4,CRKL         |
| proteolysis                                            | GO:0006508        | 9        | 309        | 509        | 61686        | 3.52982242        | 0.0011823       | 0.0076223       | OTUD3,USP8,CASP7,ADAM9,MMP13,MMP9,MMP7,ADAMTSL1,PRSS22      |
| positive regulation of endothelial cell migration      | GO:0010595        | 8        | 309        | 66         | 61686        | 24.1977052        | 1.62E-09        | 1.40E-07        | VEGFA,THBS1,TEK,PIK3CG,GATA3,FUT1,FGF2,AKT1                 |
| insulin receptor signaling pathway                     | GO:0008286        | 8        | 309        | 79         | 61686        | 20.2158044        | 6.94E-09        | 5.26E-07        | ATP6V0E1,PIK3R3,PIK3R2,PIK3R1,IRS1,FOXO1,AKT2,AKT1          |
| cellular response to tumor necrosis factor             | GO:00071356       | 8        | 309        | 139        | 61686        | 11.4895579        | 5.77E-07        | 2.00E-05        | SIRT1,VCAM1,THBS1,MAPK1,NFKBIA,OCLN,GATA3,AKT1              |
| <b>positive regulation of angiogenesis</b>             | <b>GO:0045766</b> | <b>8</b> | <b>309</b> | <b>151</b> | <b>61686</b> | <b>10.5764804</b> | <b>1.08E-06</b> | <b>3.28E-05</b> | <b>SIRT1,VEGFA,THBS1,TEK,FGF2,RTN4,ADM,AGO2</b>             |
| aging                                                  | GO:0007568        | 8        | 309        | 167        | 61686        | 9.56316493        | 2.30E-06        | 6.27E-05        | CASP7,VCAM1,MAPK1,MMP7,IRAK1,IGFBP2,AKT1,ADM                |
| cell surface receptor signaling pathway                | GO:00071          | 8        | 309        | 251        | 61686        | 6.3627432         | 4.42E-          | 0.00066         | TSPAN12,MERTK,ADGRE5,FZD6,MAPK1,LIFR,ADGRF4,EGFR            |

|                                                        |                   |          |            |            |              |                   |                 |                  |                                                        |
|--------------------------------------------------------|-------------------|----------|------------|------------|--------------|-------------------|-----------------|------------------|--------------------------------------------------------|
|                                                        | 66                |          |            |            |              |                   | 05              | 94               |                                                        |
| <b>angiogenesis</b>                                    | <b>GO:0001525</b> | <b>8</b> | <b>309</b> | <b>252</b> | <b>61686</b> | <b>6.33749422</b> | <b>4.54E-05</b> | <b>0.0006798</b> | <b>TSPAN12,SIRT1,VEGFA,TEK,PIK3CG,ANXA2,FGF2,EGFL7</b> |
| intracellular protein transport                        | GO:0006886        | 8        | 309        | 286        | 61686        | 5.58408582        | 0.0001095       | 0.0013616        | TBC1D9,RAB18,TOM1,EVI5,RAB5B,ARF6,TRIM23,APBA1         |
| positive regulation of glucose import                  | GO:0046326        | 7        | 309        | 38         | 61686        | 36.7741441        | 8.17E-10        | 7.62E-08         | PIK3R1,OCLN,MEF2A,IRS1,AKT2,AKT1,OSBPL8                |
| activation of MAPKK activity                           | GO:0000186        | 7        | 309        | 46         | 61686        | 30.3786408        | 3.35E-09        | 2.80E-07         | ADAM9,RAF1,MAPK1,MAP3K3,EGFR,CRKL,CRK                  |
| mitotic cytokinesis                                    | GO:0000281        | 7        | 309        | 51         | 61686        | 27.4003427        | 7.09E-09        | 5.21E-07         | USP8,SPAST,ROCK1,RASA1,STMN1,ECT2,TRIM36               |
| positive regulation of MAP kinase activity             | GO:0043406        | 7        | 309        | 57         | 61686        | 24.5160961        | 1.58E-08        | 1.09E-06         | VEGFA,PIK3CG,KRAS,IRAK1,FGF2,EZH2,EGFR                 |
| cellular response to growth factor stimulus            | GO:0071363        | 7        | 309        | 63         | 61686        | 22.1812298        | 3.22E-08        | 2.00E-06         | TWF2,RACK1,ACVR2B,THBS1,MAP1B,AKT1,EGFR                |
| positive regulation of endothelial cell proliferation  | GO:0001938        | 7        | 309        | 71         | 61686        | 19.6819363        | 7.47E-08        | 4.12E-06         | SIRT1,VEGFA,TEK,CXCL12,FGF2,AKT1,EGFL7                 |
| <b>response to insulin</b>                             | <b>GO:0032868</b> | <b>7</b> | <b>309</b> | <b>73</b>  | <b>61686</b> | <b>19.1427051</b> | <b>9.08E-08</b> | <b>4.78E-06</b>  | <b>SIRT1,SLC2A1,IRS1,IGFBP2,GCNT1,FOXO1,ADM</b>        |
| phosphatidylinositol biosynthetic process              | GO:0006661        | 7        | 309        | 77         | 61686        | 18.1482789        | 1.32E-07        | 6.52E-06         | PIK3R3,PIP5K1A,PIK3R2,PIK3R1,PIK3CG,IMPA1,FGF2         |
| cell chemotaxis                                        | GO:0060326        | 7        | 309        | 80         | 61686        | 17.4677184        | 1.72E-07        | 8.33E-06         | PIP5K1A,CXCR4,VCAM1,CXCL12,HBEGF,CRKL,CRK              |
| ephrin receptor signaling pathway                      | GO:0048013        | 7        | 309        | 84         | 61686        | 16.6359223        | 2.41E-07        | 1.10E-05         | ACTR2,ROCK1,RASA1,MMP9,GRIN2B,EPHA4,CRK                |
| regulation of protein stability                        | GO:0031647        | 7        | 309        | 86         | 61686        | 16.2490404        | 2.83E-07        | 1.20E-05         | USP8,SOX4,BCL2,MAPK1,KRAS,RNF128,GNL3L                 |
| positive regulation of peptidyl-serine phosphorylation | GO:0033138        | 7        | 309        | 88         | 61686        | 15.879744         | 3.32E-07        | 1.34E-05         | VEGFA,BDNF,BCL2,RAF1,AKT1,WNT3A,EGFR                   |
| viral entry into host cell                             | GO:0046718        | 7        | 309        | 91         | 61686        | 15.356236         | 4.18E-07        | 1.63E-05         | PLSCR1,LDLR,RPSA,HSPA1B,EGFR,CD55,CR2                  |
| activation of GTPase activity                          | GO:0090630        | 7        | 309        | 95         | 61686        | 14.7096576        | 5.60E-07        | 1.97E-05         | TBC1D9,PIP5K1A,EVI5,AKT2,ECT2,CRKL,CRK                 |
| regulation of cell migration                           | GO:00303          | 7        | 309        | 101        | 61686        | 13.8358166        | 8.50E-          | 2.79E-           | ROCK1,FGF2,AKT2,AKT1,RTN4,DOCK10,FGF22                 |

|                                     |            |   |     |     |       |            |           |            |                                             |
|-------------------------------------|------------|---|-----|-----|-------|------------|-----------|------------|---------------------------------------------|
|                                     | 34         |   |     |     |       |            | 07        | 05         |                                             |
| wound healing                       | GO:0042060 | 7 | 309 | 101 | 61686 | 13.8358166 | 8.50E-07  | 2.79E-05   | CDKN1A,CDH3,RAF1,SMAD2,FGF2,EGFR,FKBP10     |
| negative regulation of cell growth  | GO:0030308 | 7 | 309 | 126 | 61686 | 11.0906149 | 3.75E-06  | 9.37E-05   | SIRT1,CDKN1A,RACK1,BCL2,RB1,HSPA1B,RTN4     |
| activation of MAPK activity         | GO:0000187 | 7 | 309 | 129 | 61686 | 10.8326936 | 4.38E-06  | 0.0001052  | CXCR4,THBS1,MAPK1,IRAK1,ALK,FGF2,CRKL       |
| leukocyte migration                 | GO:0050900 | 7 | 309 | 141 | 61686 | 9.91076224 | 7.88E-06  | 0.0001768  | MERTK,SLC7A5,TEK,ROCK1,PIK3R2,PIK3R1,MMP9   |
| cell population proliferation       | GO:0008283 | 7 | 309 | 144 | 61686 | 9.70428803 | 9.04E-06  | 0.0001922  | BCL2,NBN,LIG4,GNB1,AKT1,WNT3A,YY1AP1        |
| rhythmic process                    | GO:0048511 | 7 | 309 | 148 | 61686 | 9.44200997 | 1.08E-05  | 0.0002202  | SIRT1,CRTC1,RACK1,NR1D2,KDM5C,EZH2,LGR4     |
| regulation of translation           | GO:0006417 | 7 | 309 | 152 | 61686 | 9.19353602 | 1.29E-05  | 0.0002493  | RACK1,FXR1,FOXO3,AKT2,AKT1,TNRC6C,AGO2      |
| animal organ morphogenesis          | GO:0009887 | 7 | 309 | 163 | 61686 | 8.57311335 | 2.02E-05  | 0.0003627  | BCL2,MAPK1,LFNG,FGF2,GMNN,CRKL,FGF22        |
| T cell receptor signaling pathway   | GO:0050852 | 7 | 309 | 165 | 61686 | 8.46919682 | 2.19E-05  | 0.0003866  | PSMD12,PSMA2,MAPK1,PIK3R2,PIK3R1,GATA3,CRKL |
| protein autophosphorylation         | GO:0046777 | 7 | 309 | 172 | 61686 | 8.12452021 | 2.85E-05  | 0.0004548  | TEK,MAP3K3,IRAK1,ALK,AKT1,EPHA4,EGFR        |
| response to lipopolysaccharide      | GO:0032496 | 7 | 309 | 172 | 61686 | 8.12452021 | 2.85E-05  | 0.0004548  | VCAM1,TFPI,MAPK1,NFKBIA,LOXL1,IRAK1,ADM     |
| protein stabilization               | GO:0050821 | 7 | 309 | 194 | 61686 | 7.20318286 | 6.12E-05  | 0.0008475  | OTUD3,CDKN1A,SOX4,PIK3R1,HSPA1B,EPHA4,RTN4  |
| endocytosis                         | GO:0006897 | 7 | 309 | 228 | 61686 | 6.12902402 | 0.0001668 | 0.0018715  | TOM1,RAB5B,PIK3CG,ARR3,LRP6,LDLR,RHOU       |
| translation                         | GO:0006412 | 7 | 309 | 233 | 61686 | 5.9974999  | 0.0001904 | 0.000207   | RPS5,RPL7,RPSA,AKT1,EIF2S3,EGFR,AGO2        |
| regulation of apoptotic process     | GO:0042981 | 7 | 309 | 240 | 61686 | 5.82257282 | 0.0002208 | 0.00023623 | SIRT1,BCL2,RAF1,KPNA1,ALK,AKT1,RTN4         |
| protein phosphotransferase activity | GO:0018215 | 7 | 309 | 287 | 61686 | 4.86905044 | 0.0006634 | 0.00050411 | OTUD3,YKT6,USP8,LOXL1,GCNT1,EOGT,ZDHHC2     |
| immune response                     | GO:00069   | 7 | 309 | 377 | 61686 | 3.70667765 | 0.000312  | 0.000613   | ADGRE5,CD164,CXCR4,THBS1,CXCL12,KIR3DL1,CR2 |



|                                                               |            |   |     |    |       |            |          |          |                                           |
|---------------------------------------------------------------|------------|---|-----|----|-------|------------|----------|----------|-------------------------------------------|
|                                                               | 55         |   |     |    |       |            | 14       | 27       |                                           |
| phosphatidylinositol 3-kinase signaling                       | GO:0014065 | 6 | 309 | 37 | 61686 | 32.3726056 | 3.07E-08 | 1.96E-06 | PIK3R2,PIK3R1,PIK3CG,IRS1,GATA3,AKT1      |
| phosphatidylinositol phosphorylation                          | GO:0046854 | 6 | 309 | 52 | 61686 | 23.034354  | 2.52E-07 | 1.13E-05 | PIK3R3,PIP5K1A,PIK3R2,PIK3R1,PIK3CG,IMPA1 |
| somatic stem cell population maintenance                      | GO:0035019 | 6 | 309 | 58 | 61686 | 20.6514898 | 4.89E-07 | 1.82E-05 | SOX4,SOX2,RAF1,SMAD2,LIG4,FGF2            |
| positive regulation of smooth muscle cell proliferation       | GO:0048661 | 6 | 309 | 59 | 61686 | 20.3014645 | 5.42E-07 | 1.96E-05 | THBS1,IRAK1,AKT1,EGFR,HBEGF,IRAK4         |
| response to mechanical stimulus                               | GO:0009612 | 6 | 309 | 61 | 61686 | 19.6358428 | 6.63E-07 | 2.26E-05 | CCNB1,GDF5,THBS1,CXCL12,MAP1B,IGFBP2      |
| response to glucocorticoid                                    | GO:0051384 | 6 | 309 | 64 | 61686 | 18.7154126 | 8.84E-07 | 2.82E-05 | CDKN1A,ADAM9,BCL2,KRAS,IGFBP2,ADM         |
| post-embryonic development                                    | GO:0009791 | 6 | 309 | 64 | 61686 | 18.7154126 | 8.84E-07 | 2.82E-05 | BCL2,PLAGL2,SMAD2,GATA3,ETNK2,AGO2        |
| vascular endothelial growth factor receptor signaling pathway | GO:0048010 | 6 | 309 | 65 | 61686 | 18.4274832 | 9.70E-07 | 3.05E-05 | NCKAP1,VEGFA,ROCK1,PIK3R2,PIK3R1,CRK      |
| cell fate commitment                                          | GO:0045165 | 6 | 309 | 67 | 61686 | 17.8774091 | 1.16E-06 | 3.43E-05 | SOX5,SOX2,SMAD2,GATA3,WNT3A,SOX6          |
| cerebral cortex development                                   | GO:0021987 | 6 | 309 | 72 | 61686 | 16.6359223 | 1.78E-06 | 5.02E-05 | SLC2A1,LRP6,FAT4,SLC38A2,CRKL,CRK         |
| positive regulation of kinase activity                        | GO:0033674 | 6 | 309 | 72 | 61686 | 16.6359223 | 1.78E-06 | 5.02E-05 | MERTK,TEK,NBN,ALK,EPHA4,EGFR              |
| protein import into nucleus                                   | GO:0006606 | 6 | 309 | 75 | 61686 | 15.9704854 | 2.27E-06 | 6.24E-05 | CDKN1A,NUP50,PIK3R1,NFKBIA,KPNA1,AKT1     |
| fibroblast growth factor receptor signaling pathway           | GO:0008543 | 6 | 309 | 78 | 61686 | 15.356236  | 2.86E-06 | 7.52E-05 | MAPK1,SPRED1,FGF2,FAT4,CRKL,FGF22         |
| cell morphogenesis                                            | GO:0000902 | 6 | 309 | 78 | 61686 | 15.356236  | 2.86E-06 | 7.52E-05 | NCKAP1,FRY,BCL2,GJE1,GATA3,ECT2           |
| Fc-gamma receptor signaling pathway involved in phagocytosis  | GO:0038096 | 6 | 309 | 80 | 61686 | 14.9723301 | 3.31E-06 | 8.45E-05 | NCKAP1,ACTR2,MAPK1,PIK3R2,PIK3R1,CRK      |
| positive regulation of cell growth                            | GO:0030307 | 6 | 309 | 83 | 61686 | 14.4311615 | 4.11E-06 | 0.00016  | BCL2,ACSL4,AKT1,EGFR,HBEGF,CRK            |

|                                                                  |             |   |     |     |       |            |          |           |                                        |
|------------------------------------------------------------------|-------------|---|-----|-----|-------|------------|----------|-----------|----------------------------------------|
| female pregnancy                                                 | GO:0007565  | 6 | 309 | 84  | 61686 | 14.259362  | 4.41E-06 | 0.0001047 | SLC2A1,BCL2,KRAS,IGFBP2,SLC38A2,ADM    |
| positive regulation of phosphatidylinositol 3-kinase signaling   | GO:0014068  | 6 | 309 | 92  | 61686 | 13.0194175 | 7.47E-06 | 0.0001693 | SIRT1,VEGFA,TEK,PIK3R1,PIK3CG,FGF2     |
| interleukin-1-mediated signaling pathway                         | GO:0070498  | 6 | 309 | 94  | 61686 | 12.7424086 | 8.46E-06 | 0.0001848 | PSMD12,PSMA2,NFKBIA,MAP3K3,IRAK1,IRAK4 |
| G1/S transition of mitotic cell cycle                            | GO:000082   | 6 | 309 | 95  | 61686 | 12.608278  | 9.00E-06 | 0.000193  | CDKN1A,PLK2,CCNE2,RB1,E2F1,GMNN        |
| response to estradiol                                            | GO:0032355  | 6 | 309 | 99  | 61686 | 12.0988526 | 1.14E-05 | 0.0002285 | CCNA2,TFPI,MAP1B,IGFBP2,EZH2,EGFR      |
| neuron migration                                                 | GO:0001764  | 6 | 309 | 100 | 61686 | 11.9778641 | 1.21E-05 | 0.0002381 | CXCR4,CXCL12,MAP1B,GATA3,CRKL,CRK      |
| muscle organ development                                         | GO:0007517  | 6 | 309 | 100 | 61686 | 11.9778641 | 1.21E-05 | 0.0002381 | SIRT1,CD164,FXR1,MEF2A,HBEGF,SOX6      |
| cellular response to insulin stimulus                            | GO:0032869  | 6 | 309 | 101 | 61686 | 11.8592714 | 1.28E-05 | 0.0002501 | PIK3R2,PIK3R1,IRS1,FOXO1,AKT2,AKT1     |
| osteoblast differentiation                                       | GO:0001649  | 6 | 309 | 104 | 61686 | 11.517177  | 1.51E-05 | 0.0002864 | ASF1A,SOX2,AKT1,WNT3A,LGR4,RBMX        |
| anterior/posterior pattern specification                         | GO:0009952  | 6 | 309 | 105 | 61686 | 11.4074896 | 1.60E-05 | 0.0002956 | ACVR2B,SMAD2,HOXC4,HOXA9,WNT3A,CRKL    |
| stimulatory C-type lectin receptor signaling pathway             | GO:0002223  | 6 | 309 | 105 | 61686 | 11.4074896 | 1.60E-05 | 0.0002956 | RAF1,PSMD12,PSMA2,KRAS,MUC17,MUC13     |
| response to virus                                                | GO:0009615  | 6 | 309 | 115 | 61686 | 10.415534  | 2.68E-05 | 0.0004358 | CXCR4,CXCL12,PSMA2,OAS2,STMN1,GATA3    |
| peptidyl-tyrosine phosphorylation                                | GO:00018108 | 6 | 309 | 126 | 61686 | 9.50624133 | 4.48E-05 | 0.0006742 | MERTK,TEK,TWF1,ALK,EPHA4,EGFR          |
| transmembrane receptor protein tyrosine kinase signaling pathway | GO:0007169  | 6 | 309 | 127 | 61686 | 9.43138904 | 4.68E-05 | 0.0006917 | MERTK,TEK,BDNF,ALK,EPHA4,EGFR          |
| protein-containing complex assembly                              | GO:0006503  | 6 | 309 | 127 | 61686 | 9.43138904 | 4.68E-05 | 0.0006917 | CCNB1,ZNF148,SLC2A1,OCLN,APBA1,GMNN    |
| anatomical structure morphogenesis                               | GO:0009653  | 6 | 309 | 129 | 61686 | 9.28516595 | 5.11E-05 | 0.0007325 | SOX4,SOX2,SMAD2,GATA3,EYA4,FBN3        |
| neuron projection                                                | GO:0000000  | 6 | 309 | 130 | 61686 | 9.21374    | 5.33E-05 | 0.0000000 | CAMSAP2,FRY,CNTNAP1,ROCK1,RB1,STMN1    |

|                                                                   |            |   |     |     |       |            |           |           |                                       |
|-------------------------------------------------------------------|------------|---|-----|-----|-------|------------|-----------|-----------|---------------------------------------|
| development                                                       | 031175     |   |     |     |       | 16         | E-05      | 07602     |                                       |
| negative regulation of neuron apoptotic process                   | GO:0043524 | 6 | 309 | 133 | 61686 | 9.00591284 | 6.05E-05  | 0.0008434 | GDF5,BDNF,BCL2,RASA1,LIG4,KRAS        |
| regulation of cell shape                                          | GO:0008360 | 6 | 309 | 143 | 61686 | 8.37612873 | 9.04E-05  | 0.0011598 | VEGFA,RASA1,SYNE3,RHOU,BRWD1,CRK      |
| transcription initiation from RNA polymerase II promoter          | GO:0006367 | 6 | 309 | 154 | 61686 | 7.77783382 | 0.0001358 | 0.0016294 | CDKN1A,NR1D2,CCNB1,TAF15,PGR,GTF2H1   |
| positive regulation of cytosolic calcium ion concentration        | GO:0007204 | 6 | 309 | 155 | 61686 | 7.72765424 | 0.0001407 | 0.0016714 | CXCR4,PIK3CG,LRP6,GNB1,CD55,ADM       |
| chemotaxis                                                        | GO:0006935 | 6 | 309 | 155 | 61686 | 7.72765424 | 0.0001407 | 0.0016714 | CXCR4,CXCL12,MAPK1,PIK3CG,FGF2,CMTM3  |
| peptidyl-serine phosphorylation                                   | GO:0018105 | 6 | 309 | 162 | 61686 | 7.39374326 | 0.0001788 | 0.0019616 | PLK2,BCL2,ROCK1,MAPK1,AKT2,AKT1       |
| proteasome-mediated ubiquitin-dependent protein catabolic process | GO:0043161 | 6 | 309 | 174 | 61686 | 6.88382993 | 0.0002629 | 0.0025801 | SIRT1,PSMD12,PSMA2,UBXN2A,GID4,UBE2W  |
| negative regulation of canonical Wnt signaling pathway            | GO:0090090 | 6 | 309 | 177 | 61686 | 6.76715485 | 0.0002881 | 0.0027388 | FZD6,SOX2,PSMD12,PSMA2,LRP6,IGFBP2    |
| positive regulation of I-kappaB kinase/NF-kappaB signaling        | GO:0043123 | 6 | 309 | 183 | 61686 | 6.54528092 | 0.0003442 | 0.0031486 | PLK2,TSPAN6,MAP3K3,IRAK1,ECT2,IRAK4   |
| positive regulation of ERK1 and ERK2 cascade                      | GO:0070374 | 6 | 309 | 216 | 61686 | 5.54530744 | 0.000822  | 0.0059656 | VEGFA,TEK,BMPER,FGF2,EGFR,CRKL        |
| cell-cell signaling                                               | GO:0007267 | 6 | 309 | 231 | 61686 | 5.18522254 | 0.001161  | 0.0075044 | MERTK,ADGRE5,GDF5,TEK,PGR,GJE1        |
| protein polyubiquitination                                        | GO:0000209 | 6 | 309 | 248 | 61686 | 4.8297839  | 0.0016644 | 0.0100613 | FBXO28,BCL2,PSMD12,PSMA2,TRIM36,UBE2W |
| brain development                                                 | GO:0007420 | 6 | 309 | 253 | 61686 | 4.73433363 | 0.0018401 | 0.0108523 | RAB18,CXCR4,CXCL12,STMN1,GRIN2B,ALK   |
| post-translational protein modification                           | GO:0043687 | 6 | 309 | 304 | 61686 | 3.94008687 | 0.0045335 | 0.0212968 | CALU,ELOC,PSMD12,PSMA2,DCAF17,KLHL11  |
| biological_process                                                | GO:0008150 | 6 | 309 | 318 | 61686 | 3.76662392 | 0.0056199 | 0.0218661 | PLPBP,CALU,DEPDC7,TMEM47,GSTCD,ETNK2  |
| cellular glucose                                                  | GO:0       | 5 | 309 | 22  | 61686 | 45.3706    | 7.50      | 4.04      | SIRT1,RAF1,PIK3R2,PIK3R1,FOXO1        |

|                                                                                               |            |   |     |    |       |            |          |           |                                 |
|-----------------------------------------------------------------------------------------------|------------|---|-----|----|-------|------------|----------|-----------|---------------------------------|
| homeostasis                                                                                   | 001678     |   |     |    |       | 973        | E-08     | E-06      |                                 |
| positive regulation of sprouting angiogenesis                                                 | GO:1903672 | 5 | 309 | 28 | 61686 | 35.648405  | 2.73E-07 | 1.20E-05  | VEGFA,S100A1,FUT1,BMPER,FGF2    |
| positive regulation of lamellipodium assembly                                                 | GO:0010592 | 5 | 309 | 29 | 61686 | 34.4191496 | 3.29E-07 | 1.35E-05  | TWF2,NCKAP1,ACTR2,PIK3R1,OCLN   |
| regulation of cell motility                                                                   | GO:2000145 | 5 | 309 | 31 | 61686 | 32.1985593 | 4.66E-07 | 1.77E-05  | ROCK1,RAF1,EGFR,HBEGF,CRK       |
| positive regulation of cell migration involved in sprouting angiogenesis                      | GO:0090050 | 5 | 309 | 34 | 61686 | 29.35751   | 7.54E-07 | 2.54E-05  | PLK2,VEGFA,PTGS2,MAP3K3,FGF2    |
| cellular response to nerve growth factor stimulus                                             | GO:1990090 | 5 | 309 | 36 | 61686 | 27.7265372 | 1.01E-06 | 3.15E-05  | USP8,ARF6,AKT1,E2F1,CRK         |
| negative regulation of Notch signaling pathway                                                | GO:0045746 | 5 | 309 | 39 | 61686 | 25.5937267 | 1.53E-06 | 4.47E-05  | NFKBIA,AKT1,EGFR,CHAC1,EGFL7    |
| thymus development                                                                            | GO:0048538 | 5 | 309 | 45 | 61686 | 22.1812298 | 3.17E-06 | 8.16E-05  | BCL2,RAF1,MAPK1,GATA3,CRKL      |
| positive regulation of fibroblast proliferation                                               | GO:0048146 | 5 | 309 | 45 | 61686 | 22.1812298 | 3.17E-06 | 8.16E-05  | CDKN1A,CCNB1,CCNA2,LIG4,E2F1    |
| positive regulation of blood vessel endothelial cell migration                                | GO:0043536 | 5 | 309 | 51 | 61686 | 19.5716733 | 5.94E-06 | 0.0001371 | SIRT1,VEGFA,THBS1,FGF2,AKT1     |
| negative regulation of fat cell differentiation                                               | GO:0045599 | 5 | 309 | 52 | 61686 | 19.195295  | 6.54E-06 | 0.0001496 | SIRT1,GATA3,FOXO1,WNT3A,E2F1    |
| phosphatidylinositol-mediated signaling                                                       | GO:0048015 | 5 | 309 | 54 | 61686 | 18.4843581 | 7.90E-06 | 0.0001756 | NCS1,PIK3R2,PIK3R1,PIK3CG,IRS1  |
| regulation of cyclin-dependent protein serine/threonine kinase activity                       | GO:0000079 | 5 | 309 | 55 | 61686 | 18.1482789 | 8.65E-06 | 0.0001872 | CDKN1A,CCNB1,CCNA2,CCNE2,GTF2H1 |
| positive regulation of protein localization to plasma membrane                                | GO:1903078 | 5 | 309 | 57 | 61686 | 17.5114972 | 1.03E-05 | 0.0002122 | PIK3R1,ARF6,AKT1,WNT3A,EGFR     |
| DNA damage response, signal transduction by p53 class mediator resulting in cell cycle arrest | GO:0006977 | 5 | 309 | 58 | 61686 | 17.2095748 | 1.13E-05 | 0.0002274 | CDKN1A,PLK2,CCNB1,SOX4,E2F1     |

|                                                                                   |                   |          |            |            |              |                |                  |                  |                                   |
|-----------------------------------------------------------------------------------|-------------------|----------|------------|------------|--------------|----------------|------------------|------------------|-----------------------------------|
| hippocampus development                                                           | GO:0021766        | 5        | 309        | 64         | 61686        | 15.5961772     | 1.83E-05         | 0.0003356        | ALK,EZH2,WNT3A,CRKL,CRK           |
| SRP-dependent cotranslational protein targeting to membrane                       | GO:0006614        | 5        | 309        | 67         | 61686        | 14.8978409     | 2.29E-05         | 0.0003959        | SSR3,RPS5,RPL7,RPSA,SEC61A1       |
| B cell differentiation                                                            | GO:0030183        | 5        | 309        | 70         | 61686        | 14.259362      | 2.83E-05         | 0.0004575        | VCAM1,BCL2,PIK3R1,EZH2,CR2        |
| negative regulation of protein binding                                            | GO:0032091        | 5        | 309        | 73         | 61686        | 13.6733608     | 3.47E-05         | 0.0005392        | CDKN1A,RACK1,ROCK1,AKT1,GNL3L     |
| cellular response to mechanical stimulus                                          | GO:0071260        | 5        | 309        | 75         | 61686        | 13.3087379     | 3.96E-05         | 0.000603         | SLC2A1,MMP7,AKT1,EGFR,SLC38A2     |
| negative regulation of transforming growth factor beta receptor signaling pathway | GO:0030512        | 5        | 309        | 86         | 61686        | 11.6064574     | 7.63E-05         | 0.0009944        | SIRT1,SPRY1,SMAD2,HSPA1B,SPRED1   |
| response to toxic substance                                                       | GO:0009636        | 5        | 309        | 88         | 61686        | 11.3426743     | 8.51E-05         | 0.0010977        | CDKN1A,CCNB1,KDM5C,BCL2,MAPK1     |
| positive regulation of neuron differentiation                                     | GO:0045666        | 5        | 309        | 91         | 61686        | 10.96874       | 9.98E-05         | 0.001267         | GDF5,TCF4,CXCL12,MAP1B,ECT2       |
| axonogenesis                                                                      | GO:0007409        | 5        | 309        | 92         | 61686        | 10.8495146     | 0.0001051        | 0.0013138        | SPAST,BCL2,MAP1B,STMN1,WNT3A      |
| transcription, DNA-templated                                                      | GO:0006351        | 5        | 309        | 105        | 61686        | 9.50624133     | 0.0001958        | 0.0021189        | PLAGL2,MEF2A,HOXA9,GTF2H1,E2F1    |
| regulation of mRNA stability                                                      | GO:0043488        | 5        | 309        | 112        | 61686        | 8.91210125     | 0.0002644        | 0.0025739        | FXR1,PSMD12,PSMA2,HSPA1B,AKT1     |
| small GTPase mediated signal transduction                                         | GO:0007264        | 5        | 309        | 113        | 61686        | 8.8332331      | 0.0002755        | 0.0026397        | RAB18,ARHGAP32,RHOA,DOCK10,HACD3  |
| Fc-epsilon receptor signaling pathway                                             | GO:0038095        | 5        | 309        | 114        | 61686        | 8.75574859     | 0.000287         | 0.0027388        | PSMD12,PSMA2,MAPK1,PIK3R2,PIK3R1  |
| response to ethanol                                                               | GO:0045471        | 5        | 309        | 117        | 61686        | 8.53124222     | 0.0003236        | 0.0030051        | ACTR2,VCAM1,GRIN2B,GATA3,CYP2E1   |
| translational initiation                                                          | GO:0006413        | 5        | 309        | 117        | 61686        | 8.53124222     | 0.0003236        | 0.0030051        | RPS5,RPL7,RPSA,EIF2S3,AGO2        |
| <b>response to oxidative stress</b>                                               | <b>GO:0006979</b> | <b>5</b> | <b>309</b> | <b>119</b> | <b>61686</b> | <b>8.38786</b> | <b>0.0003498</b> | <b>0.0031761</b> | <b>SIRT1,BCL2,PTGS2,AKT1,EGFR</b> |

|                                                         |            |   |     |     |       |            |           |           |                                    |
|---------------------------------------------------------|------------|---|-----|-----|-------|------------|-----------|-----------|------------------------------------|
| positive regulation of MAPK cascade                     | GO:0043410 | 5 | 309 | 121 | 61686 | 8.24921768 | 0.0003777 | 0.0032816 | VEGFA,TEK,SOX2,ROCK1,FGF2          |
| tumor necrosis factor-mediated signaling pathway        | GO:0033209 | 5 | 309 | 121 | 61686 | 8.24921768 | 0.0003777 | 0.0032816 | TNFRSF17,PSMD12,PSMA2,NFKBIA,FOXO3 |
| negative regulation of angiogenesis                     | GO:0016525 | 5 | 309 | 122 | 61686 | 8.18160115 | 0.0003923 | 0.0033837 | PLK2,THBS1,TEK,ROCK1,SPRED1        |
| regulation of small GTPase mediated signal transduction | GO:0051056 | 5 | 309 | 127 | 61686 | 7.85949086 | 0.0004714 | 0.0039269 | ARHGAP32,PIK3R2,DEPDC7,ECT2,RHOU   |
| negative regulation of endopeptidase activity           | GO:0010951 | 5 | 309 | 128 | 61686 | 7.79808859 | 0.0004886 | 0.0040422 | TFPI,ROCK1,ANXA2,CST9L,AKT1        |
| kidney development                                      | GO:0001822 | 5 | 309 | 131 | 61686 | 7.61950641 | 0.000543  | 0.0043151 | VEGFA,BCL2,GATA3,FAT4,CYP26A1      |
| cell cycle arrest                                       | GO:0007050 | 5 | 309 | 132 | 61686 | 7.56178288 | 0.000562  | 0.004409  | CDKN1A,THBS1,SOX2,RB1,NBN          |
| membrane organization                                   | GO:0061024 | 5 | 309 | 136 | 61686 | 7.3393775  | 0.0006435 | 0.0049361 | CFTR,ACTR2,LDLR,EGFR,HBEGF         |
| protein localization to plasma membrane                 | GO:007259  | 5 | 309 | 145 | 61686 | 6.88382993 | 0.0008587 | 0.0061223 | PIP5K1A,ROCK1,LRP6,AKT2,ZDHHC2     |
| cytoskeleton organization                               | GO:0007010 | 5 | 309 | 151 | 61686 | 6.61030026 | 0.0010294 | 0.0069698 | CNTNAP1,SYNE3,TLN2,RHOU,BRWD1      |
| actin cytoskeleton organization                         | GO:0030036 | 5 | 309 | 171 | 61686 | 5.83716573 | 0.0017823 | 0.0106147 | ACTR2,PDLIM7,ROCK1,KRAS,CRK        |
| transcription by RNA polymerase II                      | GO:0006366 | 5 | 309 | 176 | 61686 | 5.67133716 | 0.0020208 | 0.0116352 | TAF15,ELOC,SOX5,GTF2H1,RBMX        |
| Wnt signaling pathway                                   | GO:0016055 | 5 | 309 | 226 | 61686 | 4.41661655 | 0.0058436 | 0.0225917 | TSPAN12,FZD6,LRP6,WNT3A,LGR4       |
| chemical synaptic transmission                          | GO:0007268 | 5 | 309 | 228 | 61686 | 4.3778743  | 0.0060604 | 0.0231346 | CHRNA5,MAPK1,LRP6,APBA1,GRIN2B     |
| carbohydrate metabolic process                          | GO:0005975 | 5 | 309 | 230 | 61686 | 4.33980583 | 0.0062828 | 0.0237591 | GK,FUT1,AKT2,AKT1,B3GAT1           |
| ion transmembrane transport                             | GO:0034220 | 5 | 309 | 237 | 61686 | 4.21162591 | 0.0071063 | 0.0261789 | CHRNA5,ATP6V0E1,RAF1,KCNJ1,SFXN2   |
| peripheral nervous system myelin maintenance            | GO:0032287 | 4 | 309 | 8   | 61686 | 99.815534  | 4.25E-08  | 2.52E-06  | AKT2,AKT1,SH3TC2,PRX               |

|                                                                                   |            |   |     |    |       |            |          |           |                         |
|-----------------------------------------------------------------------------------|------------|---|-----|----|-------|------------|----------|-----------|-------------------------|
| positive regulation of glucose metabolic process                                  | GO:0010907 | 4 | 309 | 10 | 61686 | 79.8524272 | 1.27E-07 | 6.40E-06  | IRS1,AKT2,AKT1,SLC45A3  |
| positive regulation of keratinocyte migration                                     | GO:0051549 | 4 | 309 | 12 | 61686 | 66.5436893 | 2.96E-07 | 1.24E-05  | ADAM9,MMP9,ARF6,HBEGF   |
| striated muscle cell differentiation                                              | GO:0051146 | 4 | 309 | 18 | 61686 | 44.3624595 | 1.79E-06 | 4.98E-05  | CASP7,RB1,KRAS,AKT1     |
| cell migration involved in sprouting angiogenesis                                 | GO:0002042 | 4 | 309 | 20 | 61686 | 39.9262136 | 2.81E-06 | 7.56E-05  | PIK3R3,VEGFA,FGF2,AKT1  |
| developmental growth                                                              | GO:0048589 | 4 | 309 | 26 | 61686 | 30.712472  | 8.46E-06 | 0.0001865 | BCL2,SMAD2,GATA3,ADM    |
| negative regulation of intrinsic apoptotic signaling pathway                      | GO:2001243 | 4 | 309 | 27 | 61686 | 29.574973  | 9.90E-06 | 0.000205  | VDAC2,BCL2,MMP9,AKT1    |
| digestive tract development                                                       | GO:0048565 | 4 | 309 | 30 | 61686 | 26.6174757 | 1.53E-05 | 0.0002869 | CCNB1,RB1,FAT4,LGR4     |
| positive regulation of DNA repair                                                 | GO:0045739 | 4 | 309 | 32 | 61686 | 24.9538835 | 1.99E-05 | 0.0003596 | SIRT1,SMCHD1,EYA4,EGFR  |
| response to nicotine                                                              | GO:0035094 | 4 | 309 | 32 | 61686 | 24.9538835 | 1.99E-05 | 0.0003596 | CHRNA5,VCAM1,BCL2,MAPK1 |
| cellular response to cadmium ion                                                  | GO:0071276 | 4 | 309 | 33 | 61686 | 24.1977052 | 2.25E-05 | 0.0003929 | MAPK1,MMP9,AKT1,EGFR    |
| negative regulation of extrinsic apoptotic signaling pathway in absence of ligand | GO:2001240 | 4 | 309 | 34 | 61686 | 23.486008  | 2.54E-05 | 0.0004194 | BCL2,HSPA1B,AKT1,EYA4   |
| lipopolysaccharide-mediated signaling pathway                                     | GO:0031663 | 4 | 309 | 34 | 61686 | 23.486008  | 2.54E-05 | 0.0004194 | MAPK1,NFKBIA,IRAK1,AKT1 |
| T cell differentiation                                                            | GO:0030217 | 4 | 309 | 34 | 61686 | 23.486008  | 2.54E-05 | 0.0004194 | SOX4,BCL2,LFNG,GATA3    |
| cellular response to ionizing radiation                                           | GO:0071479 | 4 | 309 | 34 | 61686 | 23.486008  | 2.54E-05 | 0.0004194 | SIRT1,CDKN1A,LIG4,ECT2  |
| energy homeostasis                                                                | GO:0097009 | 4 | 309 | 35 | 61686 | 22.8149792 | 2.86E-05 | 0.0004532 | CRTC1,NR1D2,ALK,FOXO1   |
| Wnt signaling pathway, calcium modulating pathway                                 | GO:0007223 | 4 | 309 | 37 | 61686 | 21.5817371 | 3.58E-05 | 0.0005492 | FZD6,GNB1,TNRC6C,AGO2   |
| ureteric bud                                                                      | GO:0000000 | 4 | 309 | 37 | 61686 | 21.5817371 | 3.58E-05 | 0.0005492 | SPRY1,BCL2,SMAD2,BMPER  |

|                                                                             |            |   |     |    |       |            |           |           |                           |
|-----------------------------------------------------------------------------|------------|---|-----|----|-------|------------|-----------|-----------|---------------------------|
| development                                                                 | 001657     |   |     |    |       | 371        | E-05      | 05492     |                           |
| regulation of neuron projection development                                 | GO:0010975 | 4 | 309 | 40 | 61686 | 19.9631068 | 4.90E-05  | 0.0007105 | NCS1,ARF6,GATA3,AKT1      |
| positive regulation of protein import into nucleus                          | GO:0042307 | 4 | 309 | 40 | 61686 | 19.9631068 | 4.90E-05  | 0.0007105 | MAPK1,PIK3R2,PIK3R1,ECT2  |
| cellular response to reactive oxygen species                                | GO:0034614 | 4 | 309 | 40 | 61686 | 19.9631068 | 4.90E-05  | 0.0007105 | MAPK1,MMP9,AKT1,EGFR      |
| neuron apoptotic process                                                    | GO:0051402 | 4 | 309 | 41 | 61686 | 19.4762018 | 5.40E-05  | 0.0007659 | CASP7,BCL2,RB1,LIG4       |
| animal organ regeneration                                                   | GO:0031100 | 4 | 309 | 43 | 61686 | 18.5703319 | 6.53E-05  | 0.0008997 | CDKN1A,CCNA2,CXCL12,ADM   |
| intrinsic apoptotic signaling pathway in response to DNA damage             | GO:0008630 | 4 | 309 | 45 | 61686 | 17.7449838 | 7.82E-05  | 0.0010143 | SIRT1,BCL2,PIK3R1,E2F1    |
| epidermal growth factor receptor signaling pathway                          | GO:0007173 | 4 | 309 | 48 | 61686 | 16.6359223 | 0.000101  | 0.0012684 | PIK3R1,AKT1,EGFR,HBEGF    |
| heterophilic cell-cell adhesion via plasma membrane cell adhesion molecules | GO:0007157 | 4 | 309 | 48 | 61686 | 16.6359223 | 0.000101  | 0.0012684 | CADM1,CD164,VCAM1,FAT4    |
| cellular response to heat                                                   | GO:0034605 | 4 | 309 | 49 | 61686 | 16.2964137 | 0.0001095 | 0.0013546 | CDKN1A,THBS1,IRAK1,HSPA1B |
| response to hydrogen peroxide                                               | GO:0042542 | 4 | 309 | 53 | 61686 | 15.0664957 | 0.000149  | 0.0017535 | SIRT1,ADAM9,BCL2,CRK      |
| negative regulation of protein ubiquitination                               | GO:0031397 | 4 | 309 | 54 | 61686 | 14.7874865 | 0.0001603 | 0.0018074 | SOX4,HSPA1B,AKT1,GNL3L    |
| blood vessel development                                                    | GO:0001568 | 4 | 309 | 55 | 61686 | 14.5186231 | 0.0001722 | 0.0019236 | MAP3K3,BMPER,EGFL7,CRKL   |
| neurogenesis                                                                | GO:0022008 | 4 | 309 | 56 | 61686 | 14.259362  | 0.0001847 | 0.002017  | CXCR4,WNT3A,FAT4,CHAC1    |
| response to peptide hormone                                                 | GO:0043434 | 4 | 309 | 58 | 61686 | 13.7676599 | 0.0002117 | 0.0022312 | TEK,CXCL12,LRP6,IRS1      |
| negative regulation of G1/S transition of mitotic cell cycle                | GO:2000134 | 4 | 309 | 59 | 61686 | 13.5343097 | 0.0002262 | 0.0023534 | CDKN1A,BCL2,RB1,EZH2      |
| cellular response to transforming growth                                    | GO:00715   | 4 | 309 | 59 | 61686 | 13.5343097 | 0.00022   | 0.00235   | SOX5,SOX6,CRKL,CRK        |



|                                                                                           |            |   |     |    |       |            |           |           |                          |
|-------------------------------------------------------------------------------------------|------------|---|-----|----|-------|------------|-----------|-----------|--------------------------|
| factor beta stimulus                                                                      | 60         |   |     |    |       | 62         | 34        |           |                          |
| response to estrogen                                                                      | GO:0043627 | 4 | 309 | 61 | 61686 | 13.0905618 | 0.0002573 | 0.0025462 | TEK,MAPK1,IGFBP2,GATA3   |
| vasculogenesis                                                                            | GO:0001570 | 4 | 309 | 61 | 61686 | 13.0905618 | 0.0002573 | 0.0025462 | VEGFA,RASA1,EGFL7,ADM    |
| negative regulation of protein kinase B signaling                                         | GO:0051898 | 4 | 309 | 61 | 61686 | 13.0905618 | 0.0002573 | 0.0025462 | SIRT1,OTUD3,RACK1,AKT1   |
| positive regulation of autophagy                                                          | GO:0010508 | 4 | 309 | 62 | 61686 | 12.8794237 | 0.000274  | 0.0026358 | PLK2,ROCK1,FOXO3,FOXO1   |
| negative regulation of neuron death                                                       | GO:1901215 | 4 | 309 | 63 | 61686 | 12.6749884 | 0.0002914 | 0.0027597 | SIRT1,KIR3DL2,AKT1,WNT3A |
| I-kappaB kinase/NF-kappaB signaling                                                       | GO:0007249 | 4 | 309 | 64 | 61686 | 12.4769417 | 0.0003097 | 0.0028981 | ROCK1,NFKBIA,AKT1,HACD3  |
| NIK/NF-kappaB signaling                                                                   | GO:0038061 | 4 | 309 | 65 | 61686 | 12.2849888 | 0.0003287 | 0.0030293 | PSMD12,PSMA2,ALK,AKT1    |
| cellular response to hydrogen peroxide                                                    | GO:0070301 | 4 | 309 | 65 | 61686 | 12.2849888 | 0.0003287 | 0.0030293 | SIRT1,FOXO1,EZH2,ECT2    |
| neuron projection morphogenesis                                                           | GO:0048812 | 4 | 309 | 66 | 61686 | 12.0988526 | 0.0003485 | 0.0031759 | NCKAP1,CNTNAP1,BDNF,EGFR |
| negative regulation of cysteine-type endopeptidase activity involved in apoptotic process | GO:0043154 | 4 | 309 | 67 | 61686 | 11.9182727 | 0.0003692 | 0.0033268 | VEGFA,THBS1,RAF1,AKT1    |
| peptidyl-threonine phosphorylation                                                        | GO:0018107 | 4 | 309 | 67 | 61686 | 11.9182727 | 0.0003692 | 0.0033268 | BCL2,ROCK1,MAPK1,AKT1    |
| regulation of transcription from RNA polymerase II promoter in response to hypoxia        | GO:0061418 | 4 | 309 | 68 | 61686 | 11.743004  | 0.0003907 | 0.0033825 | VEGFA,ELOC,PSMD12,PSMA2  |
| regulation of protein localization                                                        | GO:0032880 | 4 | 309 | 69 | 61686 | 11.5728155 | 0.0004131 | 0.0035139 | RACK1,USP8,BCL2,AKT1     |
| positive regulation of proteasomal ubiquitin-dependent protein catabolic process          | GO:0032436 | 4 | 309 | 72 | 61686 | 11.0906149 | 0.0004859 | 0.0040337 | PLK2,RACK1,HSPA1B,AKT1   |
| cartilage development                                                                     | GO:00512   | 4 | 309 | 74 | 61686 | 10.7908685 | 0.00053   | 0.00429   | GDF5,SOX5,HOXC4,SOX6     |

|                                                                  |            |   |     |     |       |            |           |           |                           |
|------------------------------------------------------------------|------------|---|-----|-----|-------|------------|-----------|-----------|---------------------------|
|                                                                  | 16         |   |     |     |       |            | 92        | 94        |                           |
| regulation of cellular response to heat                          | GO:1900034 | 4 | 309 | 75  | 61686 | 10.6469903 | 0.0005673 | 0.0044363 | SIRT1,NUP50,MAPK1,HSPA1B  |
| phagocytosis                                                     | GO:0006909 | 4 | 309 | 76  | 61686 | 10.5068983 | 0.0005965 | 0.0046495 | TUSC2,MERTK,PIP5K1A,LDLR  |
| positive regulation of translation                               | GO:0045727 | 4 | 309 | 78  | 61686 | 10.2374907 | 0.000658  | 0.0050161 | FXR1,THBS1,SOX4,MAPK1     |
| negative regulation of protein phosphorylation                   | GO:0001933 | 4 | 309 | 78  | 61686 | 10.2374907 | 0.000658  | 0.0050161 | CCNB1,OCLN,LRP6,CRKL      |
| negative regulation of DNA-binding transcription factor activity | GO:0043433 | 4 | 309 | 84  | 61686 | 9.50624133 | 0.0008695 | 0.0061806 | SIRT1,FZD6,RB1,EZH2       |
| regulation of GTPase activity                                    | GO:0043087 | 4 | 309 | 85  | 61686 | 9.3944032  | 0.0009088 | 0.0063124 | EVI5,RASA1,EPHA4,CRK      |
| response to organic substance                                    | GO:0010033 | 4 | 309 | 85  | 61686 | 9.3944032  | 0.0009088 | 0.0063124 | CDKN1A,TEK,AKT1,ADM       |
| negative regulation of protein kinase activity                   | GO:0006469 | 4 | 309 | 86  | 61686 | 9.28516595 | 0.0009494 | 0.0064648 | RB1,LRP6,SPRED1,AKT1      |
| viral transcription                                              | GO:0019083 | 4 | 309 | 86  | 61686 | 9.28516595 | 0.0009494 | 0.0064648 | NUP50,RPS5,RPL7,RPSA      |
| response to endoplasmic reticulum stress                         | GO:0034976 | 4 | 309 | 87  | 61686 | 9.17843991 | 0.0009913 | 0.0067309 | CFTR,THBS1,PIK3R2,PIK3R1  |
| negative regulation of NF-kappaB transcription factor activity   | GO:0032088 | 4 | 309 | 89  | 61686 | 8.97218283 | 0.0010789 | 0.0072647 | SIRT1,NFKBIA,IRAK1,PARP10 |
| lung development                                                 | GO:0030324 | 4 | 309 | 93  | 61686 | 8.58628249 | 0.0012702 | 0.0081024 | VEGFA,SMAD2,FGF2,EGFR     |
| protein homooligomerization                                      | GO:0051260 | 4 | 309 | 95  | 61686 | 8.40551865 | 0.0013742 | 0.0084973 | SPAST,KCTD4,ECT2,RBMX     |
| cellular response to oxidative stress                            | GO:0034599 | 4 | 309 | 101 | 61686 | 7.90618091 | 0.0017216 | 0.0102785 | STAU1,HSPA1B,FOXO3,FOXO1  |
| male gonad development                                           | GO:0008584 | 4 | 309 | 105 | 61686 | 7.60499307 | 0.0019844 | 0.0114526 | BCL2,HOXA9,GATA3,CRKL     |
| ossification                                                     | GO:0001503 | 4 | 309 | 106 | 61686 | 7.53324785 | 0.0020542 | 0.0117714 | PDLIM7,BCL2,MMP9,EGFR     |

|                                                                 |            |   |     |     |       |            |           |           |                             |
|-----------------------------------------------------------------|------------|---|-----|-----|-------|------------|-----------|-----------|-----------------------------|
| transforming growth factor beta receptor signaling pathway      | GO:007179  | 4 | 309 | 107 | 61686 | 7.46284366 | 0.0021256 | 0.0121522 | SIRT1,ADAM9,GDF5,SMAD2      |
| homophilic cell adhesion via plasma membrane adhesion molecules | GO:007156  | 4 | 309 | 114 | 61686 | 7.00459888 | 0.0026746 | 0.0142487 | CADM1,CDH3,FAT3,FAT4        |
| negative regulation of inflammatory response                    | GO:0050728 | 4 | 309 | 124 | 61686 | 6.43971187 | 0.0036167 | 0.0181883 | NR1D2,TEK,RB1,GATA3         |
| regulation of signal transduction by p53 class mediator         | GO:1901796 | 4 | 309 | 130 | 61686 | 6.1424944  | 0.0042782 | 0.0205759 | RRS1,TAF15,NBN,AKT1         |
| central nervous system development                              | GO:0007417 | 4 | 309 | 144 | 61686 | 5.54530744 | 0.0061283 | 0.0233201 | NCKAP1,SLC2A1,LIG4,SOX6     |
| negative regulation of cell migration                           | GO:0030336 | 4 | 309 | 144 | 61686 | 5.54530744 | 0.0061283 | 0.0233201 | BCL2,ARID2,FOXO3,OSBPL8     |
| regulation of immune response                                   | GO:0050776 | 4 | 309 | 145 | 61686 | 5.50706394 | 0.0062777 | 0.023777  | CD226,VCAM1,KIR3DL2,KIR3DL1 |
| DNA replication                                                 | GO:0006260 | 4 | 309 | 152 | 61686 | 5.25344916 | 0.0073923 | 0.0271912 | NBN,NAP1L1,LIG4,POLK        |
| protein dephosphorylation                                       | GO:0006470 | 4 | 309 | 168 | 61686 | 4.75312067 | 0.0104103 | 0.0307738 | BCL2,PTPN7,EYA4,CTDSPL2     |
| neuron differentiation                                          | GO:0030182 | 4 | 309 | 172 | 61686 | 4.64258298 | 0.0112722 | 0.0326448 | RB1,GATA3,ACSL4,WNT3A       |
| positive regulation of NF-kappaB transcription factor activity  | GO:0051092 | 4 | 309 | 163 | 61686 | 4.89892191 | 0.0093945 | 0.0328603 | KRAS,IRAK1,HSPA1B,ALK       |
| endoplasmic reticulum to Golgi vesicle-mediated transport       | GO:0006888 | 4 | 309 | 180 | 61686 | 4.43624595 | 0.0131307 | 0.0373138 | YKT6,SPAST,CD55,IER3IP1     |
| methylation                                                     | GO:0032259 | 4 | 309 | 180 | 61686 | 4.43624595 | 0.0131307 | 0.0373138 | EZH2,DNMT1,PRDM15,SETD5     |
| fatty acid metabolic process                                    | GO:0006631 | 4 | 309 | 188 | 61686 | 4.24746953 | 0.0151737 | 0.0381151 | PTGS2,ACSL4,CYP2E1,HACD3    |
| cellular protein metabolic process                              | GO:0044267 | 4 | 309 | 199 | 61686 | 4.01268478 | 0.0182941 | 0.0449745 | CALU,IGFBP2,L2HGDH,ZDHHC2   |
| regulation of cell population proliferation                     | GO:0042127 | 4 | 309 | 201 | 61686 | 3.97275757 | 0.018901  | 0.0464195 | SIRT1,NFKBIA,ALK,EZH2       |

|                                                                            |            |   |     |    |       |            |           |           |                       |
|----------------------------------------------------------------------------|------------|---|-----|----|-------|------------|-----------|-----------|-----------------------|
| negative regulation of long-chain fatty acid import across plasma membrane | GO:0010748 | 3 | 309 | 4  | 61686 | 149.723301 | 4.96E-07  | 1.82E-05  | THBS1,AKT2,AKT1       |
| positive regulation of Rac protein signal transduction                     | GO:0035022 | 3 | 309 | 7  | 61686 | 85.556172  | 4.29E-06  | 0.000104  | PIK3CG,KRAS,RTN4      |
| postsynapse to nucleus signaling pathway                                   | GO:0099527 | 3 | 309 | 7  | 61686 | 85.556172  | 4.29E-06  | 0.000104  | CRTC1,KPNA1,WNT3A     |
| organ growth                                                               | GO:0035265 | 3 | 309 | 10 | 61686 | 59.8893204 | 1.46E-05  | 0.000278  | BCL2,SMAD2,GJE1       |
| hepatocyte apoptotic process                                               | GO:0097284 | 3 | 309 | 10 | 61686 | 59.8893204 | 1.46E-05  | 0.000278  | RB1,PIK3CG,ARF6       |
| insulin-like growth factor receptor signaling pathway                      | GO:0048009 | 3 | 309 | 12 | 61686 | 49.907767  | 2.65E-05  | 0.000438  | PIK3R1,IRS1,AKT1      |
| regulation of cell adhesion mediated by integrin                           | GO:0033628 | 3 | 309 | 13 | 61686 | 46.068708  | 3.43E-05  | 0.0005364 | PIK3CG,CRKL,CRK       |
| cellular response to nitric oxide                                          | GO:0071732 | 3 | 309 | 15 | 61686 | 39.9262136 | 5.42E-05  | 0.0007589 | CCNA2,FOXO1,CRK       |
| positive regulation of RNA splicing                                        | GO:0033120 | 3 | 309 | 15 | 61686 | 39.9262136 | 5.42E-05  | 0.0007589 | PIK3R1,HSPA1B,SLC38A2 |
| positive regulation of dendrite development                                | GO:0090006 | 3 | 309 | 16 | 61686 | 37.4308252 | 6.64E-05  | 0.0008994 | CRTC1,ALK,EZH2        |
| positive regulation of glycogen biosynthetic process                       | GO:0045725 | 3 | 309 | 16 | 61686 | 37.4308252 | 6.64E-05  | 0.0008994 | IRS1,AKT2,AKT1        |
| positive regulation of chondrocyte differentiation                         | GO:0032332 | 3 | 309 | 16 | 61686 | 37.4308252 | 6.64E-05  | 0.0008994 | GDF5,SOX5,SOX6        |
| negative regulation of phosphorylation                                     | GO:0042326 | 3 | 309 | 18 | 61686 | 33.2718447 | 9.61E-05  | 0.0012256 | SIRT1,CDKN1A,ROCK1    |
| regulation of establishment of cell polarity                               | GO:0000114 | 3 | 309 | 19 | 61686 | 31.5206949 | 0.0001137 | 0.0003775 | RACK1,ROCK1,GATA3     |
| mitotic cell cycle phase transition                                        | GO:0044772 | 3 | 309 | 19 | 61686 | 31.5206949 | 0.0001137 | 0.0003775 | CCNB1,CCNA2,CCNE2     |
| regulation of dendrite development                                         | GO:0050773 | 3 | 309 | 19 | 61686 | 31.5206949 | 0.0001137 | 0.0003775 | CAMSAP2,CRKL,CRK      |
| regulation of phosphatidylinositol                                         | GO:00435   | 3 | 309 | 19 | 61686 | 31.5206949 | 0.0001137 | 0.0003775 | PIK3R3,PIK3R2,PIK3R1  |

|                                                                            |             |   |     |    |       |            |           |           |                    |
|----------------------------------------------------------------------------|-------------|---|-----|----|-------|------------|-----------|-----------|--------------------|
| 3-kinase activity                                                          | 51          |   |     |    |       |            | 37        | 75        |                    |
| leukocyte tethering or rolling                                             | GO:0050901  | 3 | 309 | 20 | 61686 | 29.9446602 | 0.0001332 | 0.0016065 | VCAM1,ROCK1,GCNT1  |
| negative regulation of cell-matrix adhesion                                | GO:0001953  | 3 | 309 | 21 | 61686 | 28.518724  | 0.0001548 | 0.0017539 | THBS1,RASA1,PIK3R1 |
| regulation of phosphatidylinositol 3-kinase signaling                      | GO:0014066  | 3 | 309 | 21 | 61686 | 28.518724  | 0.0001548 | 0.0017539 | PIP5K1A,MAPK1,EGFR |
| macrophage differentiation                                                 | GO:0030225  | 3 | 309 | 22 | 61686 | 27.2224184 | 0.0001786 | 0.0019681 | SIRT1,VEGFA,MMP9   |
| negative regulation of fibroblast growth factor receptor signaling pathway | GO:0040037  | 3 | 309 | 22 | 61686 | 27.2224184 | 0.0001786 | 0.0019681 | SPRY1,THBS1,FGF2   |
| membrane protein ectodomain proteolysis                                    | GO:0006509  | 3 | 309 | 22 | 61686 | 27.2224184 | 0.0001786 | 0.0019681 | ADAM9,MMP7,RBMX    |
| positive regulation of insulin receptor signaling pathway                  | GO:0046628  | 3 | 309 | 23 | 61686 | 26.038835  | 0.0002047 | 0.0021663 | SIRT1,IRS1,OSBPL8  |
| protein ADP-ribosylation                                                   | GO:0006471  | 3 | 309 | 23 | 61686 | 26.038835  | 0.0002047 | 0.0021663 | SIRT1,ART4,PARP10  |
| positive regulation of long-term synaptic potentiation                     | GO:00900273 | 3 | 309 | 23 | 61686 | 26.038835  | 0.0002047 | 0.0021663 | CRTC1,STAU1,ZDHHC2 |
| tissue regeneration                                                        | GO:0042246  | 3 | 309 | 23 | 61686 | 26.038835  | 0.0002047 | 0.0021663 | CDKN1A,CCNB1,SOX2  |
| positive regulation of nitric-oxide synthase activity                      | GO:0005100  | 3 | 309 | 23 | 61686 | 26.038835  | 0.0002047 | 0.0021663 | S100A1,KRAS,AKT1   |
| negative regulation of protein serine/threonine kinase activity            | GO:00071901 | 3 | 309 | 24 | 61686 | 24.9538835 | 0.000233  | 0.0023935 | RB1,LRP6,AKT1      |
| negative regulation of cellular senescence                                 | GO:0000773  | 3 | 309 | 24 | 61686 | 24.9538835 | 0.000233  | 0.0023935 | SIRT1,PLK2,MAP3K3  |
| positive regulation of focal adhesion assembly                             | GO:00051894 | 3 | 309 | 25 | 61686 | 23.9557282 | 0.0002638 | 0.0025787 | VEGFA,TEK,ROCK1    |
| endocrine pancreas development                                             | GO:00031018 | 3 | 309 | 26 | 61686 | 23.034354  | 0.0002971 | 0.0027916 | SOX4,FOXO1,AKT1    |
| cellular response to fatty acid                                            | GO:000713   | 3 | 309 | 26 | 61686 | 23.034354  | 0.0002971 | 0.0027916 | CCNB1,IRS1,E2F1    |

|                                                                                  |            |   |     |    |       |            |           |           |                      |
|----------------------------------------------------------------------------------|------------|---|-----|----|-------|------------|-----------|-----------|----------------------|
|                                                                                  | 98         |   |     |    |       | 71         | 16        |           |                      |
| response to gamma radiation                                                      | GO:0010332 | 3 | 309 | 27 | 61686 | 22.1812298 | 0.000333  | 0.0030579 | BCL2,LIG4,GATA3      |
| cochlea development                                                              | GO:0090102 | 3 | 309 | 28 | 61686 | 21.389043  | 0.0003716 | 0.003252  | CCNA2,GATA3,EPHA4    |
| regulation of calcium ion transport                                              | GO:0051924 | 3 | 309 | 29 | 61686 | 20.6514898 | 0.000413  | 0.0035247 | CXCR4,CXCL12,BCL2    |
| cortical actin cytoskeleton organization                                         | GO:0030866 | 3 | 309 | 29 | 61686 | 20.6514898 | 0.000413  | 0.0035247 | NCKAP1,ROCK1,ARF6    |
| negative regulation of MAPK cascade                                              | GO:0043409 | 3 | 309 | 29 | 61686 | 20.6514898 | 0.000413  | 0.0035247 | PIK3R2,SPRED1,PRDM15 |
| negative regulation of apoptotic signaling pathway                               | GO:2001234 | 3 | 309 | 30 | 61686 | 19.9631068 | 0.0004572 | 0.0038212 | BDNF,BCL2,RB1        |
| midbrain development                                                             | GO:0030901 | 3 | 309 | 30 | 61686 | 19.9631068 | 0.0004572 | 0.0038212 | FZD6,LRP6,WNT3A      |
| positive regulation of cardiac muscle cell proliferation                         | GO:0060045 | 3 | 309 | 30 | 61686 | 19.9631068 | 0.0004572 | 0.0038212 | CCNB1,MAPK1,FGF2     |
| positive regulation of cyclin-dependent protein serine/threonine kinase activity | GO:0045737 | 3 | 309 | 30 | 61686 | 19.9631068 | 0.0004572 | 0.0038212 | CCNB1,AKT1,EGFR      |
| cellular response to dexamethasone stimulus                                      | GO:0071549 | 3 | 309 | 30 | 61686 | 19.9631068 | 0.0004572 | 0.0038212 | USP8,FOXO1,EGFR      |
| positive regulation of phosphorylation                                           | GO:0042327 | 3 | 309 | 31 | 61686 | 19.3191356 | 0.0005043 | 0.0041156 | VEGFA,THBS1,EGFR     |
| ERBB2 signaling pathway                                                          | GO:0038128 | 3 | 309 | 31 | 61686 | 19.3191356 | 0.0005043 | 0.0041156 | PIK3R1,EGFR,HBEGF    |
| mammary gland development                                                        | GO:0030879 | 3 | 309 | 31 | 61686 | 19.3191356 | 0.0005043 | 0.0041156 | PGR,HOXA9,WNT3A      |
| aortic valve morphogenesis                                                       | GO:0003180 | 3 | 309 | 31 | 61686 | 19.3191356 | 0.0005043 | 0.0041156 | ROCK1,RB1,GATA3      |
| regulation of microtubule cytoskeleton organization                              | GO:0070507 | 3 | 309 | 32 | 61686 | 18.7154126 | 0.0005544 | 0.004363  | ROCK1,WNT3A,TRIM36   |
| regulation of neuron differentiation                                             | GO:00456   | 3 | 309 | 32 | 61686 | 18.7154126 | 0.0005544 | 0.004363  | BDNF,ROCK1,ALK       |

|                                                                           |            |   |     |    |       |            |           |           |                      |
|---------------------------------------------------------------------------|------------|---|-----|----|-------|------------|-----------|-----------|----------------------|
|                                                                           | 64         |   |     |    |       |            | 44        | 3         |                      |
| positive regulation of phosphatidylinositol 3-kinase activity             | GO:0043552 | 3 | 309 | 32 | 61686 | 18.7154126 | 0.0005544 | 0.004363  | TEK,IRS1,FGF2        |
| microtubule bundle formation                                              | GO:0001578 | 3 | 309 | 33 | 61686 | 18.1482789 | 0.0006076 | 0.0046753 | SPAST,MAP1B,CCSER2   |
| T cell differentiation in thymus                                          | GO:0033077 | 3 | 309 | 33 | 61686 | 18.1482789 | 0.0006076 | 0.0046753 | BCL2,LIG4,GATA3      |
| negative regulation of DNA binding                                        | GO:0043392 | 3 | 309 | 33 | 61686 | 18.1482789 | 0.0006076 | 0.0046753 | NFKBIA,E2F1,C6orf106 |
| positive regulation of neurogenesis                                       | GO:0050769 | 3 | 309 | 33 | 61686 | 18.1482789 | 0.0006076 | 0.0046753 | CXCR4,NAP1L1,LIG4    |
| cell maturation                                                           | GO:0048469 | 3 | 309 | 34 | 61686 | 17.614506  | 0.0006639 | 0.0049977 | TUSC2,VEGFA,GATA3    |
| sprouting angiogenesis                                                    | GO:0002040 | 3 | 309 | 34 | 61686 | 17.614506  | 0.0006639 | 0.0049977 | VEGFA,THBS1,TEK      |
| cellular response to vascular endothelial growth factor stimulus          | GO:0035924 | 3 | 309 | 34 | 61686 | 17.614506  | 0.0006639 | 0.0049977 | VEGFA,VCAM1,AKT1     |
| endosome organization                                                     | GO:0007032 | 3 | 309 | 35 | 61686 | 17.1112344 | 0.0007234 | 0.005314  | USP8,RAB5B,HOOK3     |
| negative regulation of cytokine production                                | GO:0001818 | 3 | 309 | 36 | 61686 | 16.6359223 | 0.0007863 | 0.0057237 | MERTK,RNF128,LGR4    |
| regulation of angiogenesis                                                | GO:0045765 | 3 | 309 | 36 | 61686 | 16.6359223 | 0.0007863 | 0.0057237 | TSPAN12,BMPER,FGF2   |
| negative regulation of epidermal growth factor receptor signaling pathway | GO:0042059 | 3 | 309 | 37 | 61686 | 16.1863028 | 0.0008525 | 0.0060959 | SPRY1,EGFR,HBEGF     |
| negative regulation of epithelial to mesenchymal transition               | GO:0010719 | 3 | 309 | 37 | 61686 | 16.1863028 | 0.0008525 | 0.0060959 | SPRY1,GATA3,SPRED1   |
| adherens junction organization                                            | GO:0034332 | 3 | 309 | 37 | 61686 | 16.1863028 | 0.0008525 | 0.0060959 | CADM1,CDH3,EPHA4     |
| negative regulation of mitotic cell cycle                                 | GO:0045930 | 3 | 309 | 37 | 61686 | 16.1863028 | 0.0008525 | 0.0060959 | BCL2,RB1,EGFR        |

|                                                                     |            |   |     |    |       |            |           |           |                      |
|---------------------------------------------------------------------|------------|---|-----|----|-------|------------|-----------|-----------|----------------------|
| dendrite development                                                | GO:0016358 | 3 | 309 | 37 | 61686 | 16.1863028 | 0.0008525 | 0.0060959 | MAP1B,CRKL,CRK       |
| carbohydrate transport                                              | GO:0008643 | 3 | 309 | 38 | 61686 | 15.7603475 | 0.0009222 | 0.0063146 | SLC2A1,AKT2,AKT1     |
| branching involved in ureteric bud morphogenesis                    | GO:0001658 | 3 | 309 | 38 | 61686 | 15.7603475 | 0.0009222 | 0.0063146 | BCL2,FGF2,FAT4       |
| hair follicle development                                           | GO:0001942 | 3 | 309 | 38 | 61686 | 15.7603475 | 0.0009222 | 0.0063146 | FZD6,EGFR,LGR4       |
| negative regulation of cell differentiation                         | GO:0004596 | 3 | 309 | 38 | 61686 | 15.7603475 | 0.0009222 | 0.0063146 | MAPK1,KRAS,PRAMEF1   |
| protein kinase B signaling                                          | GO:0004391 | 3 | 309 | 38 | 61686 | 15.7603475 | 0.0009222 | 0.0063146 | MERTK,PIK3R3,AKT1    |
| positive regulation of intrinsic apoptotic signaling pathway        | GO:2001244 | 3 | 309 | 40 | 61686 | 14.9723301 | 0.0010721 | 0.0072388 | RACK1,BCL2,PLAGL2    |
| phospholipid transport                                              | GO:0001594 | 3 | 309 | 41 | 61686 | 14.6071513 | 0.0011525 | 0.0074693 | PITPNC1,LDLR,OSBPL8  |
| positive regulation of B cell proliferation                         | GO:0003090 | 3 | 309 | 41 | 61686 | 14.6071513 | 0.0011525 | 0.0074693 | CDKN1A,BCL2,WNT3A    |
| long-term synaptic potentiation                                     | GO:0006091 | 3 | 309 | 42 | 61686 | 14.259362  | 0.0012365 | 0.0079085 | PLK2,MAPK1,GRIN2B    |
| positive regulation of pri-miRNA transcription by RNA polymerase II | GO:1902895 | 3 | 309 | 42 | 61686 | 14.259362  | 0.0012365 | 0.0079085 | GATA3,FOXO3,FGF2     |
| negative regulation of viral genome replication                     | GO:0004571 | 3 | 309 | 42 | 61686 | 14.259362  | 0.0012365 | 0.0079085 | PLSCR1,OAS2,PARP10   |
| collagen catabolic process                                          | GO:0003074 | 3 | 309 | 43 | 61686 | 13.9277489 | 0.0013244 | 0.0083819 | MMP13,MMP9,MMP7      |
| regulation of synaptic vesicle exocytosis                           | GO:2000300 | 3 | 309 | 43 | 61686 | 13.9277489 | 0.0013244 | 0.0083819 | CHRNA5,NCS1,APBA1    |
| mitotic metaphase plate congression                                 | GO:0007080 | 3 | 309 | 43 | 61686 | 13.9277489 | 0.0013244 | 0.0083819 | RRS1,CCNB1,EML4      |
| O-glycan processing                                                 | GO:0001666 | 3 | 309 | 44 | 61686 | 13.6112092 | 0.001416  | 0.008734  | GCNT1,MUC17,MUC13    |
| cellular response to amino acid                                     | GO:000341  | 3 | 309 | 45 | 61686 | 13.3087379 | 0.00151   | 0.00927   | CDKN1A,MAPK1,SLC38A2 |



|                                                                             |            |   |     |    |       |            |           |           |                     |
|-----------------------------------------------------------------------------|------------|---|-----|----|-------|------------|-----------|-----------|---------------------|
| starvation                                                                  | 98         |   |     |    |       |            | 16        | 62        |                     |
| toll-like receptor signaling pathway                                        | GO:002224  | 3 | 309 | 45 | 61686 | 13.3087379 | 0.0015116 | 0.0092762 | S100A1,IRAK1,IRAK4  |
| cytoplasmic microtubule organization                                        | GO:0031122 | 3 | 309 | 46 | 61686 | 13.0194175 | 0.0016111 | 0.0097632 | CAMSAP2,SPAST,HOOK3 |
| regulation of signal transduction                                           | GO:0009966 | 3 | 309 | 47 | 61686 | 12.7424086 | 0.0017146 | 0.0102622 | SPRY1,SPRED1,CRK    |
| negative regulation of cold-induced thermogenesis                           | GO:0120163 | 3 | 309 | 47 | 61686 | 12.7424086 | 0.0017146 | 0.0102622 | ACVR2B,RB1,LGR4     |
| cellular response to glucose starvation                                     | GO:0042149 | 3 | 309 | 47 | 61686 | 12.7424086 | 0.0017146 | 0.0102622 | SLC2A1,BCL2,FOXO3   |
| regulation of mitotic cell cycle                                            | GO:0007346 | 3 | 309 | 47 | 61686 | 12.7424086 | 0.0017146 | 0.0102622 | SIRT1,CDKN1A,RB1    |
| negative regulation of cell adhesion                                        | GO:0007162 | 3 | 309 | 48 | 61686 | 12.4769417 | 0.0018222 | 0.010773  | CD164,RASA1,PIK3R1  |
| positive regulation of vascular associated smooth muscle cell proliferation | GO:1904707 | 3 | 309 | 48 | 61686 | 12.4769417 | 0.0018222 | 0.010773  | MMP9,FGF2,DNMT1     |
| hormone-mediated signaling pathway                                          | GO:0009755 | 3 | 309 | 48 | 61686 | 12.4769417 | 0.0018222 | 0.010773  | NR1D2,GTF2H1,LGR4   |
| inner ear development                                                       | GO:0048839 | 3 | 309 | 49 | 61686 | 12.2223103 | 0.0019339 | 0.0111878 | SOX2,BMPER,EYA4     |
| negative regulation of cell cycle                                           | GO:0045786 | 3 | 309 | 49 | 61686 | 12.2223103 | 0.0019339 | 0.0111878 | RB1,GATA3,GMNN      |
| mitotic spindle organization                                                | GO:0007052 | 3 | 309 | 50 | 61686 | 11.9778641 | 0.0020497 | 0.0117738 | PLK2,CCNB1,STMN1    |
| pattern specification process                                               | GO:0007389 | 3 | 309 | 52 | 61686 | 11.517177  | 0.0022942 | 0.012639  | SMAD2,LFNG,CRKL     |
| JNK cascade                                                                 | GO:0007254 | 3 | 309 | 53 | 61686 | 11.2998718 | 0.0024229 | 0.0132279 | IRAK1,IRAK4,CRKL    |
| heart morphogenesis                                                         | GO:0003007 | 3 | 309 | 53 | 61686 | 11.2998718 | 0.0024229 | 0.0132279 | VEGFA,ARID2,FAT4    |
| regulation of cell adhesion                                                 | GO:0030155 | 3 | 309 | 53 | 61686 | 11.2998718 | 0.0024229 | 0.0132279 | CXCR4,ROCK1,FUT1    |

|                                                            |            |   |     |    |       |            |           |           |                      |
|------------------------------------------------------------|------------|---|-----|----|-------|------------|-----------|-----------|----------------------|
| positive regulation of protein-containing complex assembly | GO:0031334 | 3 | 309 | 53 | 61686 | 11.2998718 | 0.0024229 | 0.0132279 | RACK1,VEGFA,GNL3L    |
| synapse assembly                                           | GO:0007416 | 3 | 309 | 54 | 61686 | 11.0906149 | 0.002556  | 0.0136471 | BDNF,MAP1B,CRKL      |
| inner ear morphogenesis                                    | GO:0042472 | 3 | 309 | 54 | 61686 | 11.0906149 | 0.002556  | 0.0136471 | FZD6,GATA3,WNT3A     |
| positive regulation of cytokine production                 | GO:0001819 | 3 | 309 | 55 | 61686 | 10.8889673 | 0.0026936 | 0.0143183 | CADM1,GATA3,WNT3A    |
| amino acid transport                                       | GO:0006865 | 3 | 309 | 56 | 61686 | 10.6945215 | 0.0028356 | 0.0150074 | SLC7A5,SFXN2,SLC38A2 |
| substrate adhesion-dependent cell spreading                | GO:0034446 | 3 | 309 | 56 | 61686 | 10.6945215 | 0.0028356 | 0.0150074 | MERTK,TEK,PIK3R1     |
| cellular response to cytokine stimulus                     | GO:0071345 | 3 | 309 | 57 | 61686 | 10.5068983 | 0.0029821 | 0.0154457 | CXCR4,PTPN7,GATA3    |
| excitatory postsynaptic potential                          | GO:0060079 | 3 | 309 | 58 | 61686 | 10.3257449 | 0.0031332 | 0.0161593 | CHRNA5,GRIN2B,AKT1   |
| response to calcium ion                                    | GO:0051592 | 3 | 309 | 59 | 61686 | 10.1507323 | 0.0032889 | 0.0166786 | ADAM9,THBS1,EGFR     |
| negative regulation of epithelial cell proliferation       | GO:0050680 | 3 | 309 | 60 | 61686 | 9.9815534  | 0.0034493 | 0.0174191 | GDF5,SOX2,RB1        |
| positive regulation of epithelial cell proliferation       | GO:0050679 | 3 | 309 | 60 | 61686 | 9.9815534  | 0.0034493 | 0.0174191 | VEGFA,FGF2,EGFR      |
| cellular response to glucose stimulus                      | GO:0071333 | 3 | 309 | 61 | 61686 | 9.81792138 | 0.0036144 | 0.0182149 | RACK1,ZNF236,SOX4    |
| learning or memory                                         | GO:0007611 | 3 | 309 | 62 | 61686 | 9.6595678  | 0.0037843 | 0.0187589 | MAPK1,GRIN2B,EGFR    |
| cellular response to organic cyclic compound               | GO:0071407 | 3 | 309 | 63 | 61686 | 9.50624133 | 0.0039589 | 0.0195846 | CCNB1,CCNA2,AKT1     |
| extracellular matrix disassembly                           | GO:0022617 | 3 | 309 | 64 | 61686 | 9.35770631 | 0.0041384 | 0.0199433 | MMP13,MMP9,MMP7      |
| cellular response to drug                                  | GO:0035690 | 3 | 309 | 64 | 61686 | 9.35770631 | 0.0041384 | 0.0199433 | CXCR4,EGFR,CRKL      |
| regulation of hematopoietic stem                           | GO:19020   | 3 | 309 | 65 | 61686 | 9.2137416  | 0.00432   | 0.02070   | PSMD12,PSMA2,GATA3   |

|                                                   |              |   |     |    |       |            |           |           |                      |
|---------------------------------------------------|--------------|---|-----|----|-------|------------|-----------|-----------|----------------------|
| cell differentiation                              | 36           |   |     |    |       | 27         | 82        |           |                      |
| double-strand break repair                        | GO:0006302   | 3 | 309 | 65 | 61686 | 9.2137416  | 0.0043227 | 0.0207082 | SMCHD1,NBN,LIG4      |
| regulation of protein phosphorylation             | GO:0001932   | 3 | 309 | 66 | 61686 | 9.07413945 | 0.004512  | 0.021237  | PIK3CG,ARR3,EZH2     |
| response to unfolded protein                      | GO:0006986   | 3 | 309 | 67 | 61686 | 8.93870454 | 0.0047062 | 0.0220654 | THBS1,HSPA1B,CHAC1   |
| regulation of autophagy                           | GO:0010506   | 3 | 309 | 72 | 61686 | 8.31796117 | 0.0057526 | 0.0222751 | BCL2,ROCK1,PIK3R2    |
| negative regulation of cell death                 | GO:00060548  | 3 | 309 | 72 | 61686 | 8.31796117 | 0.0057526 | 0.0222751 | SOX4,HSPA1B,FGF2     |
| modulation of chemical synaptic transmission      | GO:00050804  | 3 | 309 | 72 | 61686 | 8.31796117 | 0.0057526 | 0.0222751 | STAU1,BDNF,WNT3A     |
| response to wounding                              | GO:0009611   | 3 | 309 | 73 | 61686 | 8.20401649 | 0.0059772 | 0.0228527 | SOX2,MAP1B,ADM       |
| fat cell differentiation                          | GO:00045444  | 3 | 309 | 68 | 61686 | 8.807253   | 0.0049054 | 0.0228665 | FOXO1,AKT2,OSBPL8    |
| hemopoiesis                                       | GO:00030097  | 3 | 309 | 68 | 61686 | 8.807253   | 0.0049054 | 0.0228665 | CD164,BCL2,WNT3A     |
| canonical Wnt signaling pathway                   | GO:00060070  | 3 | 309 | 68 | 61686 | 8.807253   | 0.0049054 | 0.0228665 | FZD6,LRP6,WNT3A      |
| regulation of actin cytoskeleton organization     | GO:00032956  | 3 | 309 | 74 | 61686 | 8.0931514  | 0.0062069 | 0.0235456 | TWF2,ROCK1,CRK       |
| keratinization                                    | GO:00031424  | 3 | 309 | 74 | 61686 | 8.0931514  | 0.0062069 | 0.0235456 | CDH3,KRTAP4-11,KRT6C |
| response to nutrient                              | GO:00007584  | 3 | 309 | 75 | 61686 | 7.98524272 | 0.0064419 | 0.0240604 | VCAM1,IGFBP2,ACSL4   |
| regulation of growth                              | GO:00040008  | 3 | 309 | 75 | 61686 | 7.98524272 | 0.0064419 | 0.0240604 | RACK1,BCL2,IGFBP2    |
| memory                                            | GO:00007613  | 3 | 309 | 76 | 61686 | 7.88017374 | 0.0066821 | 0.024881  | CRTC1,PLK2,BDNF      |
| regulation of mitotic cell cycle phase transition | GO:000901990 | 3 | 309 | 76 | 61686 | 7.88017374 | 0.0066821 | 0.024881  | CCNB1,PSMD12,PSMA2   |
| neural tube closure                               | GO:000018    | 3 | 309 | 77 | 61686 | 7.77783382 | 0.00692   | 0.02575   | FZD6,LRP6,ADM        |

|                                                                           |             |   |     |     |       |            |           |           |                       |
|---------------------------------------------------------------------------|-------------|---|-----|-----|-------|------------|-----------|-----------|-----------------------|
|                                                                           | 43          |   |     |     |       |            | 76        | 55        |                       |
| anaphase-promoting complex-dependent catabolic process                    | GO:0031145  | 3 | 309 | 79  | 61686 | 7.58092663 | 0.0074345 | 0.0273049 | CCNB1,PSMD12,PSMA2    |
| circadian rhythm                                                          | GO:0007623  | 3 | 309 | 83  | 61686 | 7.21558077 | 0.0085127 | 0.0304796 | SIRT1,EGFR,LGR4       |
| transport across blood-brain barrier                                      | GO:0150104  | 3 | 309 | 84  | 61686 | 7.129681   | 0.0087957 | 0.0312622 | SLC7A5,SLC2A1,SLC38A2 |
| BMP signaling pathway                                                     | GO:0030509  | 3 | 309 | 85  | 61686 | 7.0458024  | 0.0090843 | 0.0322405 | ACVR2B,GDF5,SMAD2     |
| liver development                                                         | GO:0001889  | 3 | 309 | 86  | 61686 | 6.96387446 | 0.0093783 | 0.0328512 | ARF6,KRAS,EGFR        |
| Wnt signaling pathway, planar cell polarity pathway                       | GO:0060071  | 3 | 309 | 87  | 61686 | 6.88382993 | 0.0096778 | 0.0338027 | FZD6,PSMD12,PSMA2     |
| nuclear-transcribed mRNA catabolic process, nonsense-mediated decay       | GO:0000184  | 3 | 309 | 95  | 61686 | 6.30413899 | 0.0122745 | 0.0352529 | RPS5,RPL7,RPSA        |
| Golgi organization                                                        | GO:0007030  | 3 | 309 | 97  | 61686 | 6.17415674 | 0.0129799 | 0.0369722 | UBXN2A,TJAP1,VMP1     |
| cellular calcium ion homeostasis                                          | GO:0006874  | 3 | 309 | 104 | 61686 | 5.7585885  | 0.0156285 | 0.039055  | CXCL12,BCL2,SLC10A7   |
| chromatin remodeling                                                      | GO:0006338  | 3 | 309 | 100 | 61686 | 5.98893204 | 0.0140807 | 0.0398734 | KDM5C,RB1,GATA3       |
| receptor-mediated endocytosis                                             | GO:0006898  | 3 | 309 | 110 | 61686 | 5.44448367 | 0.0181228 | 0.0445986 | PDLIM7,LDLR,EGFR      |
| glucose homeostasis                                                       | GO:00042593 | 3 | 309 | 112 | 61686 | 5.34726075 | 0.0190004 | 0.0465694 | SOX4,IRS1,AKT1        |
| adenylate cyclase-activating G protein-coupled receptor signaling pathway | GO:0007189  | 3 | 309 | 112 | 61686 | 5.34726075 | 0.0190004 | 0.0465694 | ADGRE5,LGR4,ADM       |
| positive regulation of DNA-binding transcription factor activity          | GO:00051091 | 3 | 309 | 113 | 61686 | 5.29993986 | 0.019448  | 0.0476181 | LRP6,AKT1,WNT3A       |

**Supplementary materials**

| <b>Supplementary Table ST4B: Significantly enriched KEGG pathways having at least 3 genes in a category (<a href="https://genecodis.genyo.es/">https://genecodis.genyo.es/</a>)</b> |                 |             |            |            |                |                     |                 |                 |                                                                                                                                                                                                                      |
|-------------------------------------------------------------------------------------------------------------------------------------------------------------------------------------|-----------------|-------------|------------|------------|----------------|---------------------|-----------------|-----------------|----------------------------------------------------------------------------------------------------------------------------------------------------------------------------------------------------------------------|
| description                                                                                                                                                                         | annotation_id   | genes_found | input_size | term_genes | genes_universe | relative_enrichment | pval            | pval_adj        | genes                                                                                                                                                                                                                |
| Pathways in cancer                                                                                                                                                                  | hsa05200        | 38          | 309        | 378        | 61686          | 20.0687317          | 2.09E-37        | 5.38E-35        | CDKN1A,CCNA2,CCNE2,CASP7,PIK3R3,FZD6,CXCR4,VEGFA,ELOC,SLC2A1,CXCL12,BCL2,ROCK1,RB1,RAF1,PTGS2,MAPK1,PIK3R2,PIK3R1,NFKBIA,MMP9,SMAD2,LRP6,KRAS,GNB1,ALK,FOXO1,FGF2,AKT2,AKT1,WNT3A,EGFR,E2F1,POLK,CRKL,CRK,EML4,FGF22 |
| Metabolic pathways                                                                                                                                                                  | hsa01100        | 27          | 309        | 553        | 61686          | 9.746905669         | 1.30E-18        | 9.79E-18        | SIRT1,ATP6V0E1,PLA2G4C,PIP5K1A,CA1,PTGS2,PIK3CG,PFAS,NDUFB10,IMPA1,GK,COX8C,AMD1,GCNT1,FUT1,ACSL4,EZH2,L2HGDH,CHAC1,DNMT1,CYP26A1,CYP2E1,ETNK2,HACD3,DMGDH,ADH1A,B3GAT1                                              |
| MicroRNAs in cancer                                                                                                                                                                 | hsa05206        | 26          | 309        | 124        | 61686          | 41.85812715         | 1.37E-34        | 1.76E-32        | SIRT1,CDKN1A,CCNE2,PIK3R3,VEGFA,THBS1,SOX4,BCL2,ROCK1,RAF1,PTGS2,MAPK1,PIK3R2,PIK3R1,MMP9,STMN1,KRAS,IRS1,EZH2,WNT3A,SLC45A3,EGFR,E2F1,DNMT1,CRKL,CRK                                                                |
| Human papillomavirus infection                                                                                                                                                      | hsa05165        | 22          | 309        | 187        | 61686          | 23.486008           | 1.31E-23        | 4.79E-22        | CDKN1A,CCNA2,CCNE2,ATP6V0E1,PIK3R3,FZD6,VEGFA,THBS1,RB1,RAF1,PTGS2,MAPK1,PIK3R2,PIK3R1,LFNG,KRAS,FOXO1,AKT2,AKT1,WNT3A,EGFR,E2F1                                                                                     |
| PI3K-Akt signaling pathway                                                                                                                                                          | hsa04151        | 22          | 309        | 229        | 61686          | 19.17853055         | 1.19E-21        | 1.91E-20        | CDKN1A,CCNE2,PIK3R3,VEGFA,THBS1,TEK,BDNF,BCL2,RAF1,MAPK1,PIK3R2,PIK3R1,PIK3CG,KRAS,IRS1,GNB1,FOXO3,FGF2,AKT2,AKT1,EGFR,FGF22                                                                                         |
| Gastric cancer                                                                                                                                                                      | hsa05226        | 21          | 309        | 96         | 61686          | 43.66929612         | 1.39E-28        | 1.19E-26        | CDKN1A,CCNE2,PIK3R3,FZD6,BCL2,RB1,RAF1,MAPK1,PIK3R2,PIK3R1,SMAD2,LRP6,KRAS,FGF2,AKT2,AKT1,WNT3A,EGFR,E2F1,POLK,FGF22                                                                                                 |
| Alzheimer disease                                                                                                                                                                   | hsa05010        | 21          | 309        | 162        | 61686          | 25.8781014          | 1.68E-23        | 5.38E-22        | CASP7,PIK3R3,FZD6,VDAC2,RAF1,PTGS2,PSMD12,PSMA2,MAPK1,PIK3R2,PIK3R1,NDUFB10,LRP6,KRAS,IRS1,GRIN2B,COX8C,AKT2,AKT1,WNT3A,RTN4                                                                                         |
| Human cytomegalovirus infection                                                                                                                                                     | hsa05163        | 21          | 309        | 165        | 61686          | 25.40759047         | 2.49E-23        | 6.41E-22        | CDKN1A,PIK3R3,CXCR4,VEGFA,CXCL12,ROCK1,RB1,RAF1,PTGS2,MAPK1,PIK3R2,PIK3R1,NFKBIA,KRAS,GNB1,AKT2,AKT1,EGFR,E2F1,CRKL,CRK                                                                                              |
| MAPK signaling pathway                                                                                                                                                              | hsa04010        | 21          | 309        | 201        | 61686          | 20.85697725         | 1.71E-21        | 2.59E-20        | PLA2G4C,VEGFA,TEK,BDNF,RASA1,RAF1,PTPN7,MAPK1,MAP3K3,STMN1,KRAS,IRAK1,HSPA1B,FGF2,AKT2,AKT1,EGFR,IRAK4,CRKL,CRK,FGF22                                                                                                |
| Cellular senescence                                                                                                                                                                 | hsa04218        | 20          | 309        | 111        | 61686          | 35.96956179         | 1.89E-25        | 1.21E-23        | SIRT1,CDKN1A,CCNB1,CCNA2,CCNE2,PIK3R3,VDAC2,RB1,RAF1,MAPK1,PIK3R2,PIK3R1,NBN,SMAD2,KRAS,FOXO3,FOXO1,AKT2,AKT1,E2F1                                                                                                   |
| <b>Ras signaling pathway</b>                                                                                                                                                        | <b>hsa04014</b> | <b>20</b>   | <b>309</b> | <b>159</b> | <b>61686</b>   | <b>25.11082616</b>  | <b>3.58E-22</b> | <b>6.57E-21</b> | <b>PLA2G4C,PIK3R3,VEGFA,TEK,BDNF,RASA1,RAF1,RAB5B,MAPK1,PIK3R2,PIK3R1,ARF6,KRAS,GRIN2B,GNB1,FGF2,AKT2,AKT1,EGFR,FGF22</b>                                                                                            |
| Human T-cell leukemia virus 1 infection                                                                                                                                             | hsa05166        | 20          | 309        | 162        | 61686          | 24.64581086         | 5.26E-22        | 9.01E-21        | CRTC1,CDKN1A,CCNA2,CCNE2,PIK3R3,VDAC2,SLC2A1,RB1,MAPK1,PIK3R2,PIK3R1,NFKBIA,MMP7,MAP3K3,SMAD2,KRAS,AKT2,AKT1,TLN2,E2F1                                                                                               |
| Breast cancer                                                                                                                                                                       | hsa05224        | 19          | 309        | 93         | 61686          | 40.78484184         | 2.32E-25        | 1.19E-23        | CDKN1A,PIK3R3,FZD6,RB1,RAF1,MAPK1,PIK3R2,PIK3R1,PGR,LRP6,KRAS,FGF2,AKT2,AKT1,WNT3A,EGFR,E2F1,POLK,FGF22                                                                                                              |
| Proteoglycans in cancer                                                                                                                                                             | hsa05205        | 19          | 309        | 146        | 61686          | 25.97938556         | 2.04E-21        | 2.92E-20        | CDKN1A,PIK3R3,FZD6,VEGFA,THBS1,ROCK1,RAF1,MAPK1,PIK3R2,PIK3R1,MMP9,SMAD2,KRAS,FGF2,AKT2,AKT1,WNT3A,EGFR,HBEGF                                                                                                        |
| Neurotrophin signaling pathway                                                                                                                                                      | hsa04722        | 18          | 309        | 87         | 61686          | 41.30297958         | 3.37E-24        | 1.44E-22        | PIK3R3,BDNF,BCL2,RAF1,MAPK1,PIK3R2,PIK3R1,NFKBIA,MAP3K3,KRAS,IRS1,IRAK1,FOXO3,AKT2,AKT1,IRAK4,CRKL,CRK                                                                                                               |
| Hepatocellular carcinoma                                                                                                                                                            | hsa05225        | 18          | 309        | 96         | 61686          | 37.43082524         | 2.30E-23        | 6.57E-22        | CDKN1A,PIK3R3,FZD6,RB1,RAF1,MAPK1,PIK3R2,PIK3R1,SMAD2,LRP6,KRAS,ARID2,AKT2,AKT1,WNT3A,EGFR,E2F1,POLK                                                                                                                 |
| Hepatitis B                                                                                                                                                                         | hsa05161        | 18          | 309        | 134        | 61686          | 26.81611361         | 1.30E-20        | 1.52E-19        | CDKN1A,CCNA2,CCNE2,PIK3R3,BCL2,RB1,RAF1,MAPK1,PIK3R2,PIK3R1,NFKBIA,MMP9,KRAS,IRAK1,AKT2,AKT1,E2F1,IRAK4                                                                                                              |
| Epstein-Barr virus infection                                                                                                                                                        | hsa05169        | 18          | 309        | 139        | 61686          | 25.8515052          | 2.57E-20        | 2.88E-19        | CDKN1A,CCNA2,CCNE2,PIK3R3,BCL2,RB1,PSMD12,PIK3R2,PIK3R1,OAS2,NFKBIA,IRAK1,AKT2,AKT1,E2F1,POLK,IRAK4,CR2                                                                                                              |
| Human immunodeficiency virus 1 infection                                                                                                                                            | hsa05170        | 18          | 309        | 141        | 61686          | 25.48481719         | 3.36E-20        | 3.59E-19        | CCNB1,PIK3R3,CXCR4,ELOC,BCL2,RAF1,MAPK1,PIK3R2,PIK3R1,NFKBIA,KRAS,IRAK1,GNB1,AKT2,AKT1,IRAK4,CRKL,CRK                                                                                                                |
| Rap1 signaling pathway                                                                                                                                                              | hsa04015        | 18          | 309        | 156        | 61686          | 23.034354           | 2.17E-19        | 1.80E-18        | PIK3R3,VEGFA,THBS1,TEK,RAF1,MAPK1,PIK3R2,PIK3R1,KRAS,GRIN2B,FGF2,AKT2,AKT1,TLN2,EGFR,CRKL,CRK,FGF22                                                                                                                  |
| Prostate cancer                                                                                                                                                                     | hsa05215        | 17          | 309        | 82         | 61686          | 41.38692872         | 6.10E-23        | 1.31E-21        | CDKN1A,CCNE2,PIK3R3,BCL2,RB1,RAF1,MAPK1,PIK3R2,PIK3R1,NFKBIA,MMP9,KRAS,FOXO1,AKT2,AKT1,EGFR,E2F1                                                                                                                     |
| <b>Chemokine signaling pathway</b>                                                                                                                                                  | <b>hsa04062</b> | <b>17</b>   | <b>309</b> | <b>124</b> | <b>61686</b>   | <b>27.36877545</b>  | <b>1.08E-19</b> | <b>9.89E-19</b> | <b>PIK3R3,CXCR4,CXCL12,ROCK1,RAF1,MAPK1,PIK3R2,PIK3R1,PIK3CG,NFKBIA,KRAS,GNB1,FOXO3,AKT2,AKT1,CRKL,CRK</b>                                                                                                           |

|                                                          |                 |           |            |            |              |                    |                 |                 |                                                                                                       |
|----------------------------------------------------------|-----------------|-----------|------------|------------|--------------|--------------------|-----------------|-----------------|-------------------------------------------------------------------------------------------------------|
| Kaposi sarcoma-associated herpesvirus infection          | hsa05167        | 17        | 309        | 137        | 61686        | 24.77173836        | 6.20E-19        | 4.83E-18        | CDKN1A,PIK3R3,VEGFA,RB1,RAF1,PTGS2,MAPK1,PIK3R2,PIK3R1,PIK3CG,NFKBIA,KRAS,GNB1,FGF2,AKT2,AKT1,E2F1    |
| Salmonella infection                                     | hsa05132        | 17        | 309        | 143        | 61686        | 23.73236472        | 1.31E-18        | 9.34E-18        | NCKAP1,EXOC5,ACTR2,CASP7,BCL2,RAF1,RAB5B,MAPK1,PIK3CG,NFKBIA,ARF6,KPNA1,IRAK1,ANXA2,AKT2,AKT1,IRAK4   |
| Regulation of actin cytoskeleton                         | hsa04810        | 17        | 309        | 143        | 61686        | 23.73236472        | 1.31E-18        | 9.34E-18        | NCKAP1,ACTR2,PIK3R3,PIP5K1A,CXCR4,CXCL12,ROCK1,RAF1,MAPK1,PIK3R2,PIK3R1,KRAS,FGF2,EGFR,CRKL,CRK,FGF22 |
| Shigellosis                                              | hsa05131        | 17        | 309        | 158        | 61686        | 21.47929212        | 7.35E-18        | 4.97E-17        | ACTR2,PIK3R3,BCL2,ROCK1,MAPK1,PIK3R2,PIK3R1,NFKBIA,ARF6,FOXO3,FOXO1,AKT2,AKT1,TLN2,EGFR,CRKL,CRK      |
| Non-small cell lung cancer                               | hsa05223        | 16        | 309        | 63         | 61686        | 50.69995377        | 3.15E-23        | 7.36E-22        | CDKN1A,PIK3R3,RB1,RAF1,MAPK1,PIK3R2,PIK3R1,KRAS,ALK,FOXO3,AKT2,AKT1,EGFR,E2F1,POLK,EML4               |
| <b>FoxO signaling pathway</b>                            | <b>hsa04068</b> | <b>16</b> | <b>309</b> | <b>100</b> | <b>61686</b> | <b>31.94097087</b> | <b>9.80E-20</b> | <b>9.33E-19</b> | <b>SIRT1,CDKN1A,PLK2,CCNB1,PIK3R3,RAF1,MAPK1,PIK3R2,PIK3R1,KRAS,IRS1,FOXO3,FOXO1,AKT2,AKT1,EGFR</b>   |
| Hepatitis C                                              | hsa05160        | 16        | 309        | 108        | 61686        | 29.57497303        | 3.58E-19        | 2.87E-18        | CDKN1A,PIK3R3,RB1,RAF1,MAPK1,PIK3R2,PIK3R1,OAS2,NFKBIA,OCLN,LDLR,KRAS,AKT2,AKT1,EGFR,E2F1             |
| Focal adhesion                                           | hsa04510        | 16        | 309        | 135        | 61686        | 23.65997843        | 1.44E-17        | 9.22E-17        | PIK3R3,PIP5K1A,VEGFA,THBS1,BCL2,ROCK1,RAF1,MAPK1,PIK3R2,PIK3R1,AKT2,AKT1,TLN2,EGFR,CRKL,CRK           |
| Pathways of neurodegeneration - multiple diseases        | hsa05022        | 16        | 309        | 208        | 61686        | 15.356236          | 1.46E-14        | 6.57E-14        | CASP7,FZD6,VDAC2,BDNF,BCL2,RAF1,PTGS2,PSMD12,PSMA2,MAPK1,NDUFB10,LRP6,KRAS,GRIN2B,COX8C,WNT3A         |
| Melanoma                                                 | hsa05218        | 15        | 309        | 54         | 61686        | 55.45307443        | 1.62E-22        | 3.20E-21        | CDKN1A,PIK3R3,RB1,RAF1,MAPK1,PIK3R2,PIK3R1,KRAS,FGF2,AKT2,AKT1,EGFR,E2F1,POLK,FGF22                   |
| Pancreatic cancer                                        | hsa05212        | 15        | 309        | 67         | 61686        | 44.69352268        | 6.10E-21        | 7.83E-20        | CDKN1A,PIK3R3,VEGFA,RB1,RAF1,MAPK1,PIK3R2,PIK3R1,SMAD2,KRAS,AKT2,AKT1,EGFR,E2F1,POLK                  |
| Chronic myeloid leukemia                                 | hsa05220        | 15        | 309        | 67         | 61686        | 44.69352268        | 6.10E-21        | 7.83E-20        | CDKN1A,PIK3R3,RB1,RAF1,MAPK1,PIK3R2,PIK3R1,NFKBIA,KRAS,AKT2,AKT1,E2F1,POLK,CRKL,CRK                   |
| Signaling pathways regulating pluripotency of stem cells | hsa04550        | 15        | 309        | 69         | 61686        | 43.39805825        | 9.90E-21        | 1.21E-19        | ACVR2B,PIK3R3,FZD6,SOX2,RAF1,MAPK1,PIK3R2,PIK3R1,SMAD2,LIFR,KRAS,FGF2,AKT2,AKT1,WNT3A                 |
| Endocrine resistance                                     | hsa01522        | 15        | 309        | 78         | 61686        | 38.39058999        | 7.33E-20        | 7.25E-19        | CDKN1A,PIK3R3,BCL2,RB1,RAF1,MAPK1,PIK3R2,PIK3R1,MMP9,KRAS,AKT2,AKT1,EGFR,E2F1,HBEGF                   |
| Estrogen signaling pathway                               | hsa04915        | 15        | 309        | 80         | 61686        | 37.43082524        | 1.10E-19        | 9.78E-19        | PIK3R3,BCL2,RAF1,MAPK1,PIK3R2,PIK3R1,PGR,MMP9,KRAS,KCNJ9,HSPA1B,AKT2,AKT1,EGFR,HBEGF                  |
| Relaxin signaling pathway                                | hsa04926        | 15        | 309        | 83         | 61686        | 36.07790385        | 2.00E-19        | 1.71E-18        | PIK3R3,VEGFA,RAF1,MAPK1,PIK3R2,PIK3R1,NFKBIA,MMP13,MMP9,SMAD2,KRAS,GNB1,AKT2,AKT1,EGFR                |
| Yersinia infection                                       | hsa05135        | 15        | 309        | 109        | 61686        | 27.47216532        | 1.48E-17        | 9.30E-17        | ACTR2,PIK3R3,PIP5K1A,ROCK1,MAPK1,PIK3R2,PIK3R1,NFKBIA,ARF6,IRAK1,AKT2,AKT1,IRAK4,CRKL,CRK             |
| Renal cell carcinoma                                     | hsa05211        | 14        | 309        | 60         | 61686        | 46.58058252        | 6.57E-20        | 6.75E-19        | CDKN1A,PIK3R3,VEGFA,ELOC,SLC2A1,RAF1,MAPK1,PIK3R2,PIK3R1,KRAS,AKT2,AKT1,CRKL,CRK                      |
| Glioma                                                   | hsa05214        | 13        | 309        | 57         | 61686        | 45.52989269        | 1.95E-18        | 1.35E-17        | CDKN1A,PIK3R3,RB1,RAF1,MAPK1,PIK3R2,PIK3R1,KRAS,AKT2,AKT1,EGFR,E2F1,POLK                              |
| Fc gamma R-mediated phagocytosis                         | hsa04666        | 13        | 309        | 66         | 61686        | 39.32127096        | 1.56E-17        | 9.57E-17        | ACTR2,PLA2G4C,PIK3R3,PIP5K1A,RAF1,MAPK1,PIK3R2,PIK3R1,ARF6,AKT2,AKT1,CRKL,CRK                         |
| EGFR tyrosine kinase inhibitor resistance                | hsa01521        | 13        | 309        | 69         | 61686        | 37.61165049        | 2.92E-17        | 1.74E-16        | PIK3R3,VEGFA,BCL2,RAF1,MAPK1,PIK3R2,PIK3R1,KRAS,FOXO3,FGF2,AKT2,AKT1,EGFR                             |
| ErbB signaling pathway                                   | hsa04012        | 13        | 309        | 70         | 61686        | 37.07434119        | 3.57E-17        | 2.08E-16        | CDKN1A,PIK3R3,RAF1,MAPK1,PIK3R2,PIK3R1,KRAS,AKT2,AKT1,EGFR,HBEGF,CRKL,CRK                             |
| Small cell lung cancer                                   | hsa05222        | 13        | 309        | 71         | 61686        | 36.55216737        | 4.35E-17        | 2.48E-16        | CDKN1A,CCNE2,PIK3R3,BCL2,RB1,PTGS2,PIK3R2,PIK3R1,NFKBIA,AKT2,AKT1,E2F1,POLK                           |
| Colorectal cancer                                        | hsa05210        | 13        | 309        | 73         | 61686        | 35.55073813        | 6.40E-17        | 3.50E-16        | CDKN1A,PIK3R3,BCL2,RAF1,MAPK1,PIK3R2,PIK3R1,SMAD2,KRAS,AKT2,AKT1,EGFR,POLK                            |

|                                                        |                 |           |            |           |              |                    |                 |                 |                                                                                 |
|--------------------------------------------------------|-----------------|-----------|------------|-----------|--------------|--------------------|-----------------|-----------------|---------------------------------------------------------------------------------|
| PD-L1 expression and PD-1 checkpoint pathway in cancer | hsa05235        | 13        | 309        | 74        | 61686        | 35.07032275        | 7.73E-17        | 4.14E-16        | PIK3R3,RAF1,MAPK1,PIK3R2,PIK3R1,NFKBIA,MAP3K3,KRAS,ALK,AKT2,AKT1,EGFR,EML4      |
| HIF-1 signaling pathway                                | hsa04066        | 13        | 309        | 79        | 61686        | 32.85068207        | 1.91E-16        | 9.99E-16        | CDKN1A,PIK3R3,VEGFA,TEK,ELOC,SLC2A1,BCL2,MAPK1,PIK3R2,PIK3R1,AKT2,AKT1,EGFR     |
| mTOR signaling pathway                                 | hsa04150        | 13        | 309        | 80        | 61686        | 32.44004854        | 2.26E-16        | 1.16E-15        | PIK3R3,FZD6,SLC7A5,RAF1,MAPK1,PIK3R2,PIK3R1,LRP6,KRAS,IRS1,AKT2,AKT1,WNT3A      |
| Phospholipase D signaling pathway                      | hsa04072        | 13        | 309        | 107       | 61686        | 24.2542419         | 1.15E-14        | 5.30E-14        | PLA2G4C,PIK3R3,PIP5K1A,RAF1,MAPK1,PIK3R2,PIK3R1,PIK3CG,ARF6,KRAS,AKT2,AKT1,EGFR |
| Measles                                                | hsa05162        | 13        | 309        | 111       | 61686        | 23.38021517        | 1.88E-14        | 8.19E-14        | RACK1,CCNE2,PIK3R3,BCL2,PIK3R2,PIK3R1,OAS2,NFKBIA,IRAK1,HSPA1B,AKT2,AKT1,IRAK4  |
| Coronavirus disease - COVID-19                         | hsa05171        | 13        | 309        | 113       | 61686        | 22.96640605        | 2.38E-14        | 9.87E-14        | PIK3R3,RPS5,RPL7,MAPK1,PIK3R2,PIK3R1,OAS2,NFKBIA,RPSA,IRAK1,EGFR,HBEGF,IRAK4    |
| Endometrial cancer                                     | hsa05213        | 12        | 309        | 48        | 61686        | 49.90776699        | 1.19E-17        | 7.87E-17        | CDKN1A,PIK3R3,RAF1,MAPK1,PIK3R2,PIK3R1,KRAS,FOXO3,AKT2,AKT1,EGFR,POLK           |
| AGE-RAGE signaling pathway in diabetic complications   | hsa04933        | 12        | 309        | 81        | 61686        | 29.57497303        | 1.05E-14        | 4.89E-14        | PIK3R3,VEGFA,VCAM1,BCL2,MAPK1,PIK3R2,PIK3R1,SMAD2,KRAS,FOXO1,AKT2,AKT1          |
| Axon guidance                                          | hsa04360        | 12        | 309        | 85        | 61686        | 28.18320959        | 1.91E-14        | 8.19E-14        | PIK3R3,CXCR4,CXCL12,ROCK1,RGS3,RASA1,RAF1,MAPK1,PIK3R2,PIK3R1,KRAS,EPHA4        |
| <b>Insulin signaling pathway</b>                       | <b>hsa04910</b> | <b>12</b> | <b>309</b> | <b>86</b> | <b>61686</b> | <b>27.85549786</b> | <b>2.21E-14</b> | <b>9.33E-14</b> | <b>PIK3R3,RAF1,MAPK1,PIK3R2,PIK3R1,KRAS,IRS1,FOXO1,AKT2,AKT1,CRKL,CRK</b>       |
| cAMP signaling pathway                                 | hsa04024        | 12        | 309        | 143       | 61686        | 16.75225745        | 1.07E-11        | 3.39E-11        | CFTR,PIK3R3,BDNF,ROCK1,RAF1,MAPK1,PIK3R2,PIK3R1,NFKBIA,GRIN2B,AKT2,AKT1         |
| Bladder cancer                                         | hsa05219        | 11        | 309        | 38        | 61686        | 57.78794073        | 4.45E-17        | 2.48E-16        | CDKN1A,VEGFA,THBS1,RB1,RAF1,MAPK1,MMP9,KRAS,EGFR,E2F1,HBEGF                     |
| VEGF signaling pathway                                 | hsa04370        | 11        | 309        | 45        | 61686        | 48.7987055         | 3.64E-16        | 1.83E-15        | PLA2G4C,PIK3R3,VEGFA,RAF1,PTGS2,MAPK1,PIK3R2,PIK3R1,KRAS,AKT2,AKT1              |
| Longevity regulating pathway - multiple species        | hsa04213        | 11        | 309        | 47        | 61686        | 46.72216484        | 6.18E-16        | 3.06E-15        | SIRT1,PIK3R3,PIK3R2,PIK3R1,KRAS,IRS1,HSPA1B,FOXO3,FOXO1,AKT2,AKT1               |
| Central carbon metabolism in cancer                    | hsa05230        | 11        | 309        | 52        | 61686        | 42.22964899        | 2.10E-15        | 1.02E-14        | PIK3R3,SLC7A5,SLC2A1,RAF1,MAPK1,PIK3R2,PIK3R1,KRAS,AKT2,AKT1,EGFR               |
| Progesterone-mediated oocyte maturation                | hsa04914        | 11        | 309        | 56        | 61686        | 39.21324549        | 5.08E-15        | 2.42E-14        | CCNB1,CCNA2,PIK3R3,RAF1,MAPK1,PIK3R2,PIK3R1,PGR,KRAS,AKT2,AKT1                  |
| Choline metabolism in cancer                           | hsa05231        | 11        | 309        | 62        | 61686        | 35.41841528        | 1.69E-14        | 7.48E-14        | PLA2G4C,PIK3R3,PIP5K1A,RAF1,MAPK1,PIK3R2,PIK3R1,KRAS,AKT2,AKT1,EGFR             |
| AMPK signaling pathway                                 | hsa04152        | 11        | 309        | 80        | 61686        | 27.44927184        | 3.21E-13        | 1.31E-12        | SIRT1,CFTR,CCNA2,PIK3R3,PIK3R2,PIK3R1,IRS1,FOXO3,FOXO1,AKT2,AKT1                |
| Growth hormone synthesis, secretion and action         | hsa04935        | 11        | 309        | 86        | 61686        | 25.53420637        | 7.31E-13        | 2.89E-12        | PIK3R3,RAF1,MAPK1,PIK3R2,PIK3R1,KRAS,IRS1,AKT2,AKT1,CRKL,CRK                    |
| TNF signaling pathway                                  | hsa04668        | 11        | 309        | 96        | 61686        | 22.8743932         | 2.52E-12        | 9.52E-12        | CASP7,PIK3R3,VCAM1,PTGS2,MAPK1,PIK3R2,PIK3R1,NFKBIA,MMP9,AKT2,AKT1              |
| Prion disease                                          | hsa05020        | 11        | 309        | 97        | 61686        | 22.63857472        | 2.83E-12        | 1.04E-11        | PIK3R3,VDAC2,PSMD12,PSMA2,MAPK1,PIK3R2,PIK3R1,NDUFB10,HSPA1B,GRIN2B,COX8C       |
| Autophagy - animal                                     | hsa04140        | 11        | 309        | 98        | 61686        | 22.40756885        | 3.17E-12        | 1.15E-11        | PIK3R3,BCL2,RAF1,MAPK1,PIK3R2,PIK3R1,KRAS,IRS1,AKT2,AKT1,VMP1                   |
| Fluid shear stress and atherosclerosis                 | hsa05418        | 11        | 309        | 100       | 61686        | 21.95941748        | 3.98E-12        | 1.38E-11        | ACVR2B,PIK3R3,VEGFA,VCAM1,BCL2,PIK3R2,PIK3R1,MMP9,MEF2A,AKT2,AKT1               |

|                                                     |          |    |     |     |       |             |          |          |                                                                      |
|-----------------------------------------------------|----------|----|-----|-----|-------|-------------|----------|----------|----------------------------------------------------------------------|
| Apoptosis                                           | hsa04210 | 11 | 309 | 100 | 61686 | 21.95941748 | 3.98E-12 | 1.38E-11 | CASP7,PIK3R3,BCL2,RAF1,MAPK1,PIK3R2,PIK3R1,NFKBIA,KRAS,AKT2,AKT1     |
| Influenza A                                         | hsa05164 | 11 | 309 | 115 | 61686 | 19.09514563 | 1.87E-11 | 5.72E-11 | PIK3R3,RAF1,MAPK1,PIK3R2,PIK3R1,OAS2,NFKBIA,KPNA1,AKT2,AKT1,IRAK4    |
| Viral carcinogenesis                                | hsa05203 | 11 | 309 | 124 | 61686 | 17.70920764 | 4.27E-11 | 1.23E-10 | CDKN1A,CCNA2,CCNE2,PIK3R3,RB1,MAPK1,PIK3R2,PIK3R1,NFKBIA,KRAS,GTF2H1 |
| B cell receptor signaling pathway                   | hsa04662 | 10 | 309 | 59  | 61686 | 33.83577423 | 4.35E-13 | 1.75E-12 | PIK3R3,RAF1,MAPK1,PIK3R2,PIK3R1,NFKBIA,KRAS,AKT2,AKT1,CR2            |
| Non-alcoholic fatty liver disease                   | hsa04932 | 10 | 309 | 67  | 61686 | 29.79568179 | 1.66E-12 | 6.45E-12 | CASP7,PIK3R3,PIK3R2,PIK3R1,NDUFB10,IRS1,COX8C,AKT2,AKT1,CYP2E1       |
| Longevity regulating pathway                        | hsa04211 | 10 | 309 | 69  | 61686 | 28.93203883 | 2.25E-12 | 8.64E-12 | SIRT1,PIK3R3,PIK3R2,PIK3R1,KRAS,IRS1,FOXO3,FOXO1,AKT2,AKT1           |
| Sphingolipid signaling pathway                      | hsa04071 | 10 | 309 | 70  | 61686 | 28.51872399 | 2.62E-12 | 9.74E-12 | PIK3R3,BCL2,ROCK1,RAF1,MAPK1,PIK3R2,PIK3R1,KRAS,AKT2,AKT1            |
| Cholinergic synapse                                 | hsa04725 | 10 | 309 | 75  | 61686 | 26.61747573 | 5.35E-12 | 1.83E-11 | PIK3R3,BCL2,MAPK1,PIK3R2,PIK3R1,PIK3CG,KRAS,GNB1,AKT2,AKT1           |
| Toxoplasmosis                                       | hsa05145 | 10 | 309 | 77  | 61686 | 25.92611272 | 7.01E-12 | 2.34E-11 | BCL2,MAPK1,PIK3CG,NFKBIA,LDLR,IRAK1,HSPA1B,AKT2,AKT1,IRAK4           |
| Thyroid hormone signaling pathway                   | hsa04919 | 10 | 309 | 78  | 61686 | 25.59372666 | 8.01E-12 | 2.61E-11 | PIK3R3,SLC2A1,RAF1,MAPK1,PIK3R2,PIK3R1,KRAS,FOXO1,AKT2,AKT1          |
| Parathyroid hormone synthesis, secretion and action | hsa04928 | 10 | 309 | 78  | 61686 | 25.59372666 | 8.01E-12 | 2.61E-11 | CDKN1A,BCL2,RAF1,MAPK1,MMP13,MEF2A,LRP6,GATA3,EGFR,HBEGF             |
| Chagas disease                                      | hsa05142 | 10 | 309 | 80  | 61686 | 24.9538835  | 1.04E-11 | 3.34E-11 | PIK3R3,MAPK1,PIK3R2,PIK3R1,NFKBIA,SMAD2,IRAK1,AKT2,AKT1,IRAK4        |
| C-type lectin receptor signaling pathway            | hsa04625 | 10 | 309 | 83  | 61686 | 24.0519359  | 1.51E-11 | 4.69E-11 | PIK3R3,RAF1,PTGS2,MAPK1,PIK3R2,PIK3R1,NFKBIA,KRAS,AKT2,AKT1          |
| Endocytosis                                         | hsa04144 | 10 | 309 | 88  | 61686 | 22.68534863 | 2.75E-11 | 8.12E-11 | ACTR2,USP8,PIP5K1A,CXCR4,RAB5B,SMAD2,ARF6,LDLR,HSPA1B,EGFR           |
| Platelet activation                                 | hsa04611 | 10 | 309 | 91  | 61686 | 21.93748    | 3.86E-11 | 1.13E-10 | PLA2G4C,PIK3R3,ROCK1,MAPK1,PIK3R2,PIK3R1,PIK3CG,AKT2,AKT1,TLN2       |
| Oxytocin signaling pathway                          | hsa04921 | 10 | 309 | 92  | 61686 | 21.69902913 | 4.31E-11 | 1.23E-10 | CDKN1A,PLA2G4C,ROCK1,RAF1,PTGS2,MAPK1,PIK3CG,KRAS,KCNJ9,EGFR         |
| Cushing syndrome                                    | hsa04934 | 10 | 309 | 101 | 61686 | 19.76545227 | 1.10E-10 | 3.02E-10 | CDKN1A,CCNE2,USP8,FZD6,RB1,MAPK1,LDLR,WNT3A,EGFR,E2F1                |
| JAK-STAT signaling pathway                          | hsa04630 | 10 | 309 | 106 | 61686 | 18.83311962 | 1.79E-10 | 4.80E-10 | CDKN1A,PIK3R3,BCL2,RAF1,PIK3R2,PIK3R1,LIFR,AKT2,AKT1,EGFR            |
| Pathogenic Escherichia coli infection               | hsa05130 | 10 | 309 | 110 | 61686 | 18.14827891 | 2.59E-10 | 6.87E-10 | NCKAP1,ACTR2,CASP7,ROCK1,MAPK1,NFKBIA,OCLN,ARF6,IRAK1,IRAK4          |
| Herpes simplex virus 1 infection                    | hsa05168 | 10 | 309 | 121 | 61686 | 16.49843537 | 6.66E-10 | 1.71E-09 | PIK3R3,BCL2,PIK3R2,PIK3R1,OAS2,NFKBIA,IRAK1,AKT2,AKT1,IRAK4          |
| GnRH secretion                                      | hsa04929 | 9  | 309 | 50  | 61686 | 35.93359223 | 3.70E-12 | 1.32E-11 | PIK3R3,RAF1,MAPK1,PIK3R2,PIK3R1,KRAS,KCNJ9,AKT2,AKT1                 |
| Fc epsilon RI signaling pathway                     | hsa04664 | 9  | 309 | 52  | 61686 | 34.55153099 | 5.38E-12 | 1.82E-11 | PLA2G4C,PIK3R3,RAF1,MAPK1,PIK3R2,PIK3R1,KRAS,AKT2,AKT1               |
| Prolactin signaling pathway                         | hsa04917 | 9  | 309 | 56  | 61686 | 32.08356449 | 1.09E-11 | 3.41E-11 | PIK3R3,RAF1,MAPK1,PIK3R2,PIK3R1,KRAS,FOXO3,AKT2,AKT1                 |
| Acute myeloid leukemia                              | hsa05221 | 9  | 309 | 61  | 61686 | 29.45376413 | 2.44E-11 | 7.29E-11 | CCNA2,PIK3R3,RAF1,MAPK1,PIK3R2,PIK3R1,KRAS,AKT2,AKT1                 |
| Insulin resistance                                  | hsa04931 | 9  | 309 | 69  | 61686 | 26.03883495 | 7.70E-11 | 2.17E-10 | PIK3R3,SLC2A1,PIK3R2,PIK3R1,NFKBIA,IRS1,FOXO1,AKT2,AKT1              |



|                                           |          |   |     |     |       |             |          |          |                                                          |
|-------------------------------------------|----------|---|-----|-----|-------|-------------|----------|----------|----------------------------------------------------------|
| Leukocyte transendothelial migration      | hsa04670 | 9 | 309 | 71  | 61686 | 25.30534664 | 1.00E-10 | 2.77E-10 | PIK3R3,CXCR4,VCAM1,CXCL12,ROCK1,PIK3R2,PIK3R1,OCLN,MMP9  |
| Spinocerebellar ataxia                    | hsa05017 | 9 | 309 | 75  | 61686 | 23.95572816 | 1.66E-10 | 4.49E-10 | PIK3R3,VDAC2,PSMD12,PSMA2,PIK3R2,PIK3R1,GRIN2B,AKT2,AKT1 |
| Toll-like receptor signaling pathway      | hsa04620 | 9 | 309 | 79  | 61686 | 22.74277989 | 2.68E-10 | 7.02E-10 | PIK3R3,MAPK1,PIK3R2,PIK3R1,NFKBIA,IRAK1,AKT2,AKT1,IRAK4  |
| T cell receptor signaling pathway         | hsa04660 | 9 | 309 | 84  | 61686 | 21.389043   | 4.68E-10 | 1.22E-09 | PIK3R3,RAF1,MAPK1,PIK3R2,PIK3R1,NFKBIA,KRAS,AKT2,AKT1    |
| Apelin signaling pathway                  | hsa04371 | 9 | 309 | 94  | 61686 | 19.11361289 | 1.29E-09 | 3.29E-09 | RAF1,MAPK1,PIK3CG,MEF2A,SMAD2,KRAS,GNB1,AKT2,AKT1        |
| cGMP-PKG signaling pathway                | hsa04022 | 9 | 309 | 112 | 61686 | 16.04178225 | 6.18E-09 | 1.51E-08 | VDAC2,ROCK1,RAF1,MAPK1,PIK3CG,MEF2A,IRS1,AKT2,AKT1       |
| Platinum drug resistance                  | hsa01524 | 8 | 309 | 47  | 61686 | 33.97975625 | 9.61E-11 | 2.68E-10 | CDKN1A,PIK3R3,BCL2,MAPK1,PIK3R2,PIK3R1,AKT2,AKT1         |
| Natural killer cell mediated cytotoxicity | hsa04650 | 8 | 309 | 76  | 61686 | 21.01379663 | 5.08E-09 | 1.27E-08 | PIK3R3,RAF1,MAPK1,PIK3R2,PIK3R1,KRAS,KIR3DL2,KIR3DL1     |
| Cell cycle                                | hsa04110 | 8 | 309 | 77  | 61686 | 20.74089018 | 5.65E-09 | 1.40E-08 | CDKN1A,STAG1,CCNB1,CCNA2,CCNE2,RB1,SMAD2,E2F1            |
| Neutrophil extracellular trap formation   | hsa04613 | 8 | 309 | 85  | 61686 | 18.7888064  | 1.25E-08 | 3.02E-08 | PIK3R3,VDAC2,RAF1,MAPK1,PIK3R2,PIK3R1,AKT2,AKT1          |
| Transcriptional misregulation in cancer   | hsa05202 | 8 | 309 | 112 | 61686 | 14.259362   | 1.10E-07 | 2.56E-07 | CDKN1A,CCNA2,TAF15,MMP9,HOXA9,FOXO1,SLC45A3,POLK         |
| Tuberculosis                              | hsa05152 | 8 | 309 | 119 | 61686 | 13.420576   | 1.75E-07 | 4.03E-07 | BCL2,RAF1,RAB5B,MAPK1,IRAK1,AKT2,AKT1,IRAK4              |
| Aldosterone-regulated sodium reabsorption | hsa04960 | 7 | 309 | 24  | 61686 | 58.22572816 | 2.38E-11 | 7.19E-11 | PIK3R3,MAPK1,PIK3R2,PIK3R1,KRAS,KCNJ1,IRS1               |
| Regulation of lipolysis in adipocytes     | hsa04923 | 7 | 309 | 47  | 61686 | 29.73228672 | 3.92E-09 | 9.87E-09 | PIK3R3,PTGS2,PIK3R2,PIK3R1,IRS1,AKT2,AKT1                |
| GnRH signaling pathway                    | hsa04912 | 7 | 309 | 65  | 61686 | 21.4987304  | 4.01E-08 | 9.64E-08 | PLA2G4C,RAF1,MAPK1,MAP3K3,KRAS,EGFR,HBEGF                |
| Serotonergic synapse                      | hsa04726 | 7 | 309 | 71  | 61686 | 19.68193628 | 7.47E-08 | 1.76E-07 | PLA2G4C,RAF1,PTGS2,MAPK1,KRAS,KCNJ9,GNB1                 |
| NF-kappa B signaling pathway              | hsa04064 | 7 | 309 | 86  | 61686 | 16.24904042 | 2.83E-07 | 6.38E-07 | VCAM1,CXCL12,BCL2,PTGS2,NFKBIA,IRAK1,IRAK4               |
| Huntington disease                        | hsa05016 | 7 | 309 | 92  | 61686 | 15.18932039 | 4.50E-07 | 9.89E-07 | VDAC2,BDNF,PSMD12,PSMA2,NDUFB10,GRIN2B,COX8C             |
| Osteoclast differentiation                | hsa04380 | 7 | 309 | 100 | 61686 | 13.97417476 | 7.95E-07 | 1.73E-06 | PIK3R3,MAPK1,PIK3R2,PIK3R1,NFKBIA,AKT2,AKT1              |
| Amyotrophic lateral sclerosis             | hsa05014 | 7 | 309 | 122 | 61686 | 11.4542416  | 3.03E-06 | 6.38E-06 | NUP50,BCL2,PSMD12,PSMA2,NDUFB10,GRIN2B,COX8C             |
| Bacterial invasion of epithelial cells    | hsa05100 | 6 | 309 | 47  | 61686 | 25.48481719 | 1.36E-07 | 3.15E-07 | ACTR2,PIK3R3,PIK3R2,PIK3R1,CRKL,CRK                      |
| Adipocytokine signaling pathway           | hsa04920 | 6 | 309 | 51  | 61686 | 23.486008   | 2.24E-07 | 5.10E-07 | SLC2A1,NFKBIA,IRS1,AKT2,ACSL4,AKT1                       |
| TGF-beta signaling pathway                | hsa04350 | 6 | 309 | 54  | 61686 | 22.18122977 | 3.18E-07 | 7.10E-07 | ACVR2B,GDF5,THBS1,ROCK1,MAPK1,SMAD2                      |
| Cell adhesion molecules                   | hsa04514 | 6 | 309 | 56  | 61686 | 21.389043   | 3.96E-07 | 8.77E-07 | CADM1,CD226,CDH3,CNTNAP1,VCAM1,OCLN                      |

|                                             |          |   |     |     |       |             |          |             |                                        |
|---------------------------------------------|----------|---|-----|-----|-------|-------------|----------|-------------|----------------------------------------|
| Alcoholism                                  | hsa05034 | 6 | 309 | 67  | 61686 | 17.87740907 | 1.16E-06 | 2.49E-06    | BDNF,RAF1,MAPK1,KRAS,GRIN2B,GNB1       |
| NOD-like receptor signaling pathway         | hsa04621 | 6 | 309 | 113 | 61686 | 10.59987971 | 2.43E-05 | 4.72E-05    | VDAC2,BCL2,MAPK1,OAS2,NFKBIA,IRAK4     |
| Cytokine-cytokine receptor interaction      | hsa04060 | 6 | 309 | 143 | 61686 | 8.376128726 | 9.04E-05 | 0.000158104 | ACVR2B,GDF5,CXCR4,CXCL12,TNFRSF17,LIFR |
| Calcium signaling pathway                   | hsa04020 | 6 | 309 | 148 | 61686 | 8.093151404 | 0.000109 | 0.000189702 | CXCR4,VEGFA,VDAC2,FGF2,EGFR,FGF22      |
| Carbohydrate digestion and absorption       | hsa04973 | 5 | 309 | 21  | 61686 | 47.53120666 | 5.82E-08 | 1.38E-07    | PIK3R3,PIK3R2,PIK3R1,AKT2,AKT1         |
| Phosphatidylinositol signaling system       | hsa04070 | 5 | 309 | 36  | 61686 | 27.72653722 | 1.01E-06 | 2.19E-06    | PIK3R3,PIP5K1A,PIK3R2,PIK3R1,IMPA1     |
| Type II diabetes mellitus                   | hsa04930 | 5 | 309 | 39  | 61686 | 25.59372666 | 1.53E-06 | 3.25E-06    | PIK3R3,MAPK1,PIK3R2,PIK3R1,IRS1        |
| Glucagon signaling pathway                  | hsa04922 | 5 | 309 | 52  | 61686 | 19.195295   | 6.54E-06 | 1.37E-05    | SIRT1,SLC2A1,FOXO1,AKT2,AKT1           |
| p53 signaling pathway                       | hsa04115 | 5 | 309 | 54  | 61686 | 18.48435814 | 7.90E-06 | 1.62E-05    | CDKN1A,CCNB1,CCNE2,THBS1,BCL2          |
| Melanogenesis                               | hsa04916 | 5 | 309 | 54  | 61686 | 18.48435814 | 7.90E-06 | 1.62E-05    | FZD6,RAF1,MAPK1,KRAS,WNT3A             |
| Leishmaniasis                               | hsa05140 | 5 | 309 | 58  | 61686 | 17.20957482 | 1.13E-05 | 2.26E-05    | PTGS2,MAPK1,NFKBIA,IRAK1,IRAK4         |
| Protein processing in endoplasmic reticulum | hsa04141 | 5 | 309 | 58  | 61686 | 17.20957482 | 1.13E-05 | 2.26E-05    | SSR3,BCL2,HSPA1B,UBXN2A,SEC61A1        |
| Retrograde endocannabinoid signaling        | hsa04723 | 5 | 309 | 60  | 61686 | 16.63592233 | 1.33E-05 | 2.65E-05    | PTGS2,MAPK1,NDUFB10,KCNJ9,GNB1         |
| Wnt signaling pathway                       | hsa04310 | 5 | 309 | 69  | 61686 | 14.46601942 | 2.64E-05 | 5.06E-05    | FZD6,MMP7,LRP6,WNT3A,LGR4              |
| IL-17 signaling pathway                     | hsa04657 | 5 | 309 | 69  | 61686 | 14.46601942 | 2.64E-05 | 5.06E-05    | PTGS2,MAPK1,NFKBIA,MMP13,MMP9          |
| Glutamatergic synapse                       | hsa04724 | 5 | 309 | 70  | 61686 | 14.259362   | 2.83E-05 | 5.39E-05    | PLA2G4C,MAPK1,GRIN2B,GNB1,SLC38A2      |
| Adrenergic signaling in cardiomyocytes      | hsa04261 | 5 | 309 | 72  | 61686 | 13.86326861 | 3.25E-05 | 6.13E-05    | BCL2,MAPK1,PIK3CG,AKT2,AKT1            |
| Dopaminergic synapse                        | hsa04728 | 5 | 309 | 73  | 61686 | 13.67336082 | 3.47E-05 | 6.51E-05    | KCNJ9,GRIN2B,GNB1,AKT2,AKT1            |
| Parkinson disease                           | hsa05012 | 5 | 309 | 75  | 61686 | 13.30873786 | 3.96E-05 | 7.37E-05    | VDAC2,PSMD12,PSMA2,NDUFB10,COX8C       |
| Tight junction                              | hsa04530 | 5 | 309 | 76  | 61686 | 13.13362289 | 4.22E-05 | 7.74E-05    | CFTR,ACTR2,ROCK1,OCLN,TJAP1            |
| Vascular smooth muscle contraction          | hsa04270 | 5 | 309 | 80  | 61686 | 12.47694175 | 5.40E-05 | 9.84E-05    | PLA2G4C,ROCK1,RAF1,MAPK1,ADM           |
| Hippo signaling pathway                     | hsa04390 | 5 | 309 | 82  | 61686 | 12.1726261  | 6.08E-05 | 0.000109979 | FZD6,GDF5,SOX2,SMAD2,WNT3A             |
| Basal cell carcinoma                        | hsa05217 | 4 | 309 | 31  | 61686 | 25.75884748 | 1.75E-05 | 3.45E-05    | CDKN1A,FZD6,WNT3A,POLK                 |

|                                                            |          |   |     |    |       |             |          |             |                              |
|------------------------------------------------------------|----------|---|-----|----|-------|-------------|----------|-------------|------------------------------|
| Thyroid cancer                                             | hsa05216 | 4 | 309 | 32 | 61686 | 24.9538835  | 1.99E-05 | 3.90E-05    | CDKN1A,MAPK1,KRAS,POLK       |
| RNA transport                                              | hsa03013 | 4 | 309 | 38 | 61686 | 21.01379663 | 3.99E-05 | 7.37E-05    | NUP50,FXR1,SMN1,EIF2S3       |
| Long-term potentiation                                     | hsa04720 | 4 | 309 | 43 | 61686 | 18.5703319  | 6.53E-05 | 0.000117402 | RAF1,MAPK1,KRAS,GRIN2B       |
| Mitophagy - animal                                         | hsa04137 | 4 | 309 | 44 | 61686 | 18.14827891 | 7.16E-05 | 0.00012686  | USP8,KRAS,FOXO3,E2F1         |
| Epithelial cell signaling in Helicobacter pylori infection | hsa05120 | 4 | 309 | 44 | 61686 | 18.14827891 | 7.16E-05 | 0.00012686  | ATP6V0E1,NFKBIA,EGFR,HBEGF   |
| Long-term depression                                       | hsa04730 | 4 | 309 | 45 | 61686 | 17.74498382 | 7.82E-05 | 0.000137739 | PLA2G4C,RAF1,MAPK1,KRAS      |
| Pertussis                                                  | hsa05133 | 4 | 309 | 53 | 61686 | 15.0664957  | 0.000149 | 0.000255317 | CASP7,MAPK1,IRAK1,IRAK4      |
| Gap junction                                               | hsa04540 | 4 | 309 | 59 | 61686 | 13.53430969 | 0.000226 | 0.000382478 | RAF1,MAPK1,KRAS,EGFR         |
| Rheumatoid arthritis                                       | hsa05323 | 4 | 309 | 59 | 61686 | 13.53430969 | 0.000226 | 0.000382478 | ATP6V0E1,VEGFA,TEK,CXCL12    |
| Oocyte meiosis                                             | hsa04114 | 4 | 309 | 60 | 61686 | 13.30873786 | 0.000241 | 0.000405523 | CCNB1,CCNE2,MAPK1,PGR        |
| Inflammatory mediator regulation of TRP channels           | hsa04750 | 4 | 309 | 61 | 61686 | 13.09056183 | 0.000257 | 0.000429472 | PLA2G4C,PIK3R3,PIK3R2,PIK3R1 |
| Circadian entrainment                                      | hsa04713 | 4 | 309 | 64 | 61686 | 12.47694175 | 0.00031  | 0.000513437 | MAPK1,KCNJ9,GRIN2B,GNB1      |
| Amoebiasis                                                 | hsa05146 | 4 | 309 | 65 | 61686 | 12.2849888  | 0.000329 | 0.000541468 | PIK3R3,RAB5B,PIK3R2,PIK3R1   |
| Thermogenesis                                              | hsa04714 | 4 | 309 | 74 | 61686 | 10.79086854 | 0.000539 | 0.000860711 | NDUFB10,KRAS,COX8C,ACSL4     |
| Phagosome                                                  | hsa04145 | 4 | 309 | 77 | 61686 | 10.37044509 | 0.000627 | 0.000988192 | ATP6V0E1,THBS1,RAB5B,SEC61A1 |
| Th17 cell differentiation                                  | hsa04659 | 4 | 309 | 81 | 61686 | 9.858324344 | 0.000759 | 0.001188729 | MAPK1,NFKBIA,SMAD2,GATA3     |
| Ribosome                                                   | hsa03010 | 3 | 309 | 9  | 61686 | 66.54368932 | 1.02E-05 | 2.09E-05    | RPS5,RPL7,RPSA               |
| Oxidative phosphorylation                                  | hsa00190 | 3 | 309 | 20 | 61686 | 29.94466019 | 0.000133 | 0.000229769 | ATP6V0E1,NDUFB10,COX8C       |
| Vibrio cholerae                                            | hsa051   | 3 | 309 | 27 | 61686 | 22.181229   | 0.00     | 0.000       | CFTR,ATP6V0E1,SEC61A1        |

|                                              |              |   |     |     |       |                 |                  |                     |                        |
|----------------------------------------------|--------------|---|-----|-----|-------|-----------------|------------------|---------------------|------------------------|
| infection                                    | 10           |   |     |     |       | 77              | 033<br>3         | 54515<br>7          |                        |
| Arachidonic acid metabolism                  | hsa005<br>90 | 3 | 309 | 28  | 61686 | 21.389043       | 0.00<br>037<br>2 | 0.000<br>60446<br>7 | PLA2G4C,PTGS2,CYP2E1   |
| Inositol phosphate metabolism                | hsa005<br>62 | 3 | 309 | 30  | 61686 | 19.963106<br>8  | 0.00<br>045<br>7 | 0.000<br>73891<br>9 | PIP5K1A,PIK3CG,IMPA1   |
| Intestinal immune network for IgA production | hsa046<br>72 | 3 | 309 | 31  | 61686 | 19.319135<br>61 | 0.00<br>050<br>4 | 0.000<br>80997<br>1 | CXCR4,CXCL12,TNFRSF17  |
| Chemical carcinogenesis                      | hsa052<br>04 | 3 | 309 | 32  | 61686 | 18.715412<br>62 | 0.00<br>055<br>4 | 0.000<br>87946<br>4 | PTGS2,CYP2E1,ADH1A     |
| Antigen processing and presentation          | hsa046<br>12 | 3 | 309 | 37  | 61686 | 16.186302<br>81 | 0.00<br>085<br>3 | 0.001<br>32787      | KIR3DL2,KIR3DL1,HSPA1B |
| Ovarian steroidogenesis                      | hsa049<br>13 | 3 | 309 | 38  | 61686 | 15.760347<br>47 | 0.00<br>092<br>2 | 0.001<br>42771      | PLA2G4C,PTGS2,LDLR     |
| Complement and coagulation cascades          | hsa046<br>10 | 3 | 309 | 43  | 61686 | 13.927748<br>93 | 0.00<br>132<br>4 | 0.002<br>02596      | TFPI,CD55,CR2          |
| Legionellosis                                | hsa051<br>34 | 3 | 309 | 44  | 61686 | 13.611209<br>18 | 0.00<br>141<br>6 | 0.002<br>1407       | CASP7,NFKBIA,HSPA1B    |
| Bile secretion                               | hsa049<br>76 | 3 | 309 | 47  | 61686 | 12.742408<br>59 | 0.00<br>171<br>5 | 0.002<br>56193      | CFTR,SLC2A1,LDLR       |
| PPAR signaling pathway                       | hsa033<br>20 | 3 | 309 | 50  | 61686 | 11.977864<br>08 | 0.00<br>205      | 0.003<br>04498      | GK,ACSL4,FABP7         |
| Th1 and Th2 cell differentiation             | hsa046<br>58 | 3 | 309 | 64  | 61686 | 9.3577063<br>11 | 0.00<br>413<br>8 | 0.006<br>04301      | MAPK1,NFKBIA,GATA3     |
| Necroptosis                                  | hsa042<br>17 | 3 | 309 | 84  | 61686 | 7.1296809<br>99 | 0.00<br>879<br>6 | 0.012<br>1532       | PLA2G4C,VDAC2,BCL2     |
| Neuroactive ligand-receptor interaction      | hsa040<br>80 | 3 | 309 | 148 | 61686 | 4.0465757<br>02 | 0.03<br>875<br>5 | 0.048<br>5858       | CHRNA5,GRIN2B,ADM      |

| Supplementary Table ST5: Genes associated with cholesterol, triglyceride and lipid metabolism as well as oxidative stress and validated targets of miR-126 and miR-132 (taken from ST3A and ST3B) |                         |                |                                                                                        |            |                                |            |
|---------------------------------------------------------------------------------------------------------------------------------------------------------------------------------------------------|-------------------------|----------------|----------------------------------------------------------------------------------------|------------|--------------------------------|------------|
| Genes                                                                                                                                                                                             | Category                | MicroRNA       | Term                                                                                   | ID         |                                |            |
| ANXA2                                                                                                                                                                                             | cholesterol             | hsa-miR-132-3p | positive regulation of receptor-mediated endocytosis involved in cholesterol transport | GO:1905602 |                                |            |
| LRP6                                                                                                                                                                                              | cholesterol             | hsa-miR-126-3p | receptor-mediated endocytosis involved in cholesterol transport                        | GO:0090118 |                                |            |
| SIRT1                                                                                                                                                                                             | cholesterol             | hsa-miR-126-3p | positive regulation of cholesterol efflux                                              | GO:0010875 |                                |            |
| NFKBIA                                                                                                                                                                                            | cholesterol             | hsa-miR-126-3p | positive regulation of cholesterol efflux                                              | GO:0010875 |                                |            |
| CFTR                                                                                                                                                                                              | cholesterol             | hsa-miR-132-3p | cholesterol transport                                                                  | GO:0030301 |                                |            |
| VDAC2                                                                                                                                                                                             | cholesterol             | hsa-miR-132-3p | Cholesterol metabolism                                                                 | hsa04979   |                                |            |
| LDLR                                                                                                                                                                                              | cholesterol             | hsa-miR-132-3p | receptor-mediated endocytosis involved in cholesterol transport                        | GO:0090118 | cholesterol transport          | GO:0030301 |
| GK                                                                                                                                                                                                | triglyceride            | hsa-miR-132-3p | triglyceride biosynthetic process                                                      | GO:0019432 | triglyceride metabolic process | GO:0006641 |
| ACSL4                                                                                                                                                                                             | triglyceride            | hsa-miR-132-3p | triglyceride biosynthetic process                                                      | GO:0019432 |                                |            |
| CYP2E1                                                                                                                                                                                            | triglyceride            | hsa-miR-132-3p | triglyceride metabolic process                                                         | GO:0006641 |                                |            |
| SIRT1                                                                                                                                                                                             | triglyceride            | hsa-miR-126-3p | triglyceride mobilization                                                              | GO:0006642 |                                |            |
| PIK3CG                                                                                                                                                                                            | triglyceride            | hsa-miR-126-3p | negative regulation of triglyceride catabolic process                                  | GO:0010897 |                                |            |
| <b>SIRT1</b>                                                                                                                                                                                      | oxidative stress        | hsa-miR-126-3p | response to oxidative stress                                                           | GO:0006979 |                                |            |
| BCL2                                                                                                                                                                                              | oxidative stress        | hsa-miR-126-3p | response to oxidative stress                                                           | GO:0006979 |                                |            |
| PTGS2                                                                                                                                                                                             | oxidative stress        | hsa-miR-132-3p | response to oxidative stress                                                           | GO:0006979 |                                |            |
| AKT1                                                                                                                                                                                              | oxidative stress        | hsa-miR-126-3p | response to oxidative stress                                                           | GO:0006979 |                                |            |
| EGFR                                                                                                                                                                                              | oxidative stress        | hsa-miR-132-3p | response to oxidative stress                                                           | GO:0006979 |                                |            |
| STAU1                                                                                                                                                                                             | oxidative stress        | hsa-miR-132-3p | cellular response to oxidative stress                                                  | GO:0034599 |                                |            |
| HSPA1B                                                                                                                                                                                            | oxidative stress        | hsa-miR-132-3p | cellular response to oxidative stress                                                  | GO:0034599 |                                |            |
| FOXO3                                                                                                                                                                                             | oxidative stress        | hsa-miR-126-3p | cellular response to oxidative stress                                                  | GO:0034599 |                                |            |
| FOXO1                                                                                                                                                                                             | oxidative stress        | hsa-miR-132-3p | cellular response to oxidative stress                                                  | GO:0034599 |                                |            |
| PLA2G4C                                                                                                                                                                                           | lipid metabolic process | hsa-miR-132-3p | lipid metabolic process                                                                | GO:0006629 |                                |            |
| PTGS2                                                                                                                                                                                             | lipid metabolic process | hsa-miR-132-3p | lipid metabolic process                                                                | GO:0006629 |                                |            |
| PLAGL2                                                                                                                                                                                            | lipid metabolic process | hsa-miR-132-3p | lipid metabolic process                                                                | GO:0006629 |                                |            |
| LDLR                                                                                                                                                                                              | lipid metabolic process | hsa-miR-132-3p | lipid metabolic process                                                                | GO:0006629 |                                |            |
| ACSL4                                                                                                                                                                                             | lipid metabolic process | hsa-miR-132-3p | lipid metabolic process                                                                | GO:0006629 |                                |            |
| CYP2E1                                                                                                                                                                                            | lipid metabolic process | hsa-miR-132-3p | lipid metabolic process                                                                | GO:0006629 |                                |            |
| ETNK2                                                                                                                                                                                             | lipid metabolic process | hsa-miR-132-3p | lipid metabolic process                                                                | GO:0006629 |                                |            |
| HACD3                                                                                                                                                                                             | lipid metabolic process | hsa-miR-132-3p | lipid metabolic process                                                                | GO:0006629 |                                |            |
| CRKL                                                                                                                                                                                              | lipid metabolic process | hsa-miR-126-3p | lipid metabolic process                                                                | GO:0006629 |                                |            |
| CRK                                                                                                                                                                                               | lipid metabolic process | hsa-miR-126-3p | lipid metabolic process                                                                | GO:0006629 |                                |            |
| ANXA2                                                                                                                                                                                             | low-density lipoprotein | hsa-miR-132-3p | positive regulation of low-density lipoprotein particle receptor binding               | GO:1905597 |                                |            |
